# Supplementary material for: Complex system modelling reveals oxalate homeostasis is driven by diverse oxalate-degrading bacteria
Source: bioRxiv preprint, doi:10.1101/2024.10.28.620613, version 2 (2025-02-19)
Supplement: Table S4 [file 620613_file04.xlsx]

## Sheet: NALB_selected_cor_named3
Table S4. The significant positive and negative correlations between microbial metabolites and host hepatic gene expression for those metabolites/genes significantly altered by 1.5% oxalate consumption. Data are listed with the host microbiome, metabollite and gene ID, long with correlation values and false discovery rate corrected p-values.
Microbiome	Metabolite ID	Mouse Gene	Pearson Correlation	FDR
NALB	Unknown	Amine sulfotransferase (EC 2.8.2.3) (SULT-X2) (Sulfotransferase 3A1) (ST3A1)	-0.886	0
NALB	Unknown	Amine sulfotransferase (EC 2.8.2.3) (SULT-X2) (Sulfotransferase 3A1) (ST3A1)	-0.867	0
NALB	Unknown	unknown	-0.759	0
NALB	Unknown	Amine sulfotransferase (EC 2.8.2.3) (SULT-X2) (Sulfotransferase 3A1) (ST3A1)	-0.742	0.01
NALB	Unknown	unknown	-0.737	0
NALB	Unknown	unknown	-0.735	0
NALB	Unknown	unknown	-0.73	0
NALB	Unknown	unknown	-0.718	0
NALB	Unknown	unknown	-0.696	0.02
NALB	Unknown	Amine sulfotransferase (EC 2.8.2.3) (SULT-X2) (Sulfotransferase 3A1) (ST3A1)	-0.691	0.05
NALB	Unknown	60S ribosomal protein L26	-0.69	0
NALB	Unknown	unknown	-0.673	0.01
NALB	Unknown	Amine sulfotransferase (EC 2.8.2.3) (SULT-X2) (Sulfotransferase 3A1) (ST3A1)	-0.669	0.05
NALB	Unknown	F-actin-uncapping protein LRRC16A	-0.668	0
NALB	Unknown	Uncharacterized protein	-0.656	0.01
NALB	Unknown	F-actin-uncapping protein LRRC16A	-0.655	0
NALB	Unknown	La ribonucleoprotein domain family, member 1B	-0.647	0.02
NALB	Unknown	60S ribosomal protein L26	-0.643	0.01
NALB	Unknown	unknown	-0.636	0.04
NALB	Unknown	60S ribosomal protein L26	-0.631	0.03
NALB	Unknown	60S ribosomal protein L26	-0.63	0.04
NALB	Unknown	Calcium-responsive transcription factor (ECBRC-FC1)	-0.624	0.05
NALB	Unknown	unknown	-0.624	0.02
NALB	Unknown	F-actin-uncapping protein LRRC16A	-0.623	0
NALB	Unknown	F-actin-uncapping protein LRRC16A	-0.609	0
NALB	Unknown	unknown	-0.602	0
NALB	Unknown	Calcium-responsive transcription factor (ECBRC-FC1)	-0.597	0.04
NALB	Unknown	unknown	-0.589	0.04
NALB	Unknown	unknown	-0.578	0.03
NALB	Unknown	unknown	-0.571	0.05
NALB	Unknown	Uncharacterized protein	-0.569	0
NALB	Unknown	Cholesterol 24-hydroxylase (Fragment)	-0.561	0
NALB	Unknown	unknown	-0.561	0
NALB	Unknown	unknown	-0.557	0.03
NALB	Unknown	unknown	-0.55	0.04
NALB	Unknown	unknown	-0.534	0.02
NALB	Unknown	unknown	-0.533	0.05
NALB	Unknown	unknown	-0.529	0
NALB	Unknown	unknown	-0.529	0.01
NALB	Unknown	unknown	-0.525	0.05
NALB	Unknown	Uncharacterized protein	-0.522	0
NALB	Unknown	unknown	-0.517	0.04
NALB	Unknown	Uncharacterized protein	-0.506	0.01
NALB	Unknown	60S ribosomal protein L26	-0.503	0.03
NALB	Unknown	Cholesterol 24-hydroxylase (Fragment)	-0.503	0.02
NALB	Unknown	unknown	-0.502	0.04
NALB	Unknown	AMP deaminase 3 (EC 3.5.4.6) (AMP deaminase H-type) (AMP deaminase isoform E) (Heart-type AMPD)	-0.496	0.04
NALB	Unknown	unknown	-0.496	0.05
NALB	Unknown	unknown	-0.494	0.01
NALB	Unknown	unknown	-0.494	0.02
NALB	Unknown	Cholesterol 24-hydroxylase (Fragment)	-0.494	0
NALB	Unknown	unknown	-0.492	0.03
NALB	Unknown	Uncharacterized protein	-0.491	0.01
NALB	Unknown	Uncharacterized protein	-0.487	0.03
NALB	Unknown	La ribonucleoprotein domain family, member 1B	-0.485	0.05
NALB	Unknown	unknown	-0.485	0.02
NALB	Unknown	unknown	-0.483	0.05
NALB	Unknown	Cholesterol 24-hydroxylase (Fragment)	-0.48	0.02
NALB	Unknown	unknown	-0.48	0.04
NALB	Unknown	unknown	-0.477	0.03
NALB	Unknown	Uncharacterized protein	-0.474	0.01
NALB	Unknown	60S ribosomal protein L26	-0.472	0.05
NALB	Unknown	unknown	-0.471	0
NALB	Unknown	unknown	-0.468	0.05
NALB	Unknown	unknown	-0.461	0.03
NALB	Unknown	Uncharacterized protein	-0.456	0.05
NALB	Unknown	Uncharacterized protein	-0.454	0.01
NALB	Unknown	unknown	-0.45	0
NALB	Unknown	unknown	-0.449	0.05
NALB	Unknown	unknown	-0.448	0.05
NALB	Unknown	Cholesterol 24-hydroxylase (Fragment)	-0.448	0.04
NALB	Unknown	Uncharacterized protein	-0.446	0.01
NALB	Unknown	unknown	-0.446	0.03
NALB	Unknown	Uncharacterized protein	-0.445	0.02
NALB	Unknown	unknown	-0.445	0
NALB	Unknown	unknown	-0.444	0.05
NALB	Unknown	Uncharacterized protein	-0.436	0.03
NALB	Unknown	Uncharacterized protein	-0.434	0.05
NALB	Unknown	Cholesterol 24-hydroxylase (Fragment)	-0.431	0.02
NALB	Unknown	unknown	-0.428	0.04
NALB	Unknown	unknown	-0.424	0.05
NALB	Unknown	Uncharacterized protein	-0.405	0.05
NALB	Unknown	Uncharacterized protein	-0.39	0.05
NALB	Unknown	unknown	0.329	0.05
NALB	Unknown	unknown	0.329	0.05
NALB	Unknown	unknown	0.342	0.04
NALB	Unknown	Cholesterol 24-hydroxylase (Fragment)	0.344	0.05
NALB	Unknown	unknown	0.36	0.05
NALB	Unknown	unknown	0.367	0.04
NALB	Unknown	unknown	0.388	0.03
NALB	Unknown	Cholesterol 24-hydroxylase (Fragment)	0.413	0.02
NALB	Unknown	unknown	0.424	0.04
NALB	Unknown	unknown	0.434	0
NALB	Unknown	unknown	0.436	0.02
NALB	Unknown	unknown	0.44	0
NALB	Unknown	unknown	0.441	0.04
NALB	Unknown	unknown	0.442	0.01
NALB	Unknown	unknown	0.443	0.04
NALB	Unknown	unknown	0.464	0.02
NALB	Unknown	unknown	0.469	0.01
NALB	Unknown	Cholesterol 24-hydroxylase (Fragment)	0.474	0.03
NALB	Unknown	unknown	0.479	0.04
NALB	Unknown	unknown	0.514	0.04
NALB	Unknown	unknown	0.521	0.02
NALB	Unknown	unknown	0.525	0.05
NALB	Unknown	unknown	0.525	0
NALB	Unknown	unknown	0.529	0
NALB	Unknown	unknown	0.529	0.04
NALB	Unknown	unknown	0.546	0
NALB	Unknown	unknown	0.547	0.02
NALB	Unknown	unknown	0.568	0.01
NALB	Unknown	Cholesterol 24-hydroxylase (Fragment)	0.577	0.02
NALB	Unknown	unknown	0.586	0.01
NALB	Unknown	unknown	0.588	0.04
NALB	Unknown	unknown	0.592	0.03
NALB	Unknown	Amine sulfotransferase (EC 2.8.2.3) (SULT-X2) (Sulfotransferase 3A1) (ST3A1)	0.628	0.05
NALB	Unknown	unknown	0.739	0.01
NALB	Unknown	unknown	0.749	0
NALB	18-bromo-8E,17E19Z-tricosatrien-4,6-diynoic acid	Uncharacterized protein	-0.604	0.02
NALB	18-bromo-8E,17E19Z-tricosatrien-4,6-diynoic acid	unknown	0.48	0.04
NALB	18-bromo-8E,17E19Z-tricosatrien-4,6-diynoic acid	unknown	0.481	0.01
NALB	18-bromo-8E,17E19Z-tricosatrien-4,6-diynoic acid	unknown	0.501	0.05
NALB	18-bromo-8E,17E19Z-tricosatrien-4,6-diynoic acid	unknown	0.501	0.03
NALB	18-bromo-8E,17E19Z-tricosatrien-4,6-diynoic acid	Cholesterol 24-hydroxylase (Fragment)	0.538	0.01
NALB	18-bromo-8E,17E19Z-tricosatrien-4,6-diynoic acid	F-actin-uncapping protein LRRC16A	0.606	0.02
NALB	18-bromo-8E,17E19Z-tricosatrien-4,6-diynoic acid	unknown	0.611	0.01
NALB	18-bromo-8E,17E19Z-tricosatrien-4,6-diynoic acid	60S ribosomal protein L26	0.641	0.02
NALB	18-bromo-8E,17E19Z-tricosatrien-4,6-diynoic acid	unknown	0.839	0
NALB	N-heptanoyl-homoserine lactone	unknown	-0.593	0
NALB	N-heptanoyl-homoserine lactone	unknown	0.79	0.03
NALB	Triacetin	Uncharacterized protein	-0.543	0
NALB	Triacetin	unknown	0.569	0
NALB	Glycerophosphoethanolamine	Uncharacterized protein	-0.472	0.04
NALB	Glycerophosphoethanolamine	unknown	0.346	0.04
NALB	Glycerophosphoethanolamine	unknown	0.366	0.02
NALB	Glycerophosphoethanolamine	unknown	0.524	0.01
NALB	Histamine	unknown	0.313	0.05
NALB	Scopolamine	Uncharacterized protein	-0.486	0
NALB	Thymidine	unknown	-0.549	0.01
NALB	Thymidine	unknown	0.77	0
NALB	3Z,13Z-octadecadien-1-ol	unknown	-0.713	0.02
NALB	3Z,13Z-octadecadien-1-ol	60S ribosomal protein L26	-0.688	0
NALB	3Z,13Z-octadecadien-1-ol	Calcium-responsive transcription factor (ECBRC-FC1)	-0.627	0.05
NALB	3Z,13Z-octadecadien-1-ol	F-actin-uncapping protein LRRC16A	-0.612	0
NALB	3Z,13Z-octadecadien-1-ol	unknown	-0.585	0.01
NALB	3Z,13Z-octadecadien-1-ol	Cholesterol 24-hydroxylase (Fragment)	-0.506	0.02
NALB	3Z,13Z-octadecadien-1-ol	unknown	-0.453	0.04
NALB	3Z,13Z-octadecadien-1-ol	unknown	-0.447	0.04
NALB	3Z,13Z-octadecadien-1-ol	unknown	-0.41	0.04
NALB	3Z,13Z-octadecadien-1-ol	unknown	0.555	0
NALB	1-Methylhistamine	Amine sulfotransferase (EC 2.8.2.3) (SULT-X2) (Sulfotransferase 3A1) (ST3A1)	-0.798	0.02
NALB	1-Methylhistamine	Uncharacterized protein	-0.745	0
NALB	1-Methylhistamine	unknown	0.44	0.05
NALB	1-Methylhistamine	F-actin-uncapping protein LRRC16A	0.517	0.04
NALB	1-Methylhistamine	unknown	0.719	0.01
NALB	2-Piperidinone	Amine sulfotransferase (EC 2.8.2.3) (SULT-X2) (Sulfotransferase 3A1) (ST3A1)	-0.657	0.02
NALB	cis-1,2-Dihydro-3-ethylcatechol	Uncharacterized protein	-0.397	0.03
NALB	Thymine	unknown	-0.567	0.01
NALB	Thymine	unknown	-0.544	0.02
NALB	Thymine	Cholesterol 24-hydroxylase (Fragment)	-0.466	0
NALB	Thymine	unknown	0.73	0
NALB	Tryptamine	unknown	-0.704	0
NALB	Tryptamine	F-actin-uncapping protein LRRC16A	-0.662	0
NALB	Tryptamine	60S ribosomal protein L26	-0.648	0.04
NALB	Tryptamine	unknown	-0.622	0.05
NALB	Tryptamine	unknown	-0.557	0.03
NALB	Tryptamine	unknown	-0.55	0.04
NALB	Tryptamine	Cholesterol 24-hydroxylase (Fragment)	-0.55	0.02
NALB	Tryptamine	unknown	-0.492	0.04
NALB	Tryptamine	unknown	-0.457	0.03
NALB	Tryptamine	unknown	0.517	0.05
NALB	Tryptamine	unknown	0.638	0.05
NALB	Methyl propenyl ketone	Uncharacterized protein	-0.528	0.05
NALB	2-Methyl-butanal	La ribonucleoprotein domain family, member 1B	-0.718	0
NALB	2-Methyl-butanal	unknown	-0.592	0.02
NALB	2-Methylbutyrylglycine	AMP deaminase 3 (EC 3.5.4.6) (AMP deaminase H-type) (AMP deaminase isoform E) (Heart-type AMPD)	-0.454	0.04
NALB	Beta-Alanine	unknown	-0.852	0.02
NALB	Beta-Alanine	unknown	-0.646	0.02
NALB	2-hydroxy pelargonic acid	Amine sulfotransferase (EC 2.8.2.3) (SULT-X2) (Sulfotransferase 3A1) (ST3A1)	-0.797	0.03
NALB	2-hydroxy pelargonic acid	Uncharacterized protein	-0.701	0
NALB	2-hydroxy pelargonic acid	unknown	0.397	0.04
NALB	2-hydroxy pelargonic acid	unknown	0.677	0.01
SWM	Unknown	Intraflagellar transport protein 22 homolog (Fragment)	-0.933	0
SWM	Tyramine	Intraflagellar transport protein 22 homolog (Fragment)	-0.93	0.01
SWM	Unknown	Intraflagellar transport protein 22 homolog (Fragment)	-0.926	0
SWM	Unknown	Intraflagellar transport protein 22 homolog (Fragment)	-0.924	0.01
SWM	Tyramine	Serine (Or cysteine) peptidase inhibitor, clade A, member 3C	-0.904	0.01
SWM	Unknown	Serine (Or cysteine) peptidase inhibitor, clade A, member 3C	-0.898	0.02
SWM	Unknown	unknown	-0.891	0
SWM	Unknown	Serine (Or cysteine) peptidase inhibitor, clade A, member 3C	-0.89	0
SWM	Unknown	Serine (Or cysteine) peptidase inhibitor, clade A, member 3C	-0.886	0.02
SWM	Unknown	40S ribosomal protein S14	-0.881	0.02
SWM	Unknown	unknown	-0.88	0.03
SWM	4-Hydroxybenzoic acid	unknown	-0.878	0
SWM	Unknown	MCG54087 (Serine (or cysteine) peptidase inhibitor, clade A (alpha-1 antiproteinase, antitrypsin), member 3J)	-0.877	0.01
SWM	Unknown	unknown	-0.875	0
SWM	Unknown	unknown	-0.875	0
SWM	Unknown	40S ribosomal protein S14	-0.875	0.01
SWM	Unknown	MCG54087 (Serine (or cysteine) peptidase inhibitor, clade A (alpha-1 antiproteinase, antitrypsin), member 3J)	-0.872	0
SWM	Mevalonic acid	40S ribosomal protein S14	-0.858	0.02
SWM	Simvastatin	unknown	-0.858	0.01
SWM	Unknown	MCG54087 (Serine (or cysteine) peptidase inhibitor, clade A (alpha-1 antiproteinase, antitrypsin), member 3J)	-0.858	0
SWM	Mevalonic acid	MCG54087 (Serine (or cysteine) peptidase inhibitor, clade A (alpha-1 antiproteinase, antitrypsin), member 3J)	-0.857	0.01
SWM	Tropinone	MCG54087 (Serine (or cysteine) peptidase inhibitor, clade A (alpha-1 antiproteinase, antitrypsin), member 3J)	-0.854	0
SWM	Unknown	MCG54087 (Serine (or cysteine) peptidase inhibitor, clade A (alpha-1 antiproteinase, antitrypsin), member 3J)	-0.852	0.02
SWM	Unknown	unknown	-0.848	0
SWM	Phenylethyl alcohol	40S ribosomal protein S27	-0.846	0.02
SWM	Tyramine	unknown	-0.846	0.01
SWM	Tyramine	unknown	-0.845	0.02
SWM	Unknown	Intraflagellar transport protein 22 homolog (Fragment)	-0.845	0
SWM	Unknown	unknown	-0.844	0.03
SWM	Mevalonic acid	unknown	-0.843	0.02
SWM	Unknown	60S ribosomal protein L19	-0.842	0
SWM	Unknown	unknown	-0.84	0.05
SWM	Unknown	unknown	-0.84	0
SWM	Unknown	Intraflagellar transport protein 22 homolog (Fragment)	-0.84	0.02
SWM	Unknown	unknown	-0.838	0.03
SWM	Unknown	60S ribosomal protein L19	-0.837	0
SWM	Tyramine	40S ribosomal protein S14	-0.835	0.02
SWM	Unknown	60S ribosomal protein L19	-0.834	0.04
SWM	Unknown	unknown	-0.834	0.05
SWM	Unknown	unknown	-0.832	0.01
SWM	Unknown	unknown	-0.83	0.01
SWM	Unknown	unknown	-0.826	0.04
SWM	Unknown	40S ribosomal protein S14	-0.825	0
SWM	Unknown	unknown	-0.823	0.03
SWM	Unknown	unknown	-0.822	0
SWM	Unknown	40S ribosomal protein S14	-0.822	0.01
SWM	Unknown	40S ribosomal protein S5 [Cleaved into: 40S ribosomal protein S5, N-terminally processed]	-0.822	0.03
SWM	L-Acetylcarnitine	MCG54087 (Serine (or cysteine) peptidase inhibitor, clade A (alpha-1 antiproteinase, antitrypsin), member 3J)	-0.821	0
SWM	Tyramine	unknown	-0.821	0.02
SWM	Unknown	Transmembrane protein 163 (Synaptic vesicle membrane protein of 31 kDa)	-0.821	0.01
SWM	Unknown	60S ribosomal protein L35	-0.818	0.01
SWM	Unknown	Transmembrane protein 163 (Synaptic vesicle membrane protein of 31 kDa)	-0.817	0
SWM	Diketospirilloxanthin/ 2,2'-Diketospirilloxanthin	60S ribosomal protein L19	-0.816	0.01
SWM	Unknown	unknown	-0.815	0.01
SWM	Unknown	Dolichol-phosphate mannosyltransferase subunit 3 (Dolichol-phosphate mannose synthase subunit 3) (DPM synthase subunit 3) (Dolichyl-phosphate beta-D-mannosyltransferase subunit 3) (Mannose-P-dolichol synthase subunit 3) (MPD synthase subunit 3)	-0.815	0.01
SWM	Mevalonic acid	Transmembrane protein 163 (Synaptic vesicle membrane protein of 31 kDa)	-0.812	0.01
SWM	Unknown	unknown	-0.812	0.03
SWM	Unknown	FMS-like tyrosine kinase 3 ligand, isoform CRA_g	-0.812	0.01
SWM	Unknown	unknown	-0.812	0.01
SWM	Unknown	60S ribosomal protein L35	-0.811	0
SWM	Unknown	unknown	-0.811	0
SWM	Mevalonic acid	unknown	-0.81	0.02
SWM	Unknown	unknown	-0.81	0.05
SWM	Unknown	unknown	-0.81	0.02
SWM	Unknown	60S ribosomal protein L19	-0.809	0.01
SWM	Unknown	unknown	-0.809	0.01
SWM	Unknown	60S ribosomal protein L19	-0.806	0
SWM	Tyramine	unknown	-0.804	0.03
SWM	Tyramine	unknown	-0.803	0.05
SWM	Unknown	60S ribosomal protein L41	-0.803	0.03
SWM	Simvastatin	unknown	-0.801	0
SWM	Unknown	unknown	-0.801	0.01
SWM	Futalosine	Translocon-associated protein subunit delta (TRAP-delta) (Signal sequence receptor subunit delta) (SSR-delta)	-0.8	0.01
SWM	Unknown	unknown	-0.8	0.03
SWM	Unknown	60S ribosomal protein L19	-0.799	0
SWM	2-Hydroxyadipic acid	Serine (Or cysteine) peptidase inhibitor, clade A, member 3C	-0.798	0.02
SWM	Unknown	40S ribosomal protein S14	-0.797	0.03
SWM	Unknown	Ribosomal protein	-0.79	0
SWM	Succinylacetoacetate	unknown	-0.788	0
SWM	Unknown	unknown	-0.788	0.02
SWM	Unknown	unknown	-0.788	0.02
SWM	Tropinone	40S ribosomal protein S14	-0.787	0.01
SWM	2-Hydroxyadipic acid	unknown	-0.785	0
SWM	Unknown	Ubiquinol-cytochrome-c reductase complex assembly factor 2	-0.78	0
SWM	Unknown	60S ribosomal protein L35	-0.78	0.01
SWM	(22R)-1alpha,25-dihydroxy-22-methoxy-26,27-dimethyl-23,23,24,24-tetradehydro-24a-homovitamin D3	60S ribosomal protein L19	-0.779	0
SWM	Unknown	Translocon-associated protein subunit delta (TRAP-delta) (Signal sequence receptor subunit delta) (SSR-delta)	-0.779	0.01
SWM	Unknown	unknown	-0.777	0.03
SWM	Simvastatin	60S ribosomal protein L41	-0.776	0.03
SWM	Unknown	40S ribosomal protein S14	-0.775	0.02
SWM	Unknown	Transmembrane protein 163 (Synaptic vesicle membrane protein of 31 kDa)	-0.773	0.03
SWM	Unknown	unknown	-0.773	0
SWM	Unknown	FMS-like tyrosine kinase 3 ligand, isoform CRA_g	-0.773	0.01
SWM	Unknown	unknown	-0.771	0.03
SWM	Unknown	Uncharacterized protein	-0.771	0.01
SWM	Unknown	unknown	-0.77	0
SWM	Unknown	Protein phosphatase 1 regulatory subunit 3B (Hepatic glycogen-targeting protein phosphatase 1 regulatory subunit GL) (Protein phosphatase 1 regulatory subunit 4) (PP1 subunit R4) (Protein phosphatase 1 subunit GL) (PTG)	-0.77	0.01
SWM	Unknown	40S ribosomal protein S14	-0.769	0
SWM	Unknown	unknown	-0.769	0.01
SWM	9,10-dichloro-octadecanoic acid	unknown	-0.768	0
SWM	Unknown	Serine (Or cysteine) peptidase inhibitor, clade A, member 3C	-0.768	0.02
SWM	Unknown	unknown	-0.767	0.02
SWM	Unknown	Protein PET100 homolog, mitochondrial	-0.767	0.02
SWM	Succinylacetoacetate	unknown	-0.766	0.01
SWM	Unknown	Uncharacterized protein	-0.765	0.01
SWM	Unknown	unknown	-0.765	0.02
SWM	Unknown	unknown	-0.764	0.04
SWM	Unknown	Protein PET100 homolog, mitochondrial	-0.764	0.02
SWM	Unknown	unknown	-0.763	0.01
SWM	N-Acetyl-L-phenylalanine	unknown	-0.762	0.01
SWM	Unknown	Ubiquinol-cytochrome-c reductase complex assembly factor 2	-0.762	0.02
SWM	Unknown	Translocon-associated protein subunit delta (TRAP-delta) (Signal sequence receptor subunit delta) (SSR-delta)	-0.762	0.01
SWM	15(S)-Hydroxyeicosatrienoic acid	Translocon-associated protein subunit delta (TRAP-delta) (Signal sequence receptor subunit delta) (SSR-delta)	-0.761	0.01
SWM	Succinylacetoacetate	40S ribosomal protein S5 [Cleaved into: 40S ribosomal protein S5, N-terminally processed]	-0.76	0.01
SWM	Unknown	unknown	-0.76	0
SWM	Tyramine	Translocon-associated protein subunit delta (TRAP-delta) (Signal sequence receptor subunit delta) (SSR-delta)	-0.759	0.01
SWM	Unknown	Ubiquinol-cytochrome-c reductase complex assembly factor 2	-0.758	0.02
SWM	Unknown	Serine (Or cysteine) peptidase inhibitor, clade A, member 3C	-0.757	0.02
SWM	Unknown	Uncharacterized protein (Fragment)	-0.757	0.01
SWM	Tyramine	Vesicular glutamate transporter 3	-0.756	0.02
SWM	Unknown	unknown	-0.756	0
SWM	Unknown	Translocon-associated protein subunit delta (TRAP-delta) (Signal sequence receptor subunit delta) (SSR-delta)	-0.755	0.02
SWM	Unknown	Translocon-associated protein subunit delta (TRAP-delta) (Signal sequence receptor subunit delta) (SSR-delta)	-0.755	0.02
SWM	Unknown	unknown	-0.754	0.02
SWM	Unknown	unknown	-0.754	0.01
SWM	Unknown	Ubiquinol-cytochrome-c reductase complex assembly factor 2	-0.754	0.01
SWM	Unknown	Protein phosphatase 1 regulatory subunit 3B (Hepatic glycogen-targeting protein phosphatase 1 regulatory subunit GL) (Protein phosphatase 1 regulatory subunit 4) (PP1 subunit R4) (Protein phosphatase 1 subunit GL) (PTG)	-0.753	0.01
SWM	Unknown	Major urinary protein 15	-0.752	0.01
SWM	Unknown	Protein phosphatase 1 regulatory subunit 3B (Hepatic glycogen-targeting protein phosphatase 1 regulatory subunit GL) (Protein phosphatase 1 regulatory subunit 4) (PP1 subunit R4) (Protein phosphatase 1 subunit GL) (PTG)	-0.752	0
SWM	9,10-dichloro-octadecanoic acid	Ubiquinol-cytochrome-c reductase complex assembly factor 2	-0.751	0.01
SWM	Unknown	40S ribosomal protein S15	-0.75	0.01
SWM	Unknown	Ubiquinol-cytochrome-c reductase complex assembly factor 2	-0.75	0
SWM	(22R)-1alpha,25-dihydroxy-22-methoxy-26,27-dimethyl-23,23,24,24-tetradehydro-24a-homovitamin D3	unknown	-0.749	0.01
SWM	2-Hydroxyadipic acid	unknown	-0.749	0.02
SWM	Unknown	unknown	-0.749	0.02
SWM	Unknown	Uncharacterized protein	-0.749	0.03
SWM	Unknown	Serine (Or cysteine) peptidase inhibitor, clade A, member 3C	-0.748	0.02
SWM	Unknown	Ribosomal protein	-0.748	0.03
SWM	L-Acetylcarnitine	Serine (Or cysteine) peptidase inhibitor, clade A, member 3C	-0.747	0.01
SWM	Unknown	Vesicular glutamate transporter 3	-0.747	0.03
SWM	Unknown	Translocon-associated protein subunit delta (TRAP-delta) (Signal sequence receptor subunit delta) (SSR-delta)	-0.747	0.02
SWM	Micropine	Translocon-associated protein subunit delta (TRAP-delta) (Signal sequence receptor subunit delta) (SSR-delta)	-0.746	0.03
SWM	Unknown	40S ribosomal protein S14	-0.746	0.02
SWM	Unknown	Translocon-associated protein subunit delta (TRAP-delta) (Signal sequence receptor subunit delta) (SSR-delta)	-0.746	0.01
SWM	Mevalonic acid	unknown	-0.745	0.02
SWM	Unknown	unknown	-0.745	0.02
SWM	Unknown	Vesicular glutamate transporter 3	-0.744	0.01
SWM	Unknown	unknown	-0.744	0.03
SWM	N-Acetyl-L-phenylalanine	Myeloid-derived growth factor (MYDGF) (Interleukin-25) (IL-25) (Stromal cell-derived growth factor SF20)	-0.743	0
SWM	Unknown	Mrpl20 protein	-0.743	0
SWM	Unknown	Translocon-associated protein subunit delta (TRAP-delta) (Signal sequence receptor subunit delta) (SSR-delta)	-0.743	0.01
SWM	Unknown	Translocon-associated protein subunit delta (TRAP-delta) (Signal sequence receptor subunit delta) (SSR-delta)	-0.742	0.01
SWM	Unknown	E3 ubiquitin-protein ligase PPP1R11 (EC 2.3.2.27) (Protein phosphatase 1 regulatory subunit 11) (T-complex testis expressed protein 5) (Tctex-5)	-0.741	0.02
SWM	Unknown	unknown	-0.741	0.01
SWM	Unknown	unknown	-0.74	0.01
SWM	Tropinone	Serine (Or cysteine) peptidase inhibitor, clade A, member 3C	-0.738	0
SWM	Unknown	unknown	-0.738	0
SWM	N-butanoyl-lhomoserine lactone	Translocon-associated protein subunit delta (TRAP-delta) (Signal sequence receptor subunit delta) (SSR-delta)	-0.737	0.03
SWM	Unknown	Uncharacterized protein	-0.737	0.02
SWM	Unknown	Translocon-associated protein subunit delta (TRAP-delta) (Signal sequence receptor subunit delta) (SSR-delta)	-0.737	0.01
SWM	Unknown	Translocon-associated protein subunit delta (TRAP-delta) (Signal sequence receptor subunit delta) (SSR-delta)	-0.737	0.02
SWM	Unknown	40S ribosomal protein S14	-0.736	0.04
SWM	Unknown	FMS-like tyrosine kinase 3 ligand, isoform CRA_g	-0.736	0.04
SWM	Unknown	unknown	-0.736	0
SWM	Unknown	Uncharacterized protein	-0.735	0.01
SWM	Unknown	Uncharacterized protein	-0.735	0
SWM	Unknown	FMS-like tyrosine kinase 3 ligand, isoform CRA_g	-0.735	0
SWM	Unknown	Protein phosphatase 1 regulatory subunit 3B (Hepatic glycogen-targeting protein phosphatase 1 regulatory subunit GL) (Protein phosphatase 1 regulatory subunit 4) (PP1 subunit R4) (Protein phosphatase 1 subunit GL) (PTG)	-0.735	0.01
SWM	Unknown	Translocon-associated protein subunit delta (TRAP-delta) (Signal sequence receptor subunit delta) (SSR-delta)	-0.734	0.01
SWM	Unknown	Translocon-associated protein subunit delta (TRAP-delta) (Signal sequence receptor subunit delta) (SSR-delta)	-0.734	0.01
SWM	1-Methylpyrrolinium	Apolipoprotein C-II (Apo-CII) (ApoC-II) (Apolipoprotein C2)	-0.733	0.03
SWM	Imidazol-5-yl-pyruvate	E3 ubiquitin-protein ligase PPP1R11 (EC 2.3.2.27) (Protein phosphatase 1 regulatory subunit 11) (T-complex testis expressed protein 5) (Tctex-5)	-0.733	0.03
SWM	Unknown	Ubiquinol-cytochrome-c reductase complex assembly factor 2	-0.732	0.02
SWM	Unknown	Uncharacterized protein	-0.732	0
SWM	Unknown	40S ribosomal protein S5 [Cleaved into: 40S ribosomal protein S5, N-terminally processed]	-0.732	0.02
SWM	Unknown	unknown	-0.731	0.02
SWM	Unknown	Ubiquinol-cytochrome-c reductase complex assembly factor 2	-0.731	0.01
SWM	2-Hydroxyadipic acid	unknown	-0.73	0
SWM	2-Octenedioic acid	Major urinary protein 15	-0.73	0.01
SWM	N-Acetyl-L-phenylalanine	Ubiquinol-cytochrome-c reductase complex assembly factor 2	-0.73	0.04
SWM	Unknown	unknown	-0.73	0.02
SWM	Unknown	unknown	-0.73	0.02
SWM	Unknown	unknown	-0.73	0.01
SWM	Unknown	unknown	-0.73	0.03
SWM	Lipoamide	Translocon-associated protein subunit delta (TRAP-delta) (Signal sequence receptor subunit delta) (SSR-delta)	-0.728	0.01
SWM	Unknown	Ribosomal protein	-0.728	0
SWM	Unknown	Myeloid-derived growth factor (MYDGF) (Interleukin-25) (IL-25) (Stromal cell-derived growth factor SF20)	-0.728	0.04
SWM	Unknown	40S ribosomal protein S14	-0.728	0.04
SWM	3-Carboxy-cis,cis-muconate	Translocon-associated protein subunit delta (TRAP-delta) (Signal sequence receptor subunit delta) (SSR-delta)	-0.727	0.04
SWM	Aminoadipic acid	40S ribosomal protein S14	-0.727	0.02
SWM	Unknown	unknown	-0.727	0.04
SWM	Unknown	Vesicular glutamate transporter 3	-0.727	0.02
SWM	Unknown	Protein phosphatase 1 regulatory subunit 3B (Hepatic glycogen-targeting protein phosphatase 1 regulatory subunit GL) (Protein phosphatase 1 regulatory subunit 4) (PP1 subunit R4) (Protein phosphatase 1 subunit GL) (PTG)	-0.727	0.04
SWM	Unknown	Translocon-associated protein subunit delta (TRAP-delta) (Signal sequence receptor subunit delta) (SSR-delta)	-0.727	0.02
SWM	4-Hydroxybenzoic acid	unknown	-0.726	0.01
SWM	alpha-Tocopherol acetate	Protein phosphatase 1 regulatory subunit 3B (Hepatic glycogen-targeting protein phosphatase 1 regulatory subunit GL) (Protein phosphatase 1 regulatory subunit 4) (PP1 subunit R4) (Protein phosphatase 1 subunit GL) (PTG)	-0.726	0.03
SWM	Homoanserine	Major urinary protein 15	-0.726	0.04
SWM	Mevalonic acid	Intraflagellar transport protein 22 homolog (Fragment)	-0.726	0
SWM	Unknown	Protein phosphatase 1 regulatory subunit 3B (Hepatic glycogen-targeting protein phosphatase 1 regulatory subunit GL) (Protein phosphatase 1 regulatory subunit 4) (PP1 subunit R4) (Protein phosphatase 1 subunit GL) (PTG)	-0.726	0.01
SWM	Diketospirilloxanthin/ 2,2'-Diketospirilloxanthin	unknown	-0.725	0.01
SWM	Unknown	FMS-like tyrosine kinase 3 ligand, isoform CRA_g	-0.724	0.05
SWM	Unknown	Ubiquinol-cytochrome-c reductase complex assembly factor 2	-0.723	0.01
SWM	Unknown	FMS-like tyrosine kinase 3 ligand, isoform CRA_g	-0.723	0.02
SWM	Unknown	Translocon-associated protein subunit delta (TRAP-delta) (Signal sequence receptor subunit delta) (SSR-delta)	-0.722	0.05
SWM	Unknown	Ubiquinol-cytochrome-c reductase complex assembly factor 2	-0.721	0.04
SWM	Unknown	Translocon-associated protein subunit delta (TRAP-delta) (Signal sequence receptor subunit delta) (SSR-delta)	-0.721	0.02
SWM	Unknown	40S ribosomal protein S14	-0.72	0.02
SWM	Unknown	Ubiquinol-cytochrome-c reductase complex assembly factor 2	-0.719	0.02
SWM	Unknown	unknown	-0.718	0.05
SWM	Unknown	Uncharacterized protein	-0.717	0.02
SWM	Unknown	Myeloid-derived growth factor (MYDGF) (Interleukin-25) (IL-25) (Stromal cell-derived growth factor SF20)	-0.716	0.01
SWM	Unknown	40S ribosomal protein S14	-0.716	0.01
SWM	Unknown	40S ribosomal protein S14	-0.716	0.03
SWM	Unknown	Uncharacterized protein	-0.716	0.01
SWM	Futalosine	FMS-like tyrosine kinase 3 ligand, isoform CRA_g	-0.715	0.01
SWM	Unknown	unknown	-0.715	0.03
SWM	bacteriohopane-32,33,34-triol-35-carbamate	Ubiquinol-cytochrome-c reductase complex assembly factor 2	-0.714	0.04
SWM	5-Hydroxyindoleacetic acid	Translocon-associated protein subunit delta (TRAP-delta) (Signal sequence receptor subunit delta) (SSR-delta)	-0.714	0.03
SWM	Aminoadipic acid	Translocon-associated protein subunit delta (TRAP-delta) (Signal sequence receptor subunit delta) (SSR-delta)	-0.714	0.02
SWM	Unknown	unknown	-0.714	0
SWM	Unknown	Mrpl20 protein	-0.714	0.01
SWM	2-Indolecarboxylic acid	Translocon-associated protein subunit delta (TRAP-delta) (Signal sequence receptor subunit delta) (SSR-delta)	-0.713	0.01
SWM	Unknown	Mannose-binding protein A (MBP-A) (Mannan-binding protein) (Ra-reactive factor polysaccharide-binding component p28B) (RaRF p28B)	-0.713	0.03
SWM	Unknown	Protein phosphatase 1 regulatory subunit 3B (Hepatic glycogen-targeting protein phosphatase 1 regulatory subunit GL) (Protein phosphatase 1 regulatory subunit 4) (PP1 subunit R4) (Protein phosphatase 1 subunit GL) (PTG)	-0.713	0.01
SWM	bacteriohopane-32,33,34-triol-35-carbamate	Uncharacterized protein	-0.712	0.01
SWM	2-Hydroxyadipic acid	40S ribosomal protein S5 [Cleaved into: 40S ribosomal protein S5, N-terminally processed]	-0.712	0.04
SWM	4-Oxo-4-(3-pyridyl)-butanamide	Translocon-associated protein subunit delta (TRAP-delta) (Signal sequence receptor subunit delta) (SSR-delta)	-0.712	0.03
SWM	L-Acetylcarnitine	unknown	-0.712	0.04
SWM	Tyramine	FMS-like tyrosine kinase 3 ligand, isoform CRA_g	-0.712	0.03
SWM	Unknown	Transmembrane protein 163 (Synaptic vesicle membrane protein of 31 kDa)	-0.712	0.03
SWM	Unknown	Translocon-associated protein subunit delta (TRAP-delta) (Signal sequence receptor subunit delta) (SSR-delta)	-0.712	0.02
SWM	Unknown	Translocon-associated protein subunit delta (TRAP-delta) (Signal sequence receptor subunit delta) (SSR-delta)	-0.712	0.01
SWM	9,10-dichloro-octadecanoic acid	Protein phosphatase 1 regulatory subunit 3B (Hepatic glycogen-targeting protein phosphatase 1 regulatory subunit GL) (Protein phosphatase 1 regulatory subunit 4) (PP1 subunit R4) (Protein phosphatase 1 subunit GL) (PTG)	-0.711	0.01
SWM	1-Pyrroline-5-carboxylic acid	40S ribosomal protein S14	-0.711	0.01
SWM	Unknown	Proteasome subunit beta type-3 (EC 3.4.25.1) (Proteasome chain 13) (Proteasome component C10-II) (Proteasome theta chain)	-0.711	0.03
SWM	Unknown	40S ribosomal protein S14	-0.711	0.04
SWM	Unknown	40S ribosomal protein S14	-0.71	0.05
SWM	Unknown	Intraflagellar transport protein 22 homolog (Fragment)	-0.71	0
SWM	15(S)-Hydroxyeicosatrienoic acid	FMS-like tyrosine kinase 3 ligand, isoform CRA_g	-0.709	0.02
SWM	4-Hydroxybenzoic acid	40S ribosomal protein S14	-0.709	0.04
SWM	D-Lactaldehyde	Transmembrane protein 205 (Fragment)	-0.709	0.01
SWM	Unknown	Serine (Or cysteine) peptidase inhibitor, clade A, member 3C	-0.709	0.02
SWM	Unknown	Serine (Or cysteine) peptidase inhibitor, clade A, member 3C	-0.709	0.04
SWM	Unknown	unknown	-0.709	0
SWM	Unknown	Uncharacterized protein	-0.709	0.01
SWM	Unknown	Zinc-alpha-2-glycoprotein (Zn-alpha-2-GP) (Zn-alpha-2-glycoprotein)	-0.709	0.05
SWM	Unknown	Translocon-associated protein subunit delta (TRAP-delta) (Signal sequence receptor subunit delta) (SSR-delta)	-0.708	0.02
SWM	Unknown	unknown	-0.707	0.04
SWM	Unknown	unknown	-0.707	0.04
SWM	alpha-Tocopherol acetate	Ubiquinol-cytochrome-c reductase complex assembly factor 2	-0.706	0.02
SWM	L-Acetylcarnitine	40S ribosomal protein S14	-0.706	0.03
SWM	Unknown	unknown	-0.706	0.04
SWM	Unknown	Protein phosphatase 1 regulatory subunit 3B (Hepatic glycogen-targeting protein phosphatase 1 regulatory subunit GL) (Protein phosphatase 1 regulatory subunit 4) (PP1 subunit R4) (Protein phosphatase 1 subunit GL) (PTG)	-0.706	0.02
SWM	Unknown	Translocon-associated protein subunit delta (TRAP-delta) (Signal sequence receptor subunit delta) (SSR-delta)	-0.706	0.05
SWM	Unknown	60S ribosomal protein L39	-0.706	0.01
SWM	Unknown	unknown	-0.705	0.02
SWM	bacteriohopane-32,33,34-triol-35-carbamate	Protein phosphatase 1 regulatory subunit 3B (Hepatic glycogen-targeting protein phosphatase 1 regulatory subunit GL) (Protein phosphatase 1 regulatory subunit 4) (PP1 subunit R4) (Protein phosphatase 1 subunit GL) (PTG)	-0.704	0.03
SWM	15(S)-Hydroxyeicosatrienoic acid	40S ribosomal protein S14	-0.704	0.04
SWM	2-Methyl-3-hydroxybutyric acid	Transmembrane protein 205 (Fragment)	-0.704	0.02
SWM	Unknown	Ubiquinol-cytochrome-c reductase complex assembly factor 2	-0.704	0
SWM	Unknown	Ubiquinol-cytochrome-c reductase complex assembly factor 2	-0.704	0.03
SWM	Unknown	Ubiquinol-cytochrome-c reductase complex assembly factor 2	-0.704	0.01
SWM	Unknown	FMS-like tyrosine kinase 3 ligand, isoform CRA_g	-0.704	0.05
SWM	Unknown	unknown	-0.703	0.03
SWM	Unknown	Myosin light polypeptide 6 (17 kDa myosin light chain) (LC17) (Myosin light chain 3) (MLC-3) (Myosin light chain alkali 3) (Myosin light chain A3) (Smooth muscle and nonmuscle myosin light chain alkali 6)	-0.703	0.05
SWM	Unknown	60S ribosomal protein L38	-0.703	0.05
SWM	Unknown	Protein phosphatase 1 regulatory subunit 3B (Hepatic glycogen-targeting protein phosphatase 1 regulatory subunit GL) (Protein phosphatase 1 regulatory subunit 4) (PP1 subunit R4) (Protein phosphatase 1 subunit GL) (PTG)	-0.703	0.05
SWM	Unknown	unknown	-0.702	0.01
SWM	1-Methylpyrrolinium	39S ribosomal protein L12, mitochondrial (L12mt) (MRP-L12)	-0.701	0.02
SWM	Unknown	Serpin A12 (Visceral adipose tissue-derived serine protease inhibitor) (Vaspin) (Visceral adipose-specific serpin)	-0.701	0.02
SWM	Unknown	Translocon-associated protein subunit delta (TRAP-delta) (Signal sequence receptor subunit delta) (SSR-delta)	-0.701	0.03
SWM	Glucosylceramide	Protein phosphatase 1 regulatory subunit 3B (Hepatic glycogen-targeting protein phosphatase 1 regulatory subunit GL) (Protein phosphatase 1 regulatory subunit 4) (PP1 subunit R4) (Protein phosphatase 1 subunit GL) (PTG)	-0.7	0.01
SWM	Tyramine	MCG54087 (Serine (or cysteine) peptidase inhibitor, clade A (alpha-1 antiproteinase, antitrypsin), member 3J)	-0.7	0.05
SWM	Unknown	60S ribosomal protein L19	-0.7	0.03
SWM	Unknown	unknown	-0.7	0.02
SWM	Unknown	Protein phosphatase 1 regulatory subunit 3B (Hepatic glycogen-targeting protein phosphatase 1 regulatory subunit GL) (Protein phosphatase 1 regulatory subunit 4) (PP1 subunit R4) (Protein phosphatase 1 subunit GL) (PTG)	-0.7	0.01
SWM	D-Lactaldehyde	unknown	-0.699	0.03
SWM	Unknown	40S ribosomal protein S14	-0.699	0.02
SWM	Unknown	Translocon-associated protein subunit delta (TRAP-delta) (Signal sequence receptor subunit delta) (SSR-delta)	-0.699	0.02
SWM	4-Hydroxybenzoic acid	Transmembrane protein 163 (Synaptic vesicle membrane protein of 31 kDa)	-0.697	0.05
SWM	Tropinone	Intraflagellar transport protein 22 homolog (Fragment)	-0.697	0.05
SWM	Unknown	unknown	-0.697	0.03
SWM	Unknown	unknown	-0.697	0.04
SWM	Unknown	Ubiquinol-cytochrome-c reductase complex assembly factor 2	-0.696	0.01
SWM	Unknown	40S ribosomal protein S14	-0.696	0.03
SWM	Unknown	40S ribosomal protein S14	-0.694	0
SWM	Unknown	Protein phosphatase 1 regulatory subunit 3B (Hepatic glycogen-targeting protein phosphatase 1 regulatory subunit GL) (Protein phosphatase 1 regulatory subunit 4) (PP1 subunit R4) (Protein phosphatase 1 subunit GL) (PTG)	-0.694	0.02
SWM	Unknown	60S ribosomal protein L39	-0.694	0.03
SWM	Behenic acid	Neutral cholesterol ester hydrolase 1	-0.693	0.01
SWM	Simvastatin	Myeloid-derived growth factor (MYDGF) (Interleukin-25) (IL-25) (Stromal cell-derived growth factor SF20)	-0.693	0.03
SWM	Unknown	Protein phosphatase 1 regulatory subunit 3B (Hepatic glycogen-targeting protein phosphatase 1 regulatory subunit GL) (Protein phosphatase 1 regulatory subunit 4) (PP1 subunit R4) (Protein phosphatase 1 subunit GL) (PTG)	-0.693	0.02
SWM	Hexatriacontapentaenoic acid	Ubiquinol-cytochrome-c reductase complex assembly factor 2	-0.692	0.04
SWM	Unknown	unknown	-0.692	0.01
SWM	Unknown	Ubiquinol-cytochrome-c reductase complex assembly factor 2	-0.692	0.03
SWM	Unknown	Uncharacterized protein	-0.692	0.02
SWM	Unknown	Uncharacterized protein	-0.692	0.01
SWM	Unknown	40S ribosomal protein S27	-0.692	0.05
SWM	alpha-Tocopherol acetate	Uncharacterized protein	-0.691	0.04
SWM	Unknown	40S ribosomal protein S14	-0.691	0.03
SWM	Unknown	unknown	-0.691	0.05
SWM	Unknown	Translocon-associated protein subunit delta (TRAP-delta) (Signal sequence receptor subunit delta) (SSR-delta)	-0.691	0.02
SWM	Unknown	unknown	-0.689	0.03
SWM	Unknown	Ankyrin repeat domain-containing protein 37	-0.689	0
SWM	2,6-Diamino-4-hydroxy-5-N-methylformamidopyrimidine	Translocon-associated protein subunit delta (TRAP-delta) (Signal sequence receptor subunit delta) (SSR-delta)	-0.688	0.01
SWM	4-Hydroxybenzoic acid	Intraflagellar transport protein 22 homolog (Fragment)	-0.688	0.03
SWM	Unknown	Transmembrane protein 163 (Synaptic vesicle membrane protein of 31 kDa)	-0.688	0.03
SWM	Unknown	MCG54087 (Serine (or cysteine) peptidase inhibitor, clade A (alpha-1 antiproteinase, antitrypsin), member 3J)	-0.688	0.04
SWM	4-Hydroxybenzoic acid	unknown	-0.687	0.02
SWM	4-Oxo-4-(3-pyridyl)-butanamide	40S ribosomal protein S14	-0.687	0
SWM	Micropine	FMS-like tyrosine kinase 3 ligand, isoform CRA_g	-0.687	0.02
SWM	Unknown	Myeloid-derived growth factor (MYDGF) (Interleukin-25) (IL-25) (Stromal cell-derived growth factor SF20)	-0.687	0.03
SWM	Behenic acid	Cysteine and glycine-rich protein 2 (Fragment)	-0.686	0.03
SWM	Succinylacetoacetate	Retinoic acid receptor responder protein 2	-0.686	0.03
SWM	Unknown	Protein PET100 homolog, mitochondrial	-0.686	0.03
SWM	Succinylacetoacetate	Transmembrane protein 205 (Fragment)	-0.685	0.04
SWM	Unknown	Beta-crystallin B3 (Fragment)	-0.685	0
SWM	Unknown	Beta-crystallin B3 (Fragment)	-0.685	0.01
SWM	Unknown	Liver-expressed antimicrobial peptide 2 (LEAP-2)	-0.684	0.05
SWM	Unknown	40S ribosomal protein S14	-0.684	0.05
SWM	Unknown	Retinoic acid receptor responder protein 2	-0.684	0.03
SWM	2-Methyl-3-hydroxybutyric acid	Retinoic acid receptor responder protein 2	-0.683	0.02
SWM	2-Indolecarboxylic acid	FMS-like tyrosine kinase 3 ligand, isoform CRA_g	-0.682	0.02
SWM	Unknown	Intraflagellar transport protein 22 homolog (Fragment)	-0.682	0.03
SWM	Unknown	unknown	-0.682	0.02
SWM	Unknown	unknown	-0.682	0.02
SWM	15(S)-Hydroxyeicosatrienoic acid	unknown	-0.681	0.01
SWM	4-Oxo-4-(3-pyridyl)-butanamide	FMS-like tyrosine kinase 3 ligand, isoform CRA_g	-0.681	0.05
SWM	5-Hydroxyindoleacetic acid	40S ribosomal protein S14	-0.681	0.03
SWM	Lipoamide	FMS-like tyrosine kinase 3 ligand, isoform CRA_g	-0.681	0.01
SWM	Unknown	39S ribosomal protein L12, mitochondrial (L12mt) (MRP-L12)	-0.681	0.05
SWM	Unknown	unknown	-0.681	0.05
SWM	Unknown	unknown	-0.681	0.05
SWM	Unknown	unknown	-0.681	0.04
SWM	Unknown	FMS-like tyrosine kinase 3 ligand, isoform CRA_g	-0.681	0.04
SWM	Unknown	unknown	-0.681	0.03
SWM	N-Acetyl-L-phenylalanine	unknown	-0.68	0.05
SWM	Unknown	Transmembrane protein 163 (Synaptic vesicle membrane protein of 31 kDa)	-0.68	0.04
SWM	Unknown	40S ribosomal protein S14	-0.68	0.01
SWM	Unknown	40S ribosomal protein S14	-0.68	0.02
SWM	2-Octenedioic acid	unknown	-0.679	0.02
SWM	1-Pyrroline-5-carboxylic acid	Translocon-associated protein subunit delta (TRAP-delta) (Signal sequence receptor subunit delta) (SSR-delta)	-0.678	0.05
SWM	Succinylacetoacetate	40S ribosomal protein S14	-0.678	0.03
SWM	Tropinone	unknown	-0.678	0.04
SWM	Unknown	unknown	-0.678	0.01
SWM	Unknown	Cysteine and glycine-rich protein 2 (Fragment)	-0.678	0.05
SWM	Unknown	Proteasome subunit beta type-3 (EC 3.4.25.1) (Proteasome chain 13) (Proteasome component C10-II) (Proteasome theta chain)	-0.678	0
SWM	Unknown	FMS-like tyrosine kinase 3 ligand, isoform CRA_g	-0.678	0.03
SWM	Unknown	unknown	-0.677	0.05
SWM	Unknown	unknown	-0.676	0.02
SWM	Hexatriacontapentaenoic acid	Protein phosphatase 1 regulatory subunit 3B (Hepatic glycogen-targeting protein phosphatase 1 regulatory subunit GL) (Protein phosphatase 1 regulatory subunit 4) (PP1 subunit R4) (Protein phosphatase 1 subunit GL) (PTG)	-0.675	0.03
SWM	Unknown	FMS-like tyrosine kinase 3 ligand, isoform CRA_g	-0.675	0.04
SWM	2-Hydroxyadipic acid	40S ribosomal protein S14	-0.674	0.03
SWM	Tropinone	unknown	-0.674	0.02
SWM	Unknown	Liver-expressed antimicrobial peptide 2 (LEAP-2)	-0.674	0.02
SWM	Unknown	MCG54087 (Serine (or cysteine) peptidase inhibitor, clade A (alpha-1 antiproteinase, antitrypsin), member 3J)	-0.674	0.02
SWM	Unknown	40S ribosomal protein S14	-0.674	0.01
SWM	Unknown	Uncharacterized protein	-0.674	0.05
SWM	Unknown	Major urinary protein 18	-0.674	0.04
SWM	Unknown	unknown	-0.673	0
SWM	Unknown	Protein phosphatase 1 regulatory subunit 3B (Hepatic glycogen-targeting protein phosphatase 1 regulatory subunit GL) (Protein phosphatase 1 regulatory subunit 4) (PP1 subunit R4) (Protein phosphatase 1 subunit GL) (PTG)	-0.673	0.03
SWM	Unknown	unknown	-0.673	0.02
SWM	4-(2-Aminophenyl)-2,4-dioxobutanoic acid	Protein PET100 homolog, mitochondrial	-0.672	0.01
SWM	Tropinone	unknown	-0.672	0.02
SWM	Unknown	Protein phosphatase 1 regulatory subunit 3B (Hepatic glycogen-targeting protein phosphatase 1 regulatory subunit GL) (Protein phosphatase 1 regulatory subunit 4) (PP1 subunit R4) (Protein phosphatase 1 subunit GL) (PTG)	-0.672	0.01
SWM	Homoanserine	unknown	-0.671	0.02
SWM	Unknown	60S ribosomal protein L19	-0.67	0.05
SWM	Unknown	60S ribosomal protein L36	-0.67	0.04
SWM	Mevalonic acid	Beta-crystallin B3 (Fragment)	-0.669	0.05
SWM	Micropine	40S ribosomal protein S14	-0.669	0.04
SWM	Succinylacetoacetate	unknown	-0.669	0.02
SWM	Unknown	60S ribosomal protein L19	-0.669	0.02
SWM	Unknown	Ubiquinol-cytochrome-c reductase complex assembly factor 2	-0.669	0.03
SWM	N-butanoyl-lhomoserine lactone	40S ribosomal protein S14	-0.668	0.05
SWM	Mevalonic acid	unknown	-0.668	0.03
SWM	Unknown	MCG54087 (Serine (or cysteine) peptidase inhibitor, clade A (alpha-1 antiproteinase, antitrypsin), member 3J)	-0.668	0.03
SWM	Unknown	unknown	-0.668	0.01
SWM	Unknown	40S ribosomal protein S14	-0.668	0.04
SWM	Unknown	unknown	-0.667	0.03
SWM	Unknown	40S ribosomal protein S14	-0.667	0.04
SWM	Unknown	40S ribosomal protein S14	-0.667	0.03
SWM	Unknown	Ankyrin repeat domain-containing protein 37	-0.667	0
SWM	2-Hydroxyadipic acid	unknown	-0.666	0
SWM	Unknown	unknown	-0.666	0.01
SWM	Unknown	Neutral cholesterol ester hydrolase 1	-0.666	0.01
SWM	Unknown	FMS-like tyrosine kinase 3 ligand, isoform CRA_g	-0.666	0.03
SWM	Unknown	Ankyrin repeat domain-containing protein 37	-0.666	0
SWM	Unknown	Translocon-associated protein subunit delta (TRAP-delta) (Signal sequence receptor subunit delta) (SSR-delta)	-0.665	0.03
SWM	Unknown	unknown	-0.663	0.02
SWM	Unknown	40S ribosomal protein S14	-0.663	0.04
SWM	Simvastatin	Protein transport protein Sec61 subunit gamma	-0.662	0.05
SWM	Unknown	40S ribosomal protein S14	-0.662	0.05
SWM	Unknown	unknown	-0.662	0.03
SWM	Unknown	Retinoic acid receptor responder protein 2	-0.662	0.03
SWM	Unknown	Retinoic acid receptor responder protein 2	-0.662	0.04
SWM	1-(1Z-hexadecenyl)-2-dodecanoyl-glycero-3-phosphoserine	Proteasome subunit beta type (EC 3.4.25.1)	-0.661	0.02
SWM	2-Indolecarboxylic acid	Beta-crystallin B3 (Fragment)	-0.661	0.03
SWM	Lipoamide	40S ribosomal protein S14	-0.661	0.03
SWM	Unknown	Ubiquinol-cytochrome-c reductase complex assembly factor 2	-0.661	0.04
SWM	Unknown	Mrpl20 protein	-0.661	0.05
SWM	4-(2-Aminophenyl)-2,4-dioxobutanoic acid	Transmembrane protein 205 (Fragment)	-0.66	0.05
SWM	Unknown	unknown	-0.66	0.05
SWM	Unknown	unknown	-0.66	0.02
SWM	Unknown	FMS-like tyrosine kinase 3 ligand, isoform CRA_g	-0.659	0.05
SWM	Unknown	Transmembrane protein 205 (Fragment)	-0.659	0.02
SWM	Unknown	60S ribosomal protein L36	-0.658	0.02
SWM	Unknown	Protein PET100 homolog, mitochondrial	-0.658	0.04
SWM	Hexatriacontapentaenoic acid	unknown	-0.657	0.03
SWM	Imidazol-5-yl-pyruvate	unknown	-0.657	0.04
SWM	Unknown	Transmembrane protein 205 (Fragment)	-0.657	0.03
SWM	Unknown	unknown	-0.657	0.05
SWM	4-Hydroxybenzoic acid	40S ribosomal protein S14	-0.656	0.04
SWM	Unknown	unknown	-0.656	0.04
SWM	4-(2-Aminophenyl)-2,4-dioxobutanoic acid	Retinoic acid receptor responder protein 2	-0.655	0.01
SWM	N-butanoyl-lhomoserine lactone	FMS-like tyrosine kinase 3 ligand, isoform CRA_g	-0.654	0.05
SWM	D-Lactaldehyde	Glutathione S-transferase Mu 5	-0.654	0.03
SWM	Tyramine	unknown	-0.654	0.04
SWM	Unknown	unknown	-0.654	0.02
SWM	Unknown	Proteasome subunit beta type-3 (EC 3.4.25.1) (Proteasome chain 13) (Proteasome component C10-II) (Proteasome theta chain)	-0.654	0.02
SWM	Unknown	Protein PET100 homolog, mitochondrial	-0.654	0.04
SWM	1-Pyrroline-5-carboxylic acid	unknown	-0.653	0.04
SWM	4-Hydroxybenzoic acid	unknown	-0.653	0.02
SWM	L-Acetylcarnitine	Intraflagellar transport protein 22 homolog (Fragment)	-0.653	0.04
SWM	Unknown	unknown	-0.653	0.05
SWM	Isopropanol	40S ribosomal protein S14	-0.652	0.04
SWM	Unknown	unknown	-0.652	0.04
SWM	Unknown	Cysteine and glycine-rich protein 2 (Fragment)	-0.652	0.04
SWM	2-Indolecarboxylic acid	40S ribosomal protein S14	-0.651	0.04
SWM	2-Methyl-3-hydroxybutyric acid	Retinoic acid receptor responder protein 2	-0.651	0.01
SWM	Erucic acid	Retinoic acid receptor responder protein 2	-0.651	0.05
SWM	Erucic acid	Transmembrane protein 205 (Fragment)	-0.651	0.05
SWM	Unknown	unknown	-0.651	0.04
SWM	Unknown	40S ribosomal protein S5 [Cleaved into: 40S ribosomal protein S5, N-terminally processed]	-0.651	0.05
SWM	Unknown	Proteasome subunit beta type (EC 3.4.25.1)	-0.65	0.03
SWM	Unknown	Transmembrane protein 205 (Fragment)	-0.65	0.03
SWM	Unknown	Retinoic acid receptor responder protein 2	-0.649	0.03
SWM	Unknown	Ankyrin repeat domain-containing protein 37	-0.649	0
SWM	Ecgonine methyl ester	Transmembrane protein 205 (Fragment)	-0.648	0.05
SWM	N-Phenylacetylphenylalanine	Protein FAM25C	-0.648	0.04
SWM	Unknown	Liver-expressed antimicrobial peptide 2 (LEAP-2)	-0.648	0.02
SWM	Unknown	unknown	-0.648	0.05
SWM	Unknown	Retinoic acid receptor responder protein 2	-0.648	0.04
SWM	Unknown	FMS-like tyrosine kinase 3 ligand, isoform CRA_g	-0.648	0.01
SWM	Aminoadipic acid	FMS-like tyrosine kinase 3 ligand, isoform CRA_g	-0.647	0.02
SWM	Unknown	unknown	-0.647	0.03
SWM	Unknown	Iodothyronine deiodinase	-0.647	0.04
SWM	Unknown	Retinoic acid receptor responder protein 2	-0.647	0.04
SWM	D-Lactaldehyde	40S ribosomal protein S5 [Cleaved into: 40S ribosomal protein S5, N-terminally processed]	-0.646	0.03
SWM	Unknown	B9 domain-containing protein 1 (Fragment)	-0.646	0.03
SWM	Unknown	unknown	-0.646	0.04
SWM	Unknown	Ankyrin repeat domain-containing protein 37	-0.646	0.01
SWM	Glucosylceramide	Ankyrin repeat domain-containing protein 37	-0.645	0
SWM	Homoanserine	unknown	-0.645	0
SWM	Unknown	unknown	-0.645	0.05
SWM	Unknown	Retinoic acid receptor responder protein 2	-0.645	0
SWM	Unknown	FMS-like tyrosine kinase 3 ligand, isoform CRA_g	-0.645	0.04
SWM	Unknown	60S ribosomal protein L39	-0.645	0.02
SWM	4-Hydroxybenzoic acid	unknown	-0.644	0.03
SWM	Unknown	unknown	-0.644	0.02
SWM	Unknown	Myeloid-derived growth factor (MYDGF) (Interleukin-25) (IL-25) (Stromal cell-derived growth factor SF20)	-0.644	0.05
SWM	Unknown	60S ribosomal protein L35	-0.644	0.04
SWM	Unknown	FMS-like tyrosine kinase 3 ligand, isoform CRA_g	-0.644	0.04
SWM	4-Hydroxybenzoic acid	FMS-like tyrosine kinase 3 ligand, isoform CRA_g	-0.643	0.02
SWM	Simvastatin	Uncharacterized protein (Fragment)	-0.643	0.04
SWM	Unknown	60S ribosomal protein L19	-0.643	0.03
SWM	Unknown	60S ribosomal protein L36	-0.643	0.05
SWM	Unknown	Neutral cholesterol ester hydrolase 1	-0.643	0.03
SWM	Unknown	unknown	-0.643	0.05
SWM	Unknown	unknown	-0.642	0.05
SWM	Unknown	Apolipoprotein C-II (Apo-CII) (ApoC-II) (Apolipoprotein C2)	-0.642	0.04
SWM	[(2R)-1-[2-aminoethoxy(hydroxy)phosphoryl]oxy-3-hydroxypropan-2-yl] (Z)-hexadec-9-enoate	Mitochondrial import receptor subunit TOM5 homolog	-0.641	0.03
SWM	Unknown	Cysteine and glycine-rich protein 2 (Fragment)	-0.641	0.04
SWM	Unknown	unknown	-0.641	0.02
SWM	Unknown	60S ribosomal protein L36	-0.641	0.03
SWM	Unknown	unknown	-0.641	0.04
SWM	Unknown	NADH dehydrogenase [ubiquinone] 1 beta subcomplex subunit 11, mitochondrial (Complex I-ESSS) (CI-ESSS) (NADH-ubiquinone oxidoreductase ESSS subunit) (Neuronal protein 15.6) (Np15.6) (p15.6)	-0.641	0.03
SWM	Unknown	NADH dehydrogenase [ubiquinone] 1 beta subcomplex subunit 11, mitochondrial (Complex I-ESSS) (CI-ESSS) (NADH-ubiquinone oxidoreductase ESSS subunit) (Neuronal protein 15.6) (Np15.6) (p15.6)	-0.641	0.03
SWM	4-Hydroxybenzoic acid	Retinoic acid receptor responder protein 2	-0.64	0.05
SWM	Unknown	unknown	-0.64	0.01
SWM	Unknown	unknown	-0.64	0.05
SWM	Unknown	Transmembrane protein 205 (Fragment)	-0.64	0.05
SWM	3-Hexanone	Protein PET100 homolog, mitochondrial	-0.639	0.05
SWM	Unknown	unknown	-0.639	0.03
SWM	Unknown	Beta-crystallin B3 (Fragment)	-0.639	0.04
SWM	Unknown	FMS-like tyrosine kinase 3 ligand, isoform CRA_g	-0.639	0.05
SWM	Unknown	Transmembrane protein 205 (Fragment)	-0.639	0.03
SWM	Unknown	NADH dehydrogenase [ubiquinone] 1 beta subcomplex subunit 11, mitochondrial (Complex I-ESSS) (CI-ESSS) (NADH-ubiquinone oxidoreductase ESSS subunit) (Neuronal protein 15.6) (Np15.6) (p15.6)	-0.639	0.04
SWM	Aminoadipic acid	unknown	-0.638	0
SWM	L-Acetylcarnitine	unknown	-0.638	0.02
SWM	Unknown	Beta-crystallin B3 (Fragment)	-0.638	0.02
SWM	Unknown	Beta-crystallin B3 (Fragment)	-0.638	0.04
SWM	Unknown	Protein PET100 homolog, mitochondrial	-0.638	0.02
SWM	Tyramine	unknown	-0.637	0.04
SWM	Unknown	Beta-crystallin B3 (Fragment)	-0.637	0.04
SWM	Unknown	unknown	-0.637	0
SWM	Unknown	FMS-like tyrosine kinase 3 ligand, isoform CRA_g	-0.637	0.05
SWM	Unknown	Protein PET100 homolog, mitochondrial	-0.637	0.04
SWM	Hexatriacontapentaenoic acid	Uncharacterized protein	-0.636	0.03
SWM	Unknown	FMS-like tyrosine kinase 3 ligand, isoform CRA_g	-0.636	0.03
SWM	1-Methylpyrrolinium	NADH dehydrogenase [ubiquinone] 1 beta subcomplex subunit 11, mitochondrial (Complex I-ESSS) (CI-ESSS) (NADH-ubiquinone oxidoreductase ESSS subunit) (Neuronal protein 15.6) (Np15.6) (p15.6)	-0.635	0.03
SWM	Unknown	Proteasome subunit beta type-3 (EC 3.4.25.1) (Proteasome chain 13) (Proteasome component C10-II) (Proteasome theta chain)	-0.635	0.03
SWM	Unknown	unknown	-0.635	0.03
SWM	Unknown	Transmembrane protein 205 (Fragment)	-0.635	0.02
SWM	Unknown	Transmembrane protein 205 (Fragment)	-0.635	0.03
SWM	1-Methylpyrrolinium	Protein FAM25C	-0.634	0.05
SWM	alpha-Tocopherol acetate	Ankyrin repeat domain-containing protein 37	-0.634	0.01
SWM	Ecgonine methyl ester	Retinoic acid receptor responder protein 2	-0.634	0.04
SWM	Futalosine	unknown	-0.634	0
SWM	Unknown	unknown	-0.634	0.02
SWM	Unknown	unknown	-0.634	0.03
SWM	Unknown	unknown	-0.634	0.05
SWM	Unknown	unknown	-0.634	0.04
SWM	Unknown	60S ribosomal protein L36	-0.634	0.05
SWM	2-Hydroxyadipic acid	Ribosomal protein	-0.633	0.03
SWM	Unknown	unknown	-0.633	0.03
SWM	Unknown	unknown	-0.633	0.01
SWM	Unknown	Oxygen-dependent coproporphyrinogen-III oxidase, mitochondrial (COX) (Coprogen oxidase) (Coproporphyrinogenase) (EC 1.3.3.3)	-0.633	0.02
SWM	Unknown	unknown	-0.633	0.02
SWM	Unknown	unknown	-0.633	0.01
SWM	Isopropanol	Beta-crystallin B3 (Fragment)	-0.632	0.04
SWM	Tropinone	B9 domain-containing protein 1 (Fragment)	-0.632	0.02
SWM	Unknown	Uncharacterized protein	-0.632	0.03
SWM	Unknown	Mrpl20 protein	-0.632	0.03
SWM	Unknown	Retinoic acid receptor responder protein 2	-0.632	0.05
SWM	Unknown	NADH dehydrogenase [ubiquinone] 1 beta subcomplex subunit 11, mitochondrial (Complex I-ESSS) (CI-ESSS) (NADH-ubiquinone oxidoreductase ESSS subunit) (Neuronal protein 15.6) (Np15.6) (p15.6)	-0.632	0.03
SWM	2,6-Diamino-4-hydroxy-5-N-methylformamidopyrimidine	FMS-like tyrosine kinase 3 ligand, isoform CRA_g	-0.631	0
SWM	Unknown	Mrpl20 protein	-0.631	0.05
SWM	Unknown	Transmembrane protein 205 (Fragment)	-0.631	0.05
SWM	Unknown	Transmembrane protein 205 (Fragment)	-0.631	0.02
SWM	Homoanserine	Iodothyronine deiodinase	-0.63	0.05
SWM	Unknown	Mitochondrial import inner membrane translocase subunit Tim22	-0.63	0.05
SWM	Unknown	Proteasome subunit beta type-3 (EC 3.4.25.1) (Proteasome chain 13) (Proteasome component C10-II) (Proteasome theta chain)	-0.63	0.01
SWM	Unknown	Liver-expressed antimicrobial peptide 2 (LEAP-2)	-0.63	0.05
SWM	Unknown	unknown	-0.63	0.05
SWM	6-Dimethylaminopurine	unknown	-0.629	0.03
SWM	Unknown	60S ribosomal protein L41	-0.629	0.05
SWM	Unknown	Beta-crystallin B3 (Fragment)	-0.629	0.04
SWM	Unknown	Retinoic acid receptor responder protein 2	-0.629	0.02
SWM	Unknown	40S ribosomal protein S5 [Cleaved into: 40S ribosomal protein S5, N-terminally processed]	-0.629	0.05
SWM	9,10-dichloro-octadecanoic acid	unknown	-0.627	0.02
SWM	[(2R)-1-[2-aminoethoxy(hydroxy)phosphoryl]oxy-3-hydroxypropan-2-yl] (Z)-hexadec-9-enoate	Liver-expressed antimicrobial peptide 2 (LEAP-2)	-0.627	0.04
SWM	Ecgonine methyl ester	NADH dehydrogenase [ubiquinone] 1 beta subcomplex subunit 11, mitochondrial (Complex I-ESSS) (CI-ESSS) (NADH-ubiquinone oxidoreductase ESSS subunit) (Neuronal protein 15.6) (Np15.6) (p15.6)	-0.627	0.03
SWM	Unknown	unknown	-0.627	0.04
SWM	Unknown	unknown	-0.627	0.04
SWM	Unknown	Retinoic acid receptor responder protein 2	-0.627	0.05
SWM	Unknown	unknown	-0.626	0.02
SWM	Unknown	Ribosomal protein	-0.626	0.03
SWM	Unknown	Transmembrane protein 205 (Fragment)	-0.626	0.04
SWM	Unknown	NADH dehydrogenase [ubiquinone] 1 beta subcomplex subunit 11, mitochondrial (Complex I-ESSS) (CI-ESSS) (NADH-ubiquinone oxidoreductase ESSS subunit) (Neuronal protein 15.6) (Np15.6) (p15.6)	-0.626	0.01
SWM	4-Oxo-4-(3-pyridyl)-butanamide	unknown	-0.625	0.04
SWM	Unknown	unknown	-0.625	0.04
SWM	Unknown	Mrpl20 protein	-0.625	0.03
SWM	Unknown	Intraflagellar transport protein 22 homolog (Fragment)	-0.625	0.04
SWM	Unknown	Retinoic acid receptor responder protein 2	-0.625	0.03
SWM	Unknown	39S ribosomal protein L23, mitochondrial	-0.625	0.02
SWM	Unknown	Eukaryotic translation initiation factor 3 subunit K	-0.625	0.04
SWM	Unknown	Ankyrin repeat domain-containing protein 37	-0.625	0.02
SWM	2-Methyl-3-hydroxybutyric acid	Transmembrane protein 205 (Fragment)	-0.624	0.04
SWM	Unknown	unknown	-0.624	0.02
SWM	Unknown	Ubiquinol-cytochrome-c reductase complex assembly factor 2	-0.624	0.04
SWM	Unknown	FMS-like tyrosine kinase 3 ligand, isoform CRA_g	-0.624	0.05
SWM	Unknown	Ankyrin repeat domain-containing protein 37	-0.624	0.03
SWM	5beta-cholestane	unknown	-0.623	0.02
SWM	Unknown	Uncharacterized protein	-0.623	0.04
SWM	Unknown	Transmembrane protein 205 (Fragment)	-0.623	0.05
SWM	3-Carboxy-cis,cis-muconate	FMS-like tyrosine kinase 3 ligand, isoform CRA_g	-0.622	0.04
SWM	Futalosine	Beta-crystallin B3 (Fragment)	-0.622	0.04
SWM	Unknown	B9 domain-containing protein 1 (Fragment)	-0.622	0.02
SWM	Unknown	Transcription factor MafB (Maf-B) (Kreisler) (Segmentation protein Kr) (Transcription factor Maf-1) (V-maf musculoaponeurotic fibrosarcoma oncogene homolog B)	-0.622	0.03
SWM	Unknown	unknown	-0.621	0.04
SWM	Unknown	Uncharacterized protein (Fragment)	-0.621	0.03
SWM	Unknown	Transmembrane protein 205 (Fragment)	-0.621	0.04
SWM	Phenylethyl alcohol	unknown	-0.62	0.03
SWM	Unknown	unknown	-0.62	0.04
SWM	Unknown	Solute carrier family 22 member 7	-0.62	0.05
SWM	Unknown	Ankyrin repeat domain-containing protein 37	-0.62	0.01
SWM	9,10-dichloro-octadecanoic acid	Oxygen-dependent coproporphyrinogen-III oxidase, mitochondrial (COX) (Coprogen oxidase) (Coproporphyrinogenase) (EC 1.3.3.3)	-0.619	0.03
SWM	bacteriohopane-32,33,34-triol-35-carbamate	Oxygen-dependent coproporphyrinogen-III oxidase, mitochondrial (COX) (Coprogen oxidase) (Coproporphyrinogenase) (EC 1.3.3.3)	-0.619	0.02
SWM	Unknown	B9 domain-containing protein 1 (Fragment)	-0.619	0.02
SWM	Unknown	unknown	-0.619	0.05
SWM	Unknown	Transmembrane protein 205 (Fragment)	-0.619	0.03
SWM	Unknown	unknown	-0.618	0.01
SWM	Unknown	Translocon-associated protein subunit delta (TRAP-delta) (Signal sequence receptor subunit delta) (SSR-delta)	-0.618	0.04
SWM	Unknown	NADH dehydrogenase [ubiquinone] 1 beta subcomplex subunit 11, mitochondrial (Complex I-ESSS) (CI-ESSS) (NADH-ubiquinone oxidoreductase ESSS subunit) (Neuronal protein 15.6) (Np15.6) (p15.6)	-0.618	0.03
SWM	5-Hydroxyindoleacetic acid	unknown	-0.617	0.01
SWM	Tropinone	unknown	-0.617	0.03
SWM	Unknown	Protein PET100 homolog, mitochondrial	-0.617	0.05
SWM	alpha-Tocopherol acetate	Eukaryotic translation initiation factor 3 subunit I (eIF3i) (Eukaryotic translation initiation factor 3 subunit 2) (eIF-3-beta) (eIF3 p36)	-0.616	0.04
SWM	Unknown	Histidine triad nucleotide-binding protein 1 (EC 3.-.-.-) (Adenosine 5'-monophosphoramidase) (Protein kinase C inhibitor 1) (Protein kinase C-interacting protein 1) (PKCI-1)	-0.616	0.05
SWM	Unknown	Protein transport protein Sec61 subunit gamma	-0.616	0.02
SWM	Unknown	unknown	-0.616	0.05
SWM	Unknown	unknown	-0.615	0.03
SWM	Unknown	Oxygen-dependent coproporphyrinogen-III oxidase, mitochondrial (COX) (Coprogen oxidase) (Coproporphyrinogenase) (EC 1.3.3.3)	-0.615	0.03
SWM	Unknown	Eukaryotic translation initiation factor 3 subunit K	-0.615	0.04
SWM	Unknown	Oxygen-dependent coproporphyrinogen-III oxidase, mitochondrial (COX) (Coprogen oxidase) (Coproporphyrinogenase) (EC 1.3.3.3)	-0.614	0.04
SWM	Unknown	unknown	-0.614	0.04
SWM	Unknown	Intraflagellar transport protein 22 homolog (Fragment)	-0.614	0.02
SWM	Unknown	Zinc-alpha-2-glycoprotein (Zn-alpha-2-GP) (Zn-alpha-2-glycoprotein)	-0.614	0.05
SWM	Unknown	Sal-like 1 (Drosophila) (Sal-like protein 1)	-0.614	0.02
SWM	9,10-dichloro-octadecanoic acid	Ankyrin repeat domain-containing protein 37	-0.613	0
SWM	2-Octenedioic acid	Iodothyronine deiodinase	-0.613	0.05
SWM	Unknown	unknown	-0.613	0.05
SWM	Unknown	Beta-crystallin B3 (Fragment)	-0.613	0.03
SWM	Unknown	Protein PET100 homolog, mitochondrial	-0.613	0.04
SWM	Glucosylceramide	60S ribosomal protein L36	-0.612	0.03
SWM	Unknown	Mannose-binding protein A (MBP-A) (Mannan-binding protein) (Ra-reactive factor polysaccharide-binding component p28B) (RaRF p28B)	-0.612	0.03
SWM	Unknown	60S ribosomal protein L36	-0.612	0.04
SWM	Unknown	Beta-crystallin B3 (Fragment)	-0.612	0.02
SWM	Unknown	Beta-crystallin B3 (Fragment)	-0.612	0.02
SWM	2,6-Diamino-4-hydroxy-5-N-methylformamidopyrimidine	40S ribosomal protein S14	-0.611	0.04
SWM	Hexatriacontapentaenoic acid	Ankyrin repeat domain-containing protein 37	-0.611	0.01
SWM	Unknown	Histidine triad nucleotide-binding protein 1 (EC 3.-.-.-) (Adenosine 5'-monophosphoramidase) (Protein kinase C inhibitor 1) (Protein kinase C-interacting protein 1) (PKCI-1)	-0.611	0.03
SWM	Lipoamide	Beta-crystallin B3 (Fragment)	-0.61	0.04
SWM	Unknown	Uncharacterized protein	-0.61	0.03
SWM	Unknown	unknown	-0.61	0.04
SWM	Unknown	unknown	-0.61	0.02
SWM	Unknown	unknown	-0.61	0.05
SWM	Unknown	Oxygen-dependent coproporphyrinogen-III oxidase, mitochondrial (COX) (Coprogen oxidase) (Coproporphyrinogenase) (EC 1.3.3.3)	-0.61	0.02
SWM	Unknown	FMS-like tyrosine kinase 3 ligand, isoform CRA_g	-0.61	0.04
SWM	Unknown	Transmembrane protein 205 (Fragment)	-0.61	0.04
SWM	2-Methyl-3-hydroxybutyric acid	Protein PET100 homolog, mitochondrial	-0.609	0.05
SWM	N-Phenylacetylphenylalanine	Mitochondrial import inner membrane translocase subunit Tim22	-0.609	0.05
SWM	Unknown	Transmembrane protein 163 (Synaptic vesicle membrane protein of 31 kDa)	-0.609	0.03
SWM	Unknown	Eukaryotic translation initiation factor 3 subunit K	-0.609	0.03
SWM	Isopropanol	unknown	-0.608	0.04
SWM	Lipoamide	unknown	-0.608	0.04
SWM	Unknown	60S ribosomal protein L35	-0.608	0.03
SWM	Unknown	G1/S-specific cyclin-D2 (Fragment)	-0.608	0.01
SWM	Unknown	Tyrosine-protein kinase ZAP-70 (Fragment)	-0.607	0.03
SWM	Unknown	unknown	-0.607	0.03
SWM	Unknown	Mitochondrial import inner membrane translocase subunit Tim22	-0.607	0.05
SWM	N-Formiminoglycine	unknown	-0.606	0.05
SWM	Unknown	unknown	-0.606	0.02
SWM	Unknown	Beta-crystallin B3 (Fragment)	-0.606	0.05
SWM	Unknown	Retinoic acid receptor responder protein 2	-0.606	0.04
SWM	Unknown	G1/S-specific cyclin-D2 (Fragment)	-0.606	0.02
SWM	Behenic acid	40S ribosomal protein S15	-0.605	0.03
SWM	Imidazol-5-yl-pyruvate	Protein transport protein Sec61 subunit gamma	-0.605	0.04
SWM	Unknown	40S ribosomal protein S15	-0.605	0.03
SWM	Unknown	Vesicular glutamate transporter 3	-0.605	0.02
SWM	Unknown	unknown	-0.605	0.02
SWM	Unknown	unknown	-0.605	0.05
SWM	Unknown	Protein PET100 homolog, mitochondrial	-0.605	0.04
SWM	Unknown	Ankyrin repeat domain-containing protein 37	-0.605	0.01
SWM	bacteriohopane-32,33,34-triol-35-carbamate	unknown	-0.604	0.03
SWM	Unknown	unknown	-0.604	0.05
SWM	Erucic acid	NADH dehydrogenase [ubiquinone] 1 beta subcomplex subunit 11, mitochondrial (Complex I-ESSS) (CI-ESSS) (NADH-ubiquinone oxidoreductase ESSS subunit) (Neuronal protein 15.6) (Np15.6) (p15.6)	-0.603	0.01
SWM	Unknown	Liver-expressed antimicrobial peptide 2 (LEAP-2)	-0.603	0.03
SWM	Unknown	MCG116671	-0.603	0.04
SWM	Unknown	unknown	-0.603	0.05
SWM	Unknown	unknown	-0.603	0.05
SWM	Unknown	unknown	-0.603	0.02
SWM	Unknown	NADH dehydrogenase [ubiquinone] 1 beta subcomplex subunit 11, mitochondrial (Complex I-ESSS) (CI-ESSS) (NADH-ubiquinone oxidoreductase ESSS subunit) (Neuronal protein 15.6) (Np15.6) (p15.6)	-0.603	0.05
SWM	1-Methylpyrrolinium	Probable threonine--tRNA ligase 2, cytoplasmic (EC 6.1.1.3) (Threonyl-tRNA synthetase) (ThrRS) (Threonyl-tRNA synthetase-like protein 2)	-0.602	0.05
SWM	6-Dimethylaminopurine	unknown	-0.602	0.03
SWM	Unknown	60S ribosomal protein L19	-0.602	0.03
SWM	Unknown	PH and SEC7 domain-containing protein 4 (Exchange factor for ADP-ribosylation factor guanine nucleotide factor 6 B) (Exchange factor for ARF6 B) (Pleckstrin homology and SEC7 domain-containing protein 4)	-0.602	0.04
SWM	Unknown	Retinoic acid receptor responder protein 2	-0.602	0.03
SWM	Unknown	Probable threonine--tRNA ligase 2, cytoplasmic (EC 6.1.1.3) (Threonyl-tRNA synthetase) (ThrRS) (Threonyl-tRNA synthetase-like protein 2)	-0.602	0.04
SWM	Unknown	Protein PET100 homolog, mitochondrial	-0.602	0.05
SWM	Unknown	Ankyrin repeat domain-containing protein 37	-0.602	0.01
SWM	1-Pyrroline-5-carboxylic acid	unknown	-0.601	0.03
SWM	6-Dimethylaminopurine	Protein transport protein Sec61 subunit gamma	-0.601	0.03
SWM	Hexatriacontapentaenoic acid	MCG116671	-0.601	0.04
SWM	Tyramine	unknown	-0.601	0.03
SWM	Unknown	unknown	-0.601	0.03
SWM	Unknown	B9 domain-containing protein 1 (Fragment)	-0.601	0.04
SWM	Unknown	unknown	-0.601	0.01
SWM	Unknown	unknown	-0.601	0
SWM	Unknown	unknown	-0.601	0.03
SWM	alpha-Tocopherol acetate	Proteasome subunit beta type-3 (EC 3.4.25.1) (Proteasome chain 13) (Proteasome component C10-II) (Proteasome theta chain)	-0.6	0.04
SWM	Glucosylceramide	unknown	-0.6	0.03
SWM	Unknown	unknown	-0.6	0.05
SWM	Unknown	unknown	-0.6	0.05
SWM	Unknown	G1/S-specific cyclin-D2 (Fragment)	-0.6	0.01
SWM	Unknown	NADH dehydrogenase [ubiquinone] 1 beta subcomplex subunit 11, mitochondrial (Complex I-ESSS) (CI-ESSS) (NADH-ubiquinone oxidoreductase ESSS subunit) (Neuronal protein 15.6) (Np15.6) (p15.6)	-0.6	0.01
SWM	bacteriohopane-32,33,34-triol-35-carbamate	Ankyrin repeat domain-containing protein 37	-0.599	0.01
SWM	Diketospirilloxanthin/ 2,2'-Diketospirilloxanthin	unknown	-0.599	0.01
SWM	2-Hydroxyadipic acid	Protein transport protein Sec61 subunit gamma	-0.599	0.04
SWM	Unknown	Ribosomal protein	-0.599	0.03
SWM	Unknown	Transmembrane protein 205 (Fragment)	-0.599	0.05
SWM	Unknown	unknown	-0.598	0.04
SWM	4-Oxo-4-(3-pyridyl)-butanamide	Ribosomal protein	-0.597	0.05
SWM	Tyramine	unknown	-0.597	0.02
SWM	Unknown	Eukaryotic translation initiation factor 3 subunit I (eIF3i) (Eukaryotic translation initiation factor 3 subunit 2) (eIF-3-beta) (eIF3 p36)	-0.597	0.01
SWM	Unknown	Liver-expressed antimicrobial peptide 2 (LEAP-2)	-0.596	0.02
SWM	Unknown	unknown	-0.596	0.05
SWM	Unknown	G1/S-specific cyclin-D2 (Fragment)	-0.596	0
SWM	Unknown	Ankyrin repeat domain-containing protein 37	-0.596	0.02
SWM	3-Carboxy-cis,cis-muconate	Mitochondrial import inner membrane translocase subunit Tim22	-0.595	0.03
SWM	Unknown	MCG116671	-0.595	0.01
SWM	Unknown	Ribosomal protein	-0.595	0.04
SWM	Unknown	Eukaryotic translation initiation factor 3 subunit I (eIF3i) (Eukaryotic translation initiation factor 3 subunit 2) (eIF-3-beta) (eIF3 p36)	-0.595	0.03
SWM	Unknown	unknown	-0.595	0.03
SWM	Unknown	Beta-crystallin B3 (Fragment)	-0.595	0.04
SWM	Unknown	Protein PET100 homolog, mitochondrial	-0.595	0.04
SWM	1-hexadecyl-2-(5Z,8Z,11Z,14Z,17Z-eicosapentaenoyl)-sn-glycero-3-phosphate	Proteasome subunit beta type (EC 3.4.25.1)	-0.594	0.05
SWM	Unknown	Transcription factor MafB (Maf-B) (Kreisler) (Segmentation protein Kr) (Transcription factor Maf-1) (V-maf musculoaponeurotic fibrosarcoma oncogene homolog B)	-0.594	0.01
SWM	Unknown	unknown	-0.593	0.04
SWM	Unknown	unknown	-0.593	0.05
SWM	Unknown	unknown	-0.593	0.05
SWM	Unknown	unknown	-0.593	0.05
SWM	Unknown	Eukaryotic translation initiation factor 3 subunit K	-0.593	0.04
SWM	9,10-dichloro-octadecanoic acid	Proteasome subunit beta type-3 (EC 3.4.25.1) (Proteasome chain 13) (Proteasome component C10-II) (Proteasome theta chain)	-0.592	0.03
SWM	4-Oxo-4-(3-pyridyl)-butanamide	Transmembrane protein 163 (Synaptic vesicle membrane protein of 31 kDa)	-0.592	0.05
SWM	Glucosylceramide	Uncharacterized protein	-0.592	0.05
SWM	Micropine	unknown	-0.592	0.04
SWM	Unknown	unknown	-0.592	0.02
SWM	Unknown	Proteasome subunit beta type-3 (EC 3.4.25.1) (Proteasome chain 13) (Proteasome component C10-II) (Proteasome theta chain)	-0.592	0.05
SWM	bacteriohopane-32,33,34-triol-35-carbamate	unknown	-0.591	0.05
SWM	1-hexadecyl-2-(5Z,8Z,11Z,14Z,17Z-eicosapentaenoyl)-sn-glycero-3-phosphate	unknown	-0.591	0.04
SWM	4-Oxo-4-(3-pyridyl)-butanamide	unknown	-0.591	0.05
SWM	Glucosylceramide	unknown	-0.591	0.05
SWM	Unknown	Ankyrin repeat domain-containing protein 37	-0.591	0
SWM	Phenylethyl alcohol	unknown	-0.59	0.02
SWM	Unknown	Liver-expressed antimicrobial peptide 2 (LEAP-2)	-0.59	0.05
SWM	Unknown	MCG116671	-0.59	0.05
SWM	Unknown	Protein PET100 homolog, mitochondrial	-0.59	0.05
SWM	bacteriohopane-32,33,34-triol-35-carbamate	unknown	-0.589	0.05
SWM	4-(2-Aminophenyl)-2,4-dioxobutanoic acid	NADH dehydrogenase [ubiquinone] 1 beta subcomplex subunit 11, mitochondrial (Complex I-ESSS) (CI-ESSS) (NADH-ubiquinone oxidoreductase ESSS subunit) (Neuronal protein 15.6) (Np15.6) (p15.6)	-0.589	0.03
SWM	Unknown	40S ribosomal protein S15	-0.589	0.02
SWM	Unknown	Histidine triad nucleotide-binding protein 1 (EC 3.-.-.-) (Adenosine 5'-monophosphoramidase) (Protein kinase C inhibitor 1) (Protein kinase C-interacting protein 1) (PKCI-1)	-0.589	0.03
SWM	Unknown	40S ribosomal protein S10	-0.589	0.02
SWM	Isovalerylglutamic acid	unknown	-0.588	0.04
SWM	Unknown	Tyrosine-protein kinase ZAP-70 (Fragment)	-0.588	0.04
SWM	Unknown	MCG54087 (Serine (or cysteine) peptidase inhibitor, clade A (alpha-1 antiproteinase, antitrypsin), member 3J)	-0.588	0.05
SWM	Unknown	Mrpl20 protein	-0.588	0.05
SWM	Unknown	unknown	-0.588	0.04
SWM	Micropine	unknown	-0.587	0.03
SWM	Isovalerylglutamic acid	Iodothyronine deiodinase	-0.586	0.05
SWM	Unknown	Mitochondrial import inner membrane translocase subunit Tim22	-0.586	0.04
SWM	Unknown	unknown	-0.586	0.05
SWM	3-Carboxy-cis,cis-muconate	unknown	-0.585	0.04
SWM	Unknown	Oxygen-dependent coproporphyrinogen-III oxidase, mitochondrial (COX) (Coprogen oxidase) (Coproporphyrinogenase) (EC 1.3.3.3)	-0.585	0.05
SWM	Unknown	Transcription factor MafB (Maf-B) (Kreisler) (Segmentation protein Kr) (Transcription factor Maf-1) (V-maf musculoaponeurotic fibrosarcoma oncogene homolog B)	-0.585	0
SWM	2-Methyl-3-hydroxybutyric acid	Apolipoprotein C-II (Apo-CII) (ApoC-II) (Apolipoprotein C2)	-0.584	0.05
SWM	Unknown	Uncharacterized protein (Fragment)	-0.584	0.01
SWM	Unknown	unknown	-0.584	0.01
SWM	Unknown	unknown	-0.584	0.04
SWM	9,10-dichloro-octadecanoic acid	Uncharacterized protein	-0.583	0.05
SWM	Unknown	Uncharacterized protein	-0.583	0.04
SWM	Unknown	unknown	-0.583	0.04
SWM	1-Methylpyrrolinium	Transmembrane protein 256	-0.582	0.04
SWM	Aminoadipic acid	Beta-crystallin B3 (Fragment)	-0.582	0.02
SWM	Unknown	Oxygen-dependent coproporphyrinogen-III oxidase, mitochondrial (COX) (Coprogen oxidase) (Coproporphyrinogenase) (EC 1.3.3.3)	-0.581	0.03
SWM	Unknown	unknown	-0.581	0.02
SWM	Unknown	unknown	-0.581	0.05
SWM	5-Hydroxyindoleacetic acid	unknown	-0.58	0.03
SWM	Unknown	unknown	-0.58	0.05
SWM	bacteriohopane-32,33,34-triol-35-carbamate	Transcription factor MafB (Maf-B) (Kreisler) (Segmentation protein Kr) (Transcription factor Maf-1) (V-maf musculoaponeurotic fibrosarcoma oncogene homolog B)	-0.579	0.04
SWM	Glucosylceramide	Oxygen-dependent coproporphyrinogen-III oxidase, mitochondrial (COX) (Coprogen oxidase) (Coproporphyrinogenase) (EC 1.3.3.3)	-0.579	0.05
SWM	Unknown	unknown	-0.579	0.05
SWM	Unknown	Beta-crystallin B3 (Fragment)	-0.579	0.04
SWM	Unknown	Beta-crystallin B3 (Fragment)	-0.579	0.04
SWM	Unknown	unknown	-0.579	0.05
SWM	Unknown	unknown	-0.578	0.04
SWM	15(S)-Hydroxyeicosatrienoic acid	unknown	-0.577	0.04
SWM	2-Methyl-3-hydroxybutyric acid	unknown	-0.577	0.05
SWM	Unknown	unknown	-0.577	0.04
SWM	Unknown	Transmembrane protein 163 (Synaptic vesicle membrane protein of 31 kDa)	-0.576	0.03
SWM	Unknown	Oxygen-dependent coproporphyrinogen-III oxidase, mitochondrial (COX) (Coprogen oxidase) (Coproporphyrinogenase) (EC 1.3.3.3)	-0.576	0.03
SWM	Unknown	Ankyrin repeat domain-containing protein 37	-0.576	0.01
SWM	3-Carboxy-cis,cis-muconate	Ribosomal protein	-0.575	0.05
SWM	4-Hydroxybenzoic acid	Ribosomal protein	-0.575	0.05
SWM	Unknown	Tetratricopeptide repeat protein 8 (Fragment)	-0.575	0
SWM	Unknown	unknown	-0.575	0.04
SWM	Unknown	Transcription factor MafB (Maf-B) (Kreisler) (Segmentation protein Kr) (Transcription factor Maf-1) (V-maf musculoaponeurotic fibrosarcoma oncogene homolog B)	-0.575	0.03
SWM	Unknown	Transmembrane protein 205 (Fragment)	-0.575	0.04
SWM	3-Carboxy-cis,cis-muconate	unknown	-0.574	0.04
SWM	Simvastatin	unknown	-0.574	0.05
SWM	Unknown	Histidine triad nucleotide-binding protein 1 (EC 3.-.-.-) (Adenosine 5'-monophosphoramidase) (Protein kinase C inhibitor 1) (Protein kinase C-interacting protein 1) (PKCI-1)	-0.574	0.02
SWM	9,10-dichloro-octadecanoic acid	unknown	-0.573	0.04
SWM	9,10-dichloro-octadecanoic acid	Spermatogenesis-associated protein 5 (Spermatogenesis-associated factor protein)	-0.573	0.01
SWM	2-Methyl-3-hydroxybutyric acid	unknown	-0.573	0.03
SWM	Unknown	unknown	-0.573	0.05
SWM	Unknown	Transcription factor MafB (Maf-B) (Kreisler) (Segmentation protein Kr) (Transcription factor Maf-1) (V-maf musculoaponeurotic fibrosarcoma oncogene homolog B)	-0.573	0.03
SWM	Unknown	Zinc finger protein 787 (Fragment)	-0.572	0.03
SWM	4-Hydroxybenzoic acid	unknown	-0.571	0.05
SWM	Homoanserine	unknown	-0.571	0
SWM	Isopropanol	40S ribosomal protein S27	-0.571	0.05
SWM	Unknown	ATP-citrate synthase (EC 2.3.3.8) (ATP-citrate (pro-S-)-lyase) (Citrate cleavage enzyme)	-0.571	0.05
SWM	Unknown	Beta-crystallin B3 (Fragment)	-0.571	0.05
SWM	Homoanserine	Vesicular glutamate transporter 3	-0.57	0.05
SWM	Homoanserine	Major urinary protein 18	-0.57	0.05
SWM	L-Acetylcarnitine	Beta-crystallin B3 (Fragment)	-0.57	0.03
SWM	Unknown	60S ribosomal protein L11	-0.57	0.05
SWM	Unknown	G1/S-specific cyclin-D2 (Fragment)	-0.57	0
SWM	2-Indolecarboxylic acid	Mitochondrial import inner membrane translocase subunit Tim22	-0.569	0.05
SWM	Unknown	Transcription factor MafB (Maf-B) (Kreisler) (Segmentation protein Kr) (Transcription factor Maf-1) (V-maf musculoaponeurotic fibrosarcoma oncogene homolog B)	-0.568	0.01
SWM	Unknown	Beta-crystallin B3 (Fragment)	-0.568	0.03
SWM	Unknown	Beta-crystallin B3 (Fragment)	-0.567	0.05
SWM	Unknown	unknown	-0.567	0.02
SWM	Unknown	unknown	-0.567	0.05
SWM	alpha-Tocopherol acetate	Testis development-related protein	-0.566	0.02
SWM	Unknown	Uncharacterized protein	-0.565	0.05
SWM	Unknown	unknown	-0.565	0.04
SWM	Unknown	Uncharacterized protein	-0.564	0.03
SWM	5beta-cholestane	unknown	-0.563	0.04
SWM	Imidazol-5-yl-pyruvate	Tyrosine-protein kinase ZAP-70 (Fragment)	-0.563	0.02
SWM	Unknown	G1/S-specific cyclin-D2 (Fragment)	-0.563	0.03
SWM	Unknown	Ubiquitin carboxyl-terminal hydrolase 45 (Fragment)	-0.562	0.05
SWM	bacteriohopane-32,33,34-triol-35-carbamate	G1/S-specific cyclin-D2 (Fragment)	-0.561	0.03
SWM	alpha-Tocopherol acetate	Oxygen-dependent coproporphyrinogen-III oxidase, mitochondrial (COX) (Coprogen oxidase) (Coproporphyrinogenase) (EC 1.3.3.3)	-0.561	0.02
SWM	Homoanserine	Integrin alpha 9 protein	-0.561	0.03
SWM	Unknown	Oxygen-dependent coproporphyrinogen-III oxidase, mitochondrial (COX) (Coprogen oxidase) (Coproporphyrinogenase) (EC 1.3.3.3)	-0.561	0.05
SWM	Unknown	Ribosomal protein	-0.561	0.03
SWM	Unknown	Beta-crystallin B3 (Fragment)	-0.561	0.02
SWM	Glucosylceramide	Succinate dehydrogenase [ubiquinone] iron-sulfur subunit, mitochondrial (EC 1.3.5.1) (Iron-sulfur subunit of complex II) (Ip)	-0.56	0.04
SWM	Simvastatin	unknown	-0.56	0.01
SWM	Unknown	Ankyrin repeat domain-containing protein 37	-0.56	0.01
SWM	Unknown	unknown	-0.56	0.04
SWM	Unknown	Mitochondrial import inner membrane translocase subunit Tim22	-0.559	0.05
SWM	Unknown	Transcription factor MafB (Maf-B) (Kreisler) (Segmentation protein Kr) (Transcription factor Maf-1) (V-maf musculoaponeurotic fibrosarcoma oncogene homolog B)	-0.559	0.03
SWM	Unknown	40S ribosomal protein S27	-0.559	0.02
SWM	Unknown	Major urinary protein 15	-0.559	0.04
SWM	Unknown	Testis development-related protein	-0.559	0.05
SWM	Unknown	Neutral cholesterol ester hydrolase 1	-0.558	0.04
SWM	Unknown	Ubiquitin carboxyl-terminal hydrolase 45 (Fragment)	-0.558	0.03
SWM	Unknown	unknown	-0.558	0.04
SWM	alpha-Tocopherol acetate	G1/S-specific cyclin-D2 (Fragment)	-0.557	0
SWM	Unknown	Transmembrane protein 163 (Synaptic vesicle membrane protein of 31 kDa)	-0.557	0.05
SWM	9,10-dichloro-octadecanoic acid	G1/S-specific cyclin-D2 (Fragment)	-0.556	0.01
SWM	N-Acetyl-L-phenylalanine	Neutral cholesterol ester hydrolase 1	-0.556	0.05
SWM	Unknown	unknown	-0.556	0.05
SWM	Unknown	Serine (Or cysteine) peptidase inhibitor, clade A, member 3C	-0.556	0.04
SWM	Unknown	unknown	-0.556	0.04
SWM	Unknown	40S ribosomal protein S14	-0.556	0.02
SWM	Unknown	Proteasome subunit beta type (EC 3.4.25.1)	-0.556	0.05
SWM	Unknown	unknown	-0.556	0.01
SWM	9,10-dichloro-octadecanoic acid	PH and SEC7 domain-containing protein 4 (Exchange factor for ADP-ribosylation factor guanine nucleotide factor 6 B) (Exchange factor for ARF6 B) (Pleckstrin homology and SEC7 domain-containing protein 4)	-0.555	0.05
SWM	Unknown	unknown	-0.555	0.05
SWM	Unknown	unknown	-0.554	0.01
SWM	Unknown	unknown	-0.553	0.05
SWM	Unknown	unknown	-0.552	0.01
SWM	Unknown	G1/S-specific cyclin-D2 (Fragment)	-0.552	0.03
SWM	Unknown	Brain mitochondrial carrier protein 1	-0.552	0.01
SWM	Unknown	tRNA wybutosine-synthesizing protein 5 (EC 1.14.11.42) (tRNA(Phe) (7-(3-amino-3-carboxypropyl)wyosine(37)-C(2))-hydroxylase)	-0.55	0.01
SWM	Unknown	Spermatogenesis-associated protein 5 (Spermatogenesis-associated factor protein)	-0.55	0.03
SWM	15(S)-Hydroxyeicosatrienoic acid	Beta-crystallin B3 (Fragment)	-0.549	0.05
SWM	Unknown	unknown	-0.549	0.04
SWM	Unknown	Testis development-related protein	-0.549	0
SWM	Mevalonic acid	B9 domain-containing protein 1 (Fragment)	-0.547	0.05
SWM	bacteriohopane-32,33,34-triol-35-carbamate	unknown	-0.546	0.02
SWM	1-Pyrroline-5-carboxylic acid	Mitochondrial import inner membrane translocase subunit Tim22	-0.546	0.05
SWM	Unknown	Uncharacterized protein	-0.546	0.04
SWM	Unknown	unknown	-0.546	0.04
SWM	1-Pyrroline-5-carboxylic acid	unknown	-0.545	0.05
SWM	alpha-Tocopherol acetate	unknown	-0.545	0.04
SWM	D-Lactaldehyde	unknown	-0.545	0.05
SWM	Tropinone	Vesicular glutamate transporter 3	-0.545	0.04
SWM	Unknown	Transcription factor MafB (Maf-B) (Kreisler) (Segmentation protein Kr) (Transcription factor Maf-1) (V-maf musculoaponeurotic fibrosarcoma oncogene homolog B)	-0.545	0.03
SWM	Unknown	Acetoacetyl-CoA synthetase (EC 6.2.1.16)	-0.545	0.05
SWM	Unknown	unknown	-0.545	0.03
SWM	Unknown	Testis development-related protein	-0.544	0.01
SWM	Unknown	Testis development-related protein	-0.544	0.01
SWM	Unknown	Stefin A2 protein	-0.543	0.03
SWM	alpha-Tocopherol acetate	Transcription factor MafB (Maf-B) (Kreisler) (Segmentation protein Kr) (Transcription factor Maf-1) (V-maf musculoaponeurotic fibrosarcoma oncogene homolog B)	-0.542	0.05
SWM	Unknown	Beta-crystallin B3 (Fragment)	-0.542	0.05
SWM	Unknown	unknown	-0.542	0.03
SWM	Glucosylceramide	40S ribosomal protein S25	-0.541	0.04
SWM	Unknown	PH and SEC7 domain-containing protein 4 (Exchange factor for ADP-ribosylation factor guanine nucleotide factor 6 B) (Exchange factor for ARF6 B) (Pleckstrin homology and SEC7 domain-containing protein 4)	-0.541	0.03
SWM	Unknown	Proteasome subunit beta type-3 (EC 3.4.25.1) (Proteasome chain 13) (Proteasome component C10-II) (Proteasome theta chain)	-0.54	0.04
SWM	Unknown	ATP-citrate synthase (EC 2.3.3.8) (ATP-citrate (pro-S-)-lyase) (Citrate cleavage enzyme)	-0.539	0.04
SWM	Unknown	G1/S-specific cyclin-D2 (Fragment)	-0.539	0.05
SWM	Unknown	39S ribosomal protein L23, mitochondrial	-0.539	0.04
SWM	Diketospirilloxanthin/ 2,2'-Diketospirilloxanthin	Uncharacterized protein (Fragment)	-0.538	0.05
SWM	alpha-Tocopherol acetate	unknown	-0.538	0.03
SWM	Unknown	Vesicular glutamate transporter 3	-0.538	0.03
SWM	Unknown	unknown	-0.538	0.04
SWM	Unknown	Brain mitochondrial carrier protein 1	-0.538	0.01
SWM	Isopropanol	unknown	-0.536	0.05
SWM	Unknown	Intraflagellar transport protein 22 homolog (Fragment)	-0.536	0.05
SWM	Unknown	unknown	-0.536	0.05
SWM	Unknown	unknown	-0.536	0.02
SWM	Unknown	unknown	-0.536	0.03
SWM	alpha-Tocopherol acetate	Spermatogenesis-associated protein 5 (Spermatogenesis-associated factor protein)	-0.535	0.01
SWM	Unknown	Transcription factor MafB (Maf-B) (Kreisler) (Segmentation protein Kr) (Transcription factor Maf-1) (V-maf musculoaponeurotic fibrosarcoma oncogene homolog B)	-0.535	0.05
SWM	Unknown	G1/S-specific cyclin-D2 (Fragment)	-0.535	0.04
SWM	Unknown	Testis development-related protein	-0.535	0.04
SWM	Aminoadipic acid	Transmembrane protein 163 (Synaptic vesicle membrane protein of 31 kDa)	-0.534	0.05
SWM	Homoanserine	unknown	-0.534	0.04
SWM	Tyramine	Transmembrane protein 163 (Synaptic vesicle membrane protein of 31 kDa)	-0.534	0.03
SWM	Tyramine	Stefin A2 protein	-0.534	0.04
SWM	Unknown	G1/S-specific cyclin-D2 (Fragment)	-0.534	0.01
SWM	Hexatriacontapentaenoic acid	G1/S-specific cyclin-D2 (Fragment)	-0.532	0.02
SWM	Unknown	unknown	-0.532	0.02
SWM	bacteriohopane-32,33,34-triol-35-carbamate	Acetoacetyl-CoA synthetase (EC 6.2.1.16)	-0.531	0.05
SWM	Unknown	Uncharacterized protein (Fragment)	-0.531	0.05
SWM	Micropine	unknown	-0.53	0.02
SWM	Unknown	unknown	-0.53	0.03
SWM	3-Hexanone	40S ribosomal protein S5 [Cleaved into: 40S ribosomal protein S5, N-terminally processed]	-0.529	0.05
SWM	Unknown	unknown	-0.529	0.05
SWM	Unknown	unknown	-0.528	0.02
SWM	Unknown	Transcription factor MafB (Maf-B) (Kreisler) (Segmentation protein Kr) (Transcription factor Maf-1) (V-maf musculoaponeurotic fibrosarcoma oncogene homolog B)	-0.528	0.05
SWM	(22R)-1alpha,25-dihydroxy-22-methoxy-26,27-dimethyl-23,23,24,24-tetradehydro-24a-homovitamin D3	Ubiquitin carboxyl-terminal hydrolase 45 (Fragment)	-0.527	0.04
SWM	Unknown	tRNA-specific adenosine deaminase 1 (mADAT1) (EC 3.5.4.34) (tRNA-specific adenosine-37 deaminase)	-0.527	0.05
SWM	N-Acetyl-L-phenylalanine	unknown	-0.526	0.03
SWM	Unknown	Spermatogenesis-associated protein 5 (Spermatogenesis-associated factor protein)	-0.526	0.02
SWM	Unknown	Testis development-related protein	-0.525	0.04
SWM	Glucosylceramide	Spermatogenesis-associated protein 5 (Spermatogenesis-associated factor protein)	-0.524	0.05
SWM	Unknown	unknown	-0.524	0.05
SWM	Unknown	unknown	-0.523	0.03
SWM	Unknown	Spermatogenesis-associated protein 5 (Spermatogenesis-associated factor protein)	-0.523	0.04
SWM	Unknown	Ubiquitin carboxyl-terminal hydrolase 45 (Fragment)	-0.523	0.05
SWM	9,10-dichloro-octadecanoic acid	Transcription factor MafB (Maf-B) (Kreisler) (Segmentation protein Kr) (Transcription factor Maf-1) (V-maf musculoaponeurotic fibrosarcoma oncogene homolog B)	-0.52	0.02
SWM	Behenic acid	unknown	-0.52	0.04
SWM	Unknown	Tetratricopeptide repeat protein 8 (Fragment)	-0.52	0.01
SWM	Unknown	unknown	-0.52	0.05
SWM	Unknown	G1/S-specific cyclin-D2 (Fragment)	-0.52	0.04
SWM	Unknown	40S ribosomal protein S5 [Cleaved into: 40S ribosomal protein S5, N-terminally processed]	-0.52	0.03
SWM	4-Oxo-4-(3-pyridyl)-butanamide	unknown	-0.519	0.04
SWM	9,10-dichloro-octadecanoic acid	Neutral cholesterol ester hydrolase 1	-0.518	0.04
SWM	Glucosylceramide	Histidine triad nucleotide-binding protein 1 (EC 3.-.-.-) (Adenosine 5'-monophosphoramidase) (Protein kinase C inhibitor 1) (Protein kinase C-interacting protein 1) (PKCI-1)	-0.518	0.05
SWM	Unknown	Uncharacterized protein	-0.518	0.02
SWM	Unknown	Spermatogenesis-associated protein 5 (Spermatogenesis-associated factor protein)	-0.518	0.04
SWM	Unknown	DNA repair protein XRCC3 (X-ray repair cross-complementing protein 3)	-0.517	0.01
SWM	9,10-dichloro-octadecanoic acid	Tetratricopeptide repeat protein 8 (Fragment)	-0.516	0.01
SWM	9,10-dichloro-octadecanoic acid	Brain mitochondrial carrier protein 1	-0.516	0.02
SWM	L-Acetylcarnitine	unknown	-0.515	0.04
SWM	Unknown	unknown	-0.514	0.01
SWM	Unknown	Tetratricopeptide repeat protein 8 (Fragment)	-0.514	0.02
SWM	Unknown	Myeloid-derived growth factor (MYDGF) (Interleukin-25) (IL-25) (Stromal cell-derived growth factor SF20)	-0.514	0.05
SWM	Unknown	Testis development-related protein	-0.514	0.02
SWM	Unknown	Brain mitochondrial carrier protein 1	-0.514	0.02
SWM	Unknown	Transforming acidic coiled-coil-containing protein 3 (ARNT-interacting protein)	-0.513	0.01
SWM	Unknown	Ubiquitin carboxyl-terminal hydrolase 45 (Fragment)	-0.512	0.03
SWM	Unknown	Brain mitochondrial carrier protein 1	-0.512	0
SWM	bacteriohopane-32,33,34-triol-35-carbamate	Tetratricopeptide repeat protein 8 (Fragment)	-0.511	0
SWM	Tropinone	unknown	-0.511	0.05
SWM	9,10-dichloro-octadecanoic acid	tRNA wybutosine-synthesizing protein 5 (EC 1.14.11.42) (tRNA(Phe) (7-(3-amino-3-carboxypropyl)wyosine(37)-C(2))-hydroxylase)	-0.51	0.02
SWM	L-Acetylcarnitine	tRNA-specific adenosine deaminase 1 (mADAT1) (EC 3.5.4.34) (tRNA-specific adenosine-37 deaminase)	-0.51	0.01
SWM	Unknown	tRNA wybutosine-synthesizing protein 5 (EC 1.14.11.42) (tRNA(Phe) (7-(3-amino-3-carboxypropyl)wyosine(37)-C(2))-hydroxylase)	-0.51	0.04
SWM	Unknown	Tetratricopeptide repeat protein 8 (Fragment)	-0.509	0.02
SWM	Unknown	unknown	-0.506	0.03
SWM	Unknown	RNA exonuclease 5 short isoform (Fragment)	-0.505	0.03
SWM	Unknown	Testis development-related protein	-0.505	0.02
SWM	Unknown	Transforming acidic coiled-coil-containing protein 3 (ARNT-interacting protein)	-0.504	0
SWM	Hexatriacontapentaenoic acid	unknown	-0.503	0.04
SWM	Unknown	tRNA wybutosine-synthesizing protein 5 (EC 1.14.11.42) (tRNA(Phe) (7-(3-amino-3-carboxypropyl)wyosine(37)-C(2))-hydroxylase)	-0.503	0.03
SWM	Unknown	G1/S-specific cyclin-D2 (Fragment)	-0.503	0.04
SWM	Unknown	Testis development-related protein	-0.503	0.05
SWM	Unknown	unknown	-0.501	0.03
SWM	Glucosylceramide	Tetratricopeptide repeat protein 8 (Fragment)	-0.5	0.01
SWM	9,10-dichloro-octadecanoic acid	unknown	-0.495	0.04
SWM	Unknown	Attractin	-0.494	0
SWM	Hexatriacontapentaenoic acid	unknown	-0.493	0.04
SWM	Unknown	Agouti-related protein (Fragment)	-0.493	0.04
SWM	Unknown	Brain mitochondrial carrier protein 1	-0.492	0.01
SWM	Unknown	G1/S-specific cyclin-D2 (Fragment)	-0.491	0.05
SWM	Unknown	G1/S-specific cyclin-D2 (Fragment)	-0.491	0.01
SWM	Glucosylceramide	G1/S-specific cyclin-D2 (Fragment)	-0.49	0.05
SWM	Unknown	tRNA wybutosine-synthesizing protein 5 (EC 1.14.11.42) (tRNA(Phe) (7-(3-amino-3-carboxypropyl)wyosine(37)-C(2))-hydroxylase)	-0.489	0.05
SWM	Unknown	Integrator complex subunit 2 (Int2)	-0.487	0.04
SWM	Unknown	Transforming acidic coiled-coil-containing protein 3 (ARNT-interacting protein)	-0.487	0
SWM	Hexatriacontapentaenoic acid	Transforming acidic coiled-coil-containing protein 3 (ARNT-interacting protein)	-0.486	0
SWM	Unknown	PH and SEC7 domain-containing protein 4 (Exchange factor for ADP-ribosylation factor guanine nucleotide factor 6 B) (Exchange factor for ARF6 B) (Pleckstrin homology and SEC7 domain-containing protein 4)	-0.485	0.05
SWM	Unknown	Nuclear export mediator factor Nemf (Serologically defined colon cancer antigen 1 homolog)	-0.484	0.04
SWM	Glucosylceramide	unknown	-0.483	0.03
SWM	9,10-dichloro-octadecanoic acid	Zfp217 protein (Fragment)	-0.482	0.03
SWM	Unknown	Tetratricopeptide repeat protein 8 (Fragment)	-0.482	0.02
SWM	Unknown	DNA repair protein XRCC3 (X-ray repair cross-complementing protein 3)	-0.481	0.01
SWM	Unknown	Transforming acidic coiled-coil-containing protein 3 (ARNT-interacting protein)	-0.481	0
SWM	Unknown	unknown	-0.481	0.05
SWM	Unknown	tRNA wybutosine-synthesizing protein 5 (EC 1.14.11.42) (tRNA(Phe) (7-(3-amino-3-carboxypropyl)wyosine(37)-C(2))-hydroxylase)	-0.48	0.03
SWM	bacteriohopane-32,33,34-triol-35-carbamate	Brain mitochondrial carrier protein 1	-0.479	0.04
SWM	Unknown	Tetratricopeptide repeat protein 8 (Fragment)	-0.477	0
SWM	Unknown	Zfp217 protein (Fragment)	-0.477	0.03
SWM	Unknown	unknown	-0.476	0.04
SWM	bacteriohopane-32,33,34-triol-35-carbamate	unknown	-0.475	0.02
SWM	Unknown	tRNA-specific adenosine deaminase 1 (mADAT1) (EC 3.5.4.34) (tRNA-specific adenosine-37 deaminase)	-0.474	0.03
SWM	Unknown	Spermatogenesis-associated protein 5 (Spermatogenesis-associated factor protein)	-0.473	0.05
SWM	Unknown	Testis development-related protein	-0.473	0.05
SWM	Unknown	unknown	-0.472	0.04
SWM	Unknown	Brain mitochondrial carrier protein 1	-0.47	0.04
SWM	Unknown	unknown	-0.468	0.05
SWM	Unknown	Tetratricopeptide repeat protein 8 (Fragment)	-0.468	0.02
SWM	Unknown	Transforming acidic coiled-coil-containing protein 3 (ARNT-interacting protein)	-0.467	0
SWM	2-Octenedioic acid	Nuclear export mediator factor Nemf (Serologically defined colon cancer antigen 1 homolog)	-0.465	0.04
SWM	Unknown	Transforming acidic coiled-coil-containing protein 3 (ARNT-interacting protein)	-0.464	0
SWM	alpha-Tocopherol acetate	DNA repair protein XRCC3 (X-ray repair cross-complementing protein 3)	-0.462	0.05
SWM	Unknown	unknown	-0.461	0.04
SWM	Unknown	Integrator complex subunit 2 (Int2)	-0.46	0.02
SWM	Unknown	unknown	-0.46	0.04
SWM	2-Octenedioic acid	Palmitoyltransferase ZDHHC2 (EC 2.3.1.225) (Zinc finger DHHC domain-containing protein 2) (DHHC-2)	-0.459	0.03
SWM	Unknown	Tetratricopeptide repeat protein 8 (Fragment)	-0.459	0.02
SWM	Unknown	Brain mitochondrial carrier protein 1	-0.459	0.05
SWM	Unknown	tRNA wybutosine-synthesizing protein 5 (EC 1.14.11.42) (tRNA(Phe) (7-(3-amino-3-carboxypropyl)wyosine(37)-C(2))-hydroxylase)	-0.458	0.01
SWM	Unknown	Brain mitochondrial carrier protein 1	-0.457	0.05
SWM	Unknown	RNA exonuclease 5 short isoform (Fragment)	-0.455	0.02
SWM	Unknown	Attractin	-0.454	0.02
SWM	Unknown	unknown	-0.454	0.04
SWM	Unknown	Integrator complex subunit 2 (Int2)	-0.452	0.03
SWM	Unknown	DNA repair protein XRCC3 (X-ray repair cross-complementing protein 3)	-0.452	0.04
SWM	Unknown	Transforming acidic coiled-coil-containing protein 3 (ARNT-interacting protein)	-0.452	0.01
SWM	9,10-dichloro-octadecanoic acid	Integrator complex subunit 2 (Int2)	-0.45	0.05
SWM	alpha-Tocopherol acetate	Brain mitochondrial carrier protein 1	-0.447	0.04
SWM	Unknown	Transforming acidic coiled-coil-containing protein 3 (ARNT-interacting protein)	-0.447	0.01
SWM	Unknown	Attractin	-0.443	0.02
SWM	Unknown	Agouti-related protein (Fragment)	-0.442	0.02
SWM	Unknown	RNA exonuclease 5 short isoform (Fragment)	-0.441	0.02
SWM	Unknown	RNA exonuclease 5 short isoform (Fragment)	-0.441	0.04
SWM	Unknown	tRNA wybutosine-synthesizing protein 5 (EC 1.14.11.42) (tRNA(Phe) (7-(3-amino-3-carboxypropyl)wyosine(37)-C(2))-hydroxylase)	-0.439	0.02
SWM	Unknown	Attractin	-0.438	0.03
SWM	Unknown	unknown	-0.438	0.04
SWM	Glucosylceramide	Attractin	-0.437	0.02
SWM	Unknown	Integrator complex subunit 2 (Int2)	-0.436	0.03
SWM	Unknown	Transforming acidic coiled-coil-containing protein 3 (ARNT-interacting protein)	-0.436	0.01
SWM	9,10-dichloro-octadecanoic acid	Attractin	-0.435	0.01
SWM	Glucosylceramide	Brain mitochondrial carrier protein 1	-0.434	0.03
SWM	alpha-Tocopherol acetate	Attractin	-0.433	0.02
SWM	Unknown	unknown	-0.433	0.03
SWM	Unknown	RNA exonuclease 5 short isoform (Fragment)	-0.432	0.05
SWM	Unknown	Attractin	-0.429	0.04
SWM	Unknown	Transforming acidic coiled-coil-containing protein 3 (ARNT-interacting protein)	-0.429	0.01
SWM	Unknown	Brain mitochondrial carrier protein 1	-0.429	0.01
SWM	Unknown	unknown	-0.428	0.04
SWM	Unknown	Tetratricopeptide repeat protein 8 (Fragment)	-0.428	0.05
SWM	Unknown	Attractin	-0.428	0.03
SWM	Unknown	unknown	-0.427	0.04
SWM	Unknown	Transforming acidic coiled-coil-containing protein 3 (ARNT-interacting protein)	-0.427	0.01
SWM	9,10-dichloro-octadecanoic acid	Transforming acidic coiled-coil-containing protein 3 (ARNT-interacting protein)	-0.426	0
SWM	Glucosylceramide	Transforming acidic coiled-coil-containing protein 3 (ARNT-interacting protein)	-0.425	0.01
SWM	Unknown	unknown	-0.425	0.03
SWM	bacteriohopane-32,33,34-triol-35-carbamate	Attractin	-0.424	0
SWM	alpha-Tocopherol acetate	Tetratricopeptide repeat protein 8 (Fragment)	-0.424	0.05
SWM	Homoanserine	Nuclear export mediator factor Nemf (Serologically defined colon cancer antigen 1 homolog)	-0.424	0.04
SWM	Unknown	Zfp217 protein (Fragment)	-0.42	0.05
SWM	Unknown	RNA exonuclease 5 short isoform (Fragment)	-0.42	0.01
SWM	alpha-Tocopherol acetate	Transforming acidic coiled-coil-containing protein 3 (ARNT-interacting protein)	-0.418	0.03
SWM	Unknown	Brain mitochondrial carrier protein 1	-0.418	0.03
SWM	Unknown	DNA repair protein XRCC3 (X-ray repair cross-complementing protein 3)	-0.417	0.04
SWM	Unknown	Tetratricopeptide repeat protein 8 (Fragment)	-0.416	0.04
SWM	bacteriohopane-32,33,34-triol-35-carbamate	Transforming acidic coiled-coil-containing protein 3 (ARNT-interacting protein)	-0.415	0.02
SWM	Unknown	unknown	-0.414	0.04
SWM	Unknown	Attractin	-0.412	0.04
SWM	Hexatriacontapentaenoic acid	Brain mitochondrial carrier protein 1	-0.409	0.05
SWM	Unknown	RNA exonuclease 5 short isoform (Fragment)	-0.404	0.04
SWM	Unknown	Attractin	-0.403	0.05
SWM	Unknown	Brain mitochondrial carrier protein 1	-0.402	0.03
SWM	bacteriohopane-32,33,34-triol-35-carbamate	RNA exonuclease 5 short isoform (Fragment)	-0.401	0.05
SWM	Unknown	Transforming acidic coiled-coil-containing protein 3 (ARNT-interacting protein)	-0.401	0.02
SWM	Unknown	RNA exonuclease 5 short isoform (Fragment)	-0.4	0.02
SWM	Unknown	Transforming acidic coiled-coil-containing protein 3 (ARNT-interacting protein)	-0.395	0.03
SWM	Unknown	Attractin	-0.394	0.04
SWM	Unknown	Attractin	-0.381	0.04
SWM	Unknown	Transforming acidic coiled-coil-containing protein 3 (ARNT-interacting protein)	-0.38	0.03
SWM	Unknown	unknown	-0.377	0.04
SWM	alpha-Tocopherol acetate	RNA exonuclease 5 short isoform (Fragment)	-0.376	0.05
SWM	Unknown	Attractin	-0.343	0.05
SWM	2-Methyl-3-hydroxybutyric acid	Transforming acidic coiled-coil-containing protein 3 (ARNT-interacting protein)	0.306	0.05
SWM	Erucic acid	Transforming acidic coiled-coil-containing protein 3 (ARNT-interacting protein)	0.309	0.05
SWM	Unknown	Transforming acidic coiled-coil-containing protein 3 (ARNT-interacting protein)	0.331	0.05
SWM	2-Methyl-3-hydroxybutyric acid	Attractin	0.348	0.05
SWM	Unknown	Transforming acidic coiled-coil-containing protein 3 (ARNT-interacting protein)	0.352	0.02
SWM	Unknown	Transforming acidic coiled-coil-containing protein 3 (ARNT-interacting protein)	0.363	0.04
SWM	Unknown	Attractin	0.365	0.03
SWM	Unknown	Transforming acidic coiled-coil-containing protein 3 (ARNT-interacting protein)	0.365	0.03
SWM	Unknown	Attractin	0.376	0.04
SWM	2-Methyl-3-hydroxybutyric acid	Transforming acidic coiled-coil-containing protein 3 (ARNT-interacting protein)	0.378	0.04
SWM	2-Octenedioic acid	Attractin	0.378	0.03
SWM	Unknown	Attractin	0.379	0.05
SWM	Unknown	unknown	0.381	0.05
SWM	Imidazol-5-yl-pyruvate	Attractin	0.383	0.05
SWM	Unknown	Transforming acidic coiled-coil-containing protein 3 (ARNT-interacting protein)	0.384	0.02
SWM	Unknown	Brain mitochondrial carrier protein 1	0.384	0.04
SWM	Tropinone	Transforming acidic coiled-coil-containing protein 3 (ARNT-interacting protein)	0.393	0.01
SWM	3-Carboxy-cis,cis-muconate	Agouti-related protein (Fragment)	0.394	0.02
SWM	Unknown	Agouti-related protein (Fragment)	0.395	0.03
SWM	Unknown	tRNA wybutosine-synthesizing protein 5 (EC 1.14.11.42) (tRNA(Phe) (7-(3-amino-3-carboxypropyl)wyosine(37)-C(2))-hydroxylase)	0.4	0.02
SWM	Unknown	Transforming acidic coiled-coil-containing protein 3 (ARNT-interacting protein)	0.402	0.01
SWM	Unknown	HAUS augmin-like complex subunit 3	0.404	0.04
SWM	Unknown	Transforming acidic coiled-coil-containing protein 3 (ARNT-interacting protein)	0.406	0.01
SWM	Unknown	HAUS augmin-like complex subunit 3	0.408	0.03
SWM	Unknown	unknown	0.411	0.03
SWM	Unknown	Zfp217 protein (Fragment)	0.411	0.03
SWM	Erucic acid	Zfp217 protein (Fragment)	0.414	0.04
SWM	Unknown	Tetratricopeptide repeat protein 8 (Fragment)	0.414	0.04
SWM	Unknown	HAUS augmin-like complex subunit 3	0.414	0.04
SWM	Unknown	Agouti-related protein (Fragment)	0.414	0.04
SWM	L-Acetylcarnitine	Attractin	0.415	0.03
SWM	D-Lactaldehyde	HAUS augmin-like complex subunit 3	0.416	0.05
SWM	2-Hydroxyadipic acid	Brain mitochondrial carrier protein 1	0.419	0.03
SWM	Homoanserine	unknown	0.419	0.04
SWM	Unknown	unknown	0.42	0.03
SWM	2-Methyl-3-hydroxybutyric acid	HAUS augmin-like complex subunit 3	0.421	0.04
SWM	Unknown	unknown	0.421	0.04
SWM	Unknown	unknown	0.422	0.04
SWM	Unknown	Transforming acidic coiled-coil-containing protein 3 (ARNT-interacting protein)	0.422	0.03
SWM	4-(2-Aminophenyl)-2,4-dioxobutanoic acid	HAUS augmin-like complex subunit 3	0.423	0.04
SWM	Unknown	unknown	0.423	0.05
SWM	Unknown	Brain mitochondrial carrier protein 1	0.425	0.05
SWM	Futalosine	Agouti-related protein (Fragment)	0.427	0.05
SWM	Unknown	Attractin	0.427	0.01
SWM	Isovalerylglutamic acid	unknown	0.428	0.02
SWM	Unknown	GREB1-like protein	0.428	0.04
SWM	Mevalonic acid	Brain mitochondrial carrier protein 1	0.429	0.03
SWM	Unknown	HAUS augmin-like complex subunit 3	0.429	0.05
SWM	Erucic acid	unknown	0.43	0.03
SWM	Erucic acid	HAUS augmin-like complex subunit 3	0.43	0.04
SWM	Indolylacryloylglycine	unknown	0.431	0.05
SWM	2-Octenedioic acid	unknown	0.432	0.05
SWM	Unknown	unknown	0.433	0.04
SWM	3-Hexanone	unknown	0.434	0.04
SWM	4-Hydroxybenzoic acid	Tetratricopeptide repeat protein 8 (Fragment)	0.434	0.04
SWM	L-Acetylcarnitine	unknown	0.434	0.05
SWM	Unknown	unknown	0.435	0.04
SWM	Unknown	Nuclear export mediator factor Nemf (Serologically defined colon cancer antigen 1 homolog)	0.435	0.05
SWM	4-Hydroxybenzoic acid	Integrator complex subunit 2 (Int2)	0.437	0.05
SWM	Unknown	unknown	0.437	0.04
SWM	Unknown	G1/S-specific cyclin-D2 (Fragment)	0.437	0.03
SWM	Unknown	G1/S-specific cyclin-D2 (Fragment)	0.44	0.02
SWM	Unknown	Agouti-related protein (Fragment)	0.441	0.02
SWM	Unknown	Agouti-related protein (Fragment)	0.442	0.02
SWM	Unknown	unknown	0.442	0.05
SWM	Tropinone	Tetratricopeptide repeat protein 8 (Fragment)	0.443	0.03
SWM	Unknown	Zfp217 protein (Fragment)	0.443	0.04
SWM	Unknown	Zfp217 protein (Fragment)	0.444	0.04
SWM	Unknown	Transforming acidic coiled-coil-containing protein 3 (ARNT-interacting protein)	0.445	0.01
SWM	4-Hydroxybenzoic acid	Transforming acidic coiled-coil-containing protein 3 (ARNT-interacting protein)	0.446	0.01
SWM	Homoanserine	unknown	0.446	0.05
SWM	L-Acetylcarnitine	Agouti-related protein (Fragment)	0.446	0.04
SWM	Unknown	Attractin	0.447	0.01
SWM	Unknown	RNA exonuclease 5 short isoform (Fragment)	0.447	0.05
SWM	2-Hydroxyadipic acid	unknown	0.448	0.04
SWM	Tropinone	Agouti-related protein (Fragment)	0.448	0.04
SWM	Unknown	unknown	0.448	0.03
SWM	Simvastatin	Agouti-related protein (Fragment)	0.449	0.04
SWM	Unknown	Tetratricopeptide repeat protein 8 (Fragment)	0.449	0.01
SWM	4-(2-Aminophenyl)-2,4-dioxobutanoic acid	unknown	0.45	0
SWM	Unknown	unknown	0.452	0.04
SWM	Unknown	Tetratricopeptide repeat protein 8 (Fragment)	0.452	0.01
SWM	Unknown	Agouti-related protein (Fragment)	0.453	0.02
SWM	Glucosylceramide	unknown	0.454	0.05
SWM	Unknown	Palmitoyltransferase ZDHHC2 (EC 2.3.1.225) (Zinc finger DHHC domain-containing protein 2) (DHHC-2)	0.454	0.05
SWM	Unknown	Agouti-related protein (Fragment)	0.454	0.01
SWM	Unknown	Brain mitochondrial carrier protein 1	0.454	0.02
SWM	6-Dimethylaminopurine	Epsin-2	0.455	0.05
SWM	Unknown	unknown	0.455	0.02
SWM	Unknown	Attractin	0.455	0
SWM	Unknown	HAUS augmin-like complex subunit 3	0.455	0.02
SWM	Unknown	unknown	0.456	0.05
SWM	Unknown	unknown	0.456	0.05
SWM	Unknown	Agouti-related protein (Fragment)	0.457	0.05
SWM	6-Dimethylaminopurine	Brain mitochondrial carrier protein 1	0.458	0.02
SWM	6-Dimethylaminopurine	Transforming acidic coiled-coil-containing protein 3 (ARNT-interacting protein)	0.459	0
SWM	Unknown	DNA repair protein XRCC3 (X-ray repair cross-complementing protein 3)	0.459	0.04
SWM	Unknown	Zfp217 protein (Fragment)	0.459	0.03
SWM	6-Dimethylaminopurine	unknown	0.46	0.03
SWM	2-Methyl-3-hydroxybutyric acid	Zfp217 protein (Fragment)	0.461	0.05
SWM	4-Hydroxybenzoic acid	DNA repair protein XRCC3 (X-ray repair cross-complementing protein 3)	0.461	0.03
SWM	Tropinone	Attractin	0.461	0.03
SWM	Unknown	Attractin	0.461	0.01
SWM	Unknown	tRNA wybutosine-synthesizing protein 5 (EC 1.14.11.42) (tRNA(Phe) (7-(3-amino-3-carboxypropyl)wyosine(37)-C(2))-hydroxylase)	0.462	0.01
SWM	4-Hydroxybenzoic acid	HAUS augmin-like complex subunit 3	0.463	0.02
SWM	D-Lactaldehyde	unknown	0.463	0.03
SWM	2-Hydroxyadipic acid	Transforming acidic coiled-coil-containing protein 3 (ARNT-interacting protein)	0.464	0.01
SWM	N-Phenylacetylphenylalanine	unknown	0.464	0.03
SWM	Unknown	G1/S-specific cyclin-D2 (Fragment)	0.464	0.04
SWM	Unknown	Palmitoyltransferase ZDHHC2 (EC 2.3.1.225) (Zinc finger DHHC domain-containing protein 2) (DHHC-2)	0.465	0.05
SWM	Unknown	unknown	0.466	0
SWM	Unknown	unknown	0.466	0.05
SWM	Unknown	Attractin	0.468	0.01
SWM	Unknown	Zfp217 protein (Fragment)	0.468	0.04
SWM	Unknown	Transmembrane protein 192 (Fragment)	0.469	0.05
SWM	L-Acetylcarnitine	Tetratricopeptide repeat protein 8 (Fragment)	0.472	0.02
SWM	Unknown	unknown	0.472	0.01
SWM	Unknown	HAUS augmin-like complex subunit 3	0.472	0.02
SWM	D-Lactaldehyde	Palmitoyltransferase ZDHHC2 (EC 2.3.1.225) (Zinc finger DHHC domain-containing protein 2) (DHHC-2)	0.473	0.05
SWM	Lipoamide	Agouti-related protein (Fragment)	0.473	0.04
SWM	Unknown	PH and SEC7 domain-containing protein 4 (Exchange factor for ADP-ribosylation factor guanine nucleotide factor 6 B) (Exchange factor for ARF6 B) (Pleckstrin homology and SEC7 domain-containing protein 4)	0.473	0.05
SWM	Unknown	Transforming acidic coiled-coil-containing protein 3 (ARNT-interacting protein)	0.473	0.01
SWM	Unknown	Palmitoyltransferase ZDHHC2 (EC 2.3.1.225) (Zinc finger DHHC domain-containing protein 2) (DHHC-2)	0.473	0.04
SWM	Mevalonic acid	Epsin-2	0.474	0.05
SWM	Unknown	HAUS augmin-like complex subunit 3	0.474	0.04
SWM	Unknown	RNA exonuclease 5 short isoform (Fragment)	0.475	0.04
SWM	2-Methyl-3-hydroxybutyric acid	Zfp217 protein (Fragment)	0.476	0.02
SWM	D-Lactaldehyde	Integrator complex subunit 2 (Int2)	0.477	0.05
SWM	Unknown	DNA repair protein XRCC3 (X-ray repair cross-complementing protein 3)	0.477	0.04
SWM	Unknown	Zfp217 protein (Fragment)	0.478	0.01
SWM	Unknown	RNA exonuclease 5 short isoform (Fragment)	0.478	0.01
SWM	Unknown	Attractin	0.479	0
SWM	Unknown	DNA repair protein XRCC3 (X-ray repair cross-complementing protein 3)	0.48	0.04
SWM	Unknown	DNA repair protein XRCC3 (X-ray repair cross-complementing protein 3)	0.48	0.05
SWM	2,6-Diamino-4-hydroxy-5-N-methylformamidopyrimidine	HAUS augmin-like complex subunit 3	0.481	0.01
SWM	Unknown	Tetratricopeptide repeat protein 8 (Fragment)	0.481	0.02
SWM	6-Dimethylaminopurine	tRNA wybutosine-synthesizing protein 5 (EC 1.14.11.42) (tRNA(Phe) (7-(3-amino-3-carboxypropyl)wyosine(37)-C(2))-hydroxylase)	0.482	0.04
SWM	Succinylacetoacetate	unknown	0.482	0.04
SWM	Unknown	Transforming acidic coiled-coil-containing protein 3 (ARNT-interacting protein)	0.482	0.01
SWM	Unknown	Zfp217 protein (Fragment)	0.483	0.03
SWM	L-Acetylcarnitine	RNA exonuclease 5 short isoform (Fragment)	0.484	0.01
SWM	Unknown	unknown	0.484	0.01
SWM	Unknown	HAUS augmin-like complex subunit 3	0.484	0.04
SWM	Unknown	unknown	0.485	0.04
SWM	Unknown	HAUS augmin-like complex subunit 3	0.485	0.02
SWM	Unknown	PH and SEC7 domain-containing protein 4 (Exchange factor for ADP-ribosylation factor guanine nucleotide factor 6 B) (Exchange factor for ARF6 B) (Pleckstrin homology and SEC7 domain-containing protein 4)	0.486	0.03
SWM	Unknown	Zfp217 protein (Fragment)	0.486	0.04
SWM	Unknown	Transforming acidic coiled-coil-containing protein 3 (ARNT-interacting protein)	0.486	0.01
SWM	Unknown	unknown	0.487	0.03
SWM	Unknown	G1/S-specific cyclin-D2 (Fragment)	0.487	0.02
SWM	4-(2-Aminophenyl)-2,4-dioxobutanoic acid	Zfp217 protein (Fragment)	0.488	0.03
SWM	Tropinone	RNA exonuclease 5 short isoform (Fragment)	0.49	0.03
SWM	Unknown	tRNA wybutosine-synthesizing protein 5 (EC 1.14.11.42) (tRNA(Phe) (7-(3-amino-3-carboxypropyl)wyosine(37)-C(2))-hydroxylase)	0.49	0.04
SWM	Unknown	unknown	0.49	0.01
SWM	4-Hydroxybenzoic acid	Attractin	0.491	0
SWM	Unknown	CD5 antigen-like (Apoptosis inhibitor expressed by macrophages) (mAIM) (Apoptosis inhibitory 6) (SP-alpha)	0.492	0.05
SWM	Unknown	Brain mitochondrial carrier protein 1	0.492	0.05
SWM	Unknown	HAUS augmin-like complex subunit 3	0.493	0.02
SWM	Mevalonic acid	unknown	0.494	0.03
SWM	Mevalonic acid	Zfp217 protein (Fragment)	0.494	0.04
SWM	Unknown	DNA repair protein XRCC3 (X-ray repair cross-complementing protein 3)	0.496	0.05
SWM	Unknown	HAUS augmin-like complex subunit 3	0.496	0.01
SWM	Aminoadipic acid	Agouti-related protein (Fragment)	0.497	0.02
SWM	Imidazol-5-yl-pyruvate	tRNA wybutosine-synthesizing protein 5 (EC 1.14.11.42) (tRNA(Phe) (7-(3-amino-3-carboxypropyl)wyosine(37)-C(2))-hydroxylase)	0.497	0.03
SWM	Tropinone	Palmitoyltransferase ZDHHC2 (EC 2.3.1.225) (Zinc finger DHHC domain-containing protein 2) (DHHC-2)	0.497	0.02
SWM	Unknown	Zfp217 protein (Fragment)	0.497	0.02
SWM	Unknown	Integrin alpha 9 protein	0.497	0.05
SWM	Unknown	Brain mitochondrial carrier protein 1	0.497	0.04
SWM	2-Methyl-3-hydroxybutyric acid	HAUS augmin-like complex subunit 3	0.498	0.03
SWM	Unknown	unknown	0.498	0.02
SWM	2-Hydroxyadipic acid	Palmitoyltransferase ZDHHC2 (EC 2.3.1.225) (Zinc finger DHHC domain-containing protein 2) (DHHC-2)	0.499	0.04
SWM	Unknown	Agouti-related protein (Fragment)	0.499	0.01
SWM	Unknown	Zfp217 protein (Fragment)	0.5	0.01
SWM	Unknown	RNA exonuclease 5 short isoform (Fragment)	0.5	0.01
SWM	2-Octenedioic acid	B9 domain-containing protein 1 (Fragment)	0.501	0.04
SWM	Tyramine	DNA repair protein XRCC3 (X-ray repair cross-complementing protein 3)	0.501	0.04
SWM	Unknown	unknown	0.501	0.05
SWM	Unknown	Palmitoyltransferase ZDHHC2 (EC 2.3.1.225) (Zinc finger DHHC domain-containing protein 2) (DHHC-2)	0.501	0.02
SWM	Imidazol-5-yl-pyruvate	PH and SEC7 domain-containing protein 4 (Exchange factor for ADP-ribosylation factor guanine nucleotide factor 6 B) (Exchange factor for ARF6 B) (Pleckstrin homology and SEC7 domain-containing protein 4)	0.503	0.04
SWM	Unknown	unknown	0.503	0.05
SWM	Unknown	Eukaryotic initiation factor 4A-II	0.503	0.05
SWM	Unknown	Epsin-2	0.504	0.05
SWM	Unknown	tRNA wybutosine-synthesizing protein 5 (EC 1.14.11.42) (tRNA(Phe) (7-(3-amino-3-carboxypropyl)wyosine(37)-C(2))-hydroxylase)	0.505	0.01
SWM	Unknown	Epsin-2	0.505	0.04
SWM	Unknown	Transforming acidic coiled-coil-containing protein 3 (ARNT-interacting protein)	0.505	0
SWM	Unknown	Ankyrin repeat domain-containing protein 37	0.505	0.03
SWM	3-Hexanone	Zfp217 protein (Fragment)	0.506	0
SWM	Mevalonic acid	HAUS augmin-like complex subunit 3	0.506	0.05
SWM	Unknown	Transforming acidic coiled-coil-containing protein 3 (ARNT-interacting protein)	0.506	0
SWM	Unknown	HAUS augmin-like complex subunit 3	0.506	0.04
SWM	Unknown	HAUS augmin-like complex subunit 3	0.506	0.02
SWM	Unknown	RNA exonuclease 5 short isoform (Fragment)	0.506	0.03
SWM	Futalosine	HAUS augmin-like complex subunit 3	0.507	0.02
SWM	Succinylacetoacetate	Palmitoyltransferase ZDHHC2 (EC 2.3.1.225) (Zinc finger DHHC domain-containing protein 2) (DHHC-2)	0.507	0.05
SWM	Unknown	Zfp217 protein (Fragment)	0.507	0.02
SWM	2-Octenedioic acid	unknown	0.508	0.03
SWM	4-Oxo-4-(3-pyridyl)-butanamide	Agouti-related protein (Fragment)	0.508	0.01
SWM	Unknown	40S ribosomal protein S27	0.508	0.05
SWM	Unknown	Ankyrin repeat domain-containing protein 37	0.509	0.03
SWM	Isopropanol	HAUS augmin-like complex subunit 3	0.51	0.02
SWM	Unknown	Adropin (Energy homeostasis-associated protein)	0.51	0.05
SWM	D-Lactaldehyde	Brain mitochondrial carrier protein 1	0.511	0
SWM	Unknown	60S ribosomal protein L38	0.511	0.05
SWM	Unknown	GREB1-like protein	0.511	0.05
SWM	Unknown	unknown	0.511	0.04
SWM	Unknown	unknown	0.512	0.04
SWM	2-Hydroxyadipic acid	Ankyrin repeat domain-containing protein 37	0.513	0.04
SWM	2-Hydroxyadipic acid	G1/S-specific cyclin-D2 (Fragment)	0.514	0
SWM	Unknown	Testis development-related protein	0.514	0.03
SWM	Unknown	Ankyrin repeat domain-containing protein 37	0.514	0.04
SWM	Unknown	Brain mitochondrial carrier protein 1	0.514	0
SWM	2-Indolecarboxylic acid	HAUS augmin-like complex subunit 3	0.515	0.03
SWM	Unknown	unknown	0.515	0.05
SWM	Unknown	Brain mitochondrial carrier protein 1	0.515	0.01
SWM	Unknown	unknown	0.516	0.01
SWM	Unknown	DNA repair protein XRCC3 (X-ray repair cross-complementing protein 3)	0.516	0.02
SWM	Unknown	unknown	0.516	0.04
SWM	Unknown	Zfp217 protein (Fragment)	0.516	0.02
SWM	Unknown	DNA repair protein XRCC3 (X-ray repair cross-complementing protein 3)	0.517	0.05
SWM	Unknown	Zfp217 protein (Fragment)	0.517	0
SWM	Unknown	Spermatogenesis-associated protein 5 (Spermatogenesis-associated factor protein)	0.517	0.04
SWM	Unknown	Transforming acidic coiled-coil-containing protein 3 (ARNT-interacting protein)	0.517	0
SWM	Unknown	Integrin alpha 9 protein	0.517	0.04
SWM	Unknown	Tetratricopeptide repeat protein 8 (Fragment)	0.518	0.02
SWM	Unknown	unknown	0.518	0
SWM	Unknown	unknown	0.519	0
SWM	Unknown	HAUS augmin-like complex subunit 3	0.519	0.03
SWM	Unknown	unknown	0.519	0.04
SWM	Micropine	Agouti-related protein (Fragment)	0.52	0.01
SWM	Unknown	Ankyrin repeat domain-containing protein 37	0.52	0.04
SWM	2-Methyl-3-hydroxybutyric acid	unknown	0.521	0
SWM	Unknown	tRNA wybutosine-synthesizing protein 5 (EC 1.14.11.42) (tRNA(Phe) (7-(3-amino-3-carboxypropyl)wyosine(37)-C(2))-hydroxylase)	0.521	0.02
SWM	2-Hydroxyadipic acid	Agouti-related protein (Fragment)	0.522	0.03
SWM	Ecgonine methyl ester	Serpin A12 (Visceral adipose tissue-derived serine protease inhibitor) (Vaspin) (Visceral adipose-specific serpin)	0.522	0.05
SWM	Homoanserine	unknown	0.522	0.04
SWM	Unknown	Tetratricopeptide repeat protein 8 (Fragment)	0.522	0.01
SWM	Unknown	unknown	0.523	0.01
SWM	Unknown	Tetratricopeptide repeat protein 8 (Fragment)	0.523	0.01
SWM	Unknown	PH and SEC7 domain-containing protein 4 (Exchange factor for ADP-ribosylation factor guanine nucleotide factor 6 B) (Exchange factor for ARF6 B) (Pleckstrin homology and SEC7 domain-containing protein 4)	0.523	0.02
SWM	6-Dimethylaminopurine	Attractin	0.524	0
SWM	Micropine	unknown	0.524	0.05
SWM	Unknown	Tetratricopeptide repeat protein 8 (Fragment)	0.524	0.01
SWM	Unknown	Testis development-related protein	0.524	0.04
SWM	2-Methyl-3-hydroxybutyric acid	Oxygen-dependent coproporphyrinogen-III oxidase, mitochondrial (COX) (Coprogen oxidase) (Coproporphyrinogenase) (EC 1.3.3.3)	0.525	0.05
SWM	2,6-Diamino-4-hydroxy-5-N-methylformamidopyrimidine	unknown	0.525	0.05
SWM	Futalosine	T-box transcription factor TBX3 (T-box protein 3)	0.525	0.04
SWM	Simvastatin	Nuclear export mediator factor Nemf (Serologically defined colon cancer antigen 1 homolog)	0.525	0.02
SWM	Unknown	Zfp217 protein (Fragment)	0.525	0.02
SWM	Unknown	Integrator complex subunit 2 (Int2)	0.526	0.02
SWM	Unknown	Testis development-related protein	0.526	0.02
SWM	Aminoadipic acid	HAUS augmin-like complex subunit 3	0.527	0.02
SWM	Unknown	Transcription factor MafB (Maf-B) (Kreisler) (Segmentation protein Kr) (Transcription factor Maf-1) (V-maf musculoaponeurotic fibrosarcoma oncogene homolog B)	0.527	0.04
SWM	Unknown	unknown	0.527	0.04
SWM	2-Methyl-3-hydroxybutyric acid	unknown	0.528	0.02
SWM	Unknown	60S ribosomal protein L31	0.528	0.05
SWM	Unknown	DNA repair protein XRCC3 (X-ray repair cross-complementing protein 3)	0.528	0.05
SWM	Succinylacetoacetate	Ankyrin repeat domain-containing protein 37	0.529	0
SWM	Unknown	unknown	0.529	0.03
SWM	Unknown	HAUS augmin-like complex subunit 3	0.529	0.03
SWM	Unknown	HAUS augmin-like complex subunit 3	0.529	0.01
SWM	D-Lactaldehyde	Transforming acidic coiled-coil-containing protein 3 (ARNT-interacting protein)	0.53	0
SWM	Unknown	Spermatogenesis-associated protein 5 (Spermatogenesis-associated factor protein)	0.53	0.03
SWM	Unknown	HAUS augmin-like complex subunit 3	0.53	0.02
SWM	Unknown	tRNA wybutosine-synthesizing protein 5 (EC 1.14.11.42) (tRNA(Phe) (7-(3-amino-3-carboxypropyl)wyosine(37)-C(2))-hydroxylase)	0.531	0.01
SWM	Unknown	unknown	0.531	0
SWM	Unknown	Transcription factor MafB (Maf-B) (Kreisler) (Segmentation protein Kr) (Transcription factor Maf-1) (V-maf musculoaponeurotic fibrosarcoma oncogene homolog B)	0.531	0.05
SWM	Unknown	Ankyrin repeat domain-containing protein 37	0.531	0.03
SWM	Lipoamide	Liver-expressed antimicrobial peptide 2 (LEAP-2)	0.532	0.05
SWM	Unknown	HAUS augmin-like complex subunit 3	0.532	0.01
SWM	Unknown	Palmitoyltransferase ZDHHC2 (EC 2.3.1.225) (Zinc finger DHHC domain-containing protein 2) (DHHC-2)	0.532	0.01
SWM	4-Hydroxybenzoic acid	Spermatogenesis-associated protein 5 (Spermatogenesis-associated factor protein)	0.533	0.04
SWM	Tyramine	HAUS augmin-like complex subunit 3	0.533	0.03
SWM	Unknown	Tetratricopeptide repeat protein 8 (Fragment)	0.533	0.01
SWM	Unknown	Spermatogenesis-associated protein 5 (Spermatogenesis-associated factor protein)	0.533	0.03
SWM	Unknown	HAUS augmin-like complex subunit 3	0.533	0.04
SWM	2-Hydroxyadipic acid	Attractin	0.534	0
SWM	Unknown	HAUS augmin-like complex subunit 3	0.534	0.03
SWM	Unknown	HAUS augmin-like complex subunit 3	0.534	0.01
SWM	3-Hexanone	unknown	0.535	0.01
SWM	Mevalonic acid	PH and SEC7 domain-containing protein 4 (Exchange factor for ADP-ribosylation factor guanine nucleotide factor 6 B) (Exchange factor for ARF6 B) (Pleckstrin homology and SEC7 domain-containing protein 4)	0.535	0.04
SWM	Micropine	HAUS augmin-like complex subunit 3	0.535	0
SWM	Unknown	RNA exonuclease 5 short isoform (Fragment)	0.535	0
SWM	Unknown	Brain mitochondrial carrier protein 1	0.535	0
SWM	N-butanoyl-lhomoserine lactone	C-type lectin domain family 4 member G	0.536	0.03
SWM	Unknown	PH and SEC7 domain-containing protein 4 (Exchange factor for ADP-ribosylation factor guanine nucleotide factor 6 B) (Exchange factor for ARF6 B) (Pleckstrin homology and SEC7 domain-containing protein 4)	0.536	0.03
SWM	Unknown	unknown	0.537	0.04
SWM	Unknown	unknown	0.537	0.05
SWM	1-Pyrroline-5-carboxylic acid	HAUS augmin-like complex subunit 3	0.538	0
SWM	Tyramine	unknown	0.538	0.05
SWM	Unknown	unknown	0.538	0.02
SWM	Unknown	unknown	0.538	0.04
SWM	Unknown	Zfp217 protein (Fragment)	0.538	0.01
SWM	Unknown	Spermatogenesis-associated protein 5 (Spermatogenesis-associated factor protein)	0.538	0.04
SWM	Unknown	Transforming acidic coiled-coil-containing protein 3 (ARNT-interacting protein)	0.538	0
SWM	Unknown	unknown	0.538	0.02
SWM	Homoanserine	Ankyrin repeat domain-containing protein 37	0.539	0
SWM	Unknown	NADH dehydrogenase [ubiquinone] iron-sulfur protein 8, mitochondrial (EC 1.6.5.3) (EC 1.6.99.3) (Complex I-23kD) (CI-23kD) (NADH-ubiquinone oxidoreductase 23 kDa subunit)	0.539	0.05
SWM	Unknown	HAUS augmin-like complex subunit 3	0.539	0.02
SWM	Unknown	unknown	0.54	0.04
SWM	Unknown	Zfp217 protein (Fragment)	0.54	0.05
SWM	Unknown	unknown	0.541	0.02
SWM	Unknown	GDP-L-fucose synthase (EC 1.1.1.271) (GDP-4-keto-6-deoxy-D-mannose-3,5-epimerase-4-reductase) (Protein FX) (Red cell NADP(H)-binding protein) (Transplantation antigen P35B) (Tum-P35B antigen)	0.541	0.04
SWM	Unknown	G1/S-specific cyclin-D2 (Fragment)	0.541	0.04
SWM	Unknown	Palmitoyltransferase ZDHHC2 (EC 2.3.1.225) (Zinc finger DHHC domain-containing protein 2) (DHHC-2)	0.541	0.05
SWM	2-Hydroxyadipic acid	RNA exonuclease 5 short isoform (Fragment)	0.542	0
SWM	2-Methyl-3-hydroxybutyric acid	60S ribosomal protein L31	0.542	0.05
SWM	4-Hydroxybenzoic acid	Ankyrin repeat domain-containing protein 37	0.542	0.02
SWM	D-Lactaldehyde	Attractin	0.542	0.01
SWM	Tropinone	unknown	0.542	0.05
SWM	Unknown	unknown	0.542	0.05
SWM	Unknown	unknown	0.542	0.03
SWM	Unknown	Zfp217 protein (Fragment)	0.542	0.01
SWM	Unknown	unknown	0.542	0.05
SWM	2-Methyl-3-hydroxybutyric acid	unknown	0.543	0.02
SWM	Erucic acid	Serpin A12 (Visceral adipose tissue-derived serine protease inhibitor) (Vaspin) (Visceral adipose-specific serpin)	0.543	0.04
SWM	Mevalonic acid	G1/S-specific cyclin-D2 (Fragment)	0.543	0.01
SWM	Unknown	unknown	0.543	0.04
SWM	Unknown	unknown	0.543	0.05
SWM	Unknown	Histone acetyltransferase KAT2B (EC 2.3.1.48) (Histone acetyltransferase PCAF) (Histone acetylase PCAF) (Lysine acetyltransferase 2B) (P300/CBP-associated factor) (P/CAF)	0.543	0.01
SWM	Unknown	HAUS augmin-like complex subunit 3	0.543	0.03
SWM	2,6-Diamino-4-hydroxy-5-N-methylformamidopyrimidine	Vesicle-associated membrane protein 8	0.544	0.04
SWM	Unknown	unknown	0.544	0.04
SWM	Unknown	Proteasome subunit beta type-1 (EC 3.4.25.1) (Macropain subunit C5) (Multicatalytic endopeptidase complex subunit C5) (Proteasome component C5) (Proteasome gamma chain)	0.544	0.05
SWM	Unknown	HAUS augmin-like complex subunit 3	0.544	0
SWM	Unknown	RNA exonuclease 5 short isoform (Fragment)	0.544	0.01
SWM	Mevalonic acid	DNA repair protein XRCC3 (X-ray repair cross-complementing protein 3)	0.545	0.01
SWM	Tropinone	T-box transcription factor TBX3 (T-box protein 3)	0.545	0.03
SWM	Unknown	T-box transcription factor TBX3 (T-box protein 3)	0.545	0.04
SWM	Unknown	T-box transcription factor TBX3 (T-box protein 3)	0.545	0.04
SWM	Unknown	HAUS augmin-like complex subunit 3	0.545	0.03
SWM	Unknown	unknown	0.546	0.01
SWM	Unknown	Epsin-2	0.546	0.04
SWM	Unknown	T-box transcription factor TBX3 (T-box protein 3)	0.546	0.03
SWM	Unknown	Zinc-alpha-2-glycoprotein (Zn-alpha-2-GP) (Zn-alpha-2-glycoprotein)	0.546	0.05
SWM	Unknown	unknown	0.546	0.03
SWM	Unknown	Small nuclear ribonucleoprotein Sm D2 (Sm-D2) (snRNP core protein D2)	0.546	0.05
SWM	Unknown	RNA exonuclease 5 short isoform (Fragment)	0.546	0.01
SWM	Unknown	Ankyrin repeat domain-containing protein 37	0.546	0.02
SWM	L-Acetylcarnitine	unknown	0.547	0.04
SWM	Mevalonic acid	Integrator complex subunit 2 (Int2)	0.547	0
SWM	Tropinone	Ankyrin repeat domain-containing protein 37	0.547	0.03
SWM	15(S)-Hydroxyeicosatrienoic acid	HAUS augmin-like complex subunit 3	0.548	0.03
SWM	Succinylacetoacetate	Spermatogenesis-associated protein 5 (Spermatogenesis-associated factor protein)	0.548	0.04
SWM	Unknown	unknown	0.548	0.04
SWM	Unknown	Integrator complex subunit 2 (Int2)	0.548	0.03
SWM	Unknown	Retinol-binding protein 1 (Cellular retinol-binding protein) (CRBP) (Cellular retinol-binding protein I) (CRBP-I) (mCRBPI)	0.548	0.04
SWM	Erucic acid	unknown	0.549	0.04
SWM	Unknown	unknown	0.549	0.04
SWM	2-Octenedioic acid	unknown	0.55	0.02
SWM	Unknown	unknown	0.55	0.05
SWM	Unknown	unknown	0.55	0.01
SWM	Unknown	unknown	0.55	0.04
SWM	Unknown	Zfp217 protein (Fragment)	0.55	0.01
SWM	Unknown	Spermatogenesis-associated protein 5 (Spermatogenesis-associated factor protein)	0.55	0.04
SWM	Unknown	unknown	0.55	0.05
SWM	2-Methyl-3-hydroxybutyric acid	Proteasome subunit beta type-1 (EC 3.4.25.1) (Macropain subunit C5) (Multicatalytic endopeptidase complex subunit C5) (Proteasome component C5) (Proteasome gamma chain)	0.551	0.04
SWM	Tyramine	RNA exonuclease 5 short isoform (Fragment)	0.551	0
SWM	Unknown	Spermatogenesis-associated protein 5 (Spermatogenesis-associated factor protein)	0.551	0.04
SWM	Tyramine	unknown	0.552	0.03
SWM	Unknown	unknown	0.552	0.03
SWM	Unknown	unknown	0.552	0.05
SWM	Unknown	unknown	0.552	0.05
SWM	Unknown	PH and SEC7 domain-containing protein 4 (Exchange factor for ADP-ribosylation factor guanine nucleotide factor 6 B) (Exchange factor for ARF6 B) (Pleckstrin homology and SEC7 domain-containing protein 4)	0.552	0.02
SWM	Diketospirilloxanthin/ 2,2'-Diketospirilloxanthin	Lysozyme C-2 (EC 3.2.1.17) (1,4-beta-N-acetylmuramidase C) (Lysozyme C type M)	0.553	0.05
SWM	2-Hydroxyadipic acid	unknown	0.553	0.04
SWM	2-Methyl-3-hydroxybutyric acid	Eukaryotic initiation factor 4A-II	0.553	0.01
SWM	6-Dimethylaminopurine	unknown	0.553	0.04
SWM	Unknown	T-box transcription factor TBX3 (T-box protein 3)	0.553	0.03
SWM	Unknown	HAUS augmin-like complex subunit 3	0.553	0.01
SWM	2,6-Diamino-4-hydroxy-5-N-methylformamidopyrimidine	Epsin-2	0.554	0.02
SWM	2,6-Diamino-4-hydroxy-5-N-methylformamidopyrimidine	T-box transcription factor TBX3 (T-box protein 3)	0.554	0.01
SWM	Tyramine	Integrin alpha 9 protein	0.554	0.01
SWM	Unknown	Secreted phosphoprotein 24 (Fragment)	0.554	0.05
SWM	Unknown	T-box transcription factor TBX3 (T-box protein 3)	0.554	0.04
SWM	Unknown	Ankyrin repeat domain-containing protein 37	0.554	0.01
SWM	2,6-Diamino-4-hydroxy-5-N-methylformamidopyrimidine	unknown	0.555	0.04
SWM	6-Dimethylaminopurine	Transcription factor MafB (Maf-B) (Kreisler) (Segmentation protein Kr) (Transcription factor Maf-1) (V-maf musculoaponeurotic fibrosarcoma oncogene homolog B)	0.555	0.02
SWM	Isopropanol	unknown	0.555	0.05
SWM	Unknown	unknown	0.555	0
SWM	Unknown	unknown	0.555	0.05
SWM	Unknown	Attractin	0.555	0
SWM	Unknown	Transforming acidic coiled-coil-containing protein 3 (ARNT-interacting protein)	0.555	0
SWM	Unknown	HAUS augmin-like complex subunit 3	0.555	0.03
SWM	N-butanoyl-lhomoserine lactone	HAUS augmin-like complex subunit 3	0.556	0.04
SWM	2,6-Diamino-4-hydroxy-5-N-methylformamidopyrimidine	DNA repair protein XRCC3 (X-ray repair cross-complementing protein 3)	0.556	0
SWM	Unknown	Epsin-2	0.556	0.05
SWM	Unknown	Transcription factor MafB (Maf-B) (Kreisler) (Segmentation protein Kr) (Transcription factor Maf-1) (V-maf musculoaponeurotic fibrosarcoma oncogene homolog B)	0.556	0.01
SWM	Lipoamide	unknown	0.557	0.04
SWM	Unknown	Tetratricopeptide repeat protein 8 (Fragment)	0.557	0
SWM	Unknown	Proteasome subunit beta type-1 (EC 3.4.25.1) (Macropain subunit C5) (Multicatalytic endopeptidase complex subunit C5) (Proteasome component C5) (Proteasome gamma chain)	0.557	0.03
SWM	2-Hydroxyadipic acid	Tetratricopeptide repeat protein 8 (Fragment)	0.558	0
SWM	2-Octenedioic acid	40S ribosomal protein S10	0.558	0.05
SWM	4-Hydroxybenzoic acid	Transcription factor MafB (Maf-B) (Kreisler) (Segmentation protein Kr) (Transcription factor Maf-1) (V-maf musculoaponeurotic fibrosarcoma oncogene homolog B)	0.558	0.04
SWM	Isopropanol	T-box transcription factor TBX3 (T-box protein 3)	0.558	0.03
SWM	Unknown	Epsin-2	0.558	0.04
SWM	Mevalonic acid	Palmitoyltransferase ZDHHC2 (EC 2.3.1.225) (Zinc finger DHHC domain-containing protein 2) (DHHC-2)	0.559	0.02
SWM	Unknown	unknown	0.559	0.05
SWM	Unknown	unknown	0.559	0.01
SWM	Unknown	unknown	0.559	0.03
SWM	3-Hexanone	unknown	0.56	0.05
SWM	Unknown	unknown	0.56	0.03
SWM	Unknown	Serpin A12 (Visceral adipose tissue-derived serine protease inhibitor) (Vaspin) (Visceral adipose-specific serpin)	0.56	0.05
SWM	2-Hydroxyadipic acid	unknown	0.561	0.04
SWM	2-Octenedioic acid	unknown	0.561	0.05
SWM	Unknown	DNA repair protein XRCC3 (X-ray repair cross-complementing protein 3)	0.561	0.02
SWM	Unknown	unknown	0.561	0.03
SWM	Unknown	G1/S-specific cyclin-D2 (Fragment)	0.561	0
SWM	Unknown	tRNA wybutosine-synthesizing protein 5 (EC 1.14.11.42) (tRNA(Phe) (7-(3-amino-3-carboxypropyl)wyosine(37)-C(2))-hydroxylase)	0.562	0.01
SWM	Unknown	DNA repair protein XRCC3 (X-ray repair cross-complementing protein 3)	0.562	0.04
SWM	Unknown	PH and SEC7 domain-containing protein 4 (Exchange factor for ADP-ribosylation factor guanine nucleotide factor 6 B) (Exchange factor for ARF6 B) (Pleckstrin homology and SEC7 domain-containing protein 4)	0.562	0.02
SWM	Unknown	Zfp217 protein (Fragment)	0.562	0
SWM	4-Hydroxybenzoic acid	Zfp217 protein (Fragment)	0.563	0.04
SWM	Mevalonic acid	Testis development-related protein	0.563	0.01
SWM	Tropinone	unknown	0.563	0.02
SWM	Unknown	C-type lectin domain family 4 member G	0.563	0.05
SWM	Unknown	Testis development-related protein	0.563	0.03
SWM	Unknown	Ankyrin repeat domain-containing protein 37	0.563	0
SWM	1-Pyrroline-5-carboxylic acid	RNA exonuclease 5 short isoform (Fragment)	0.564	0.01
SWM	2-Methyl-3-hydroxybutyric acid	Phospholipid phosphatase 3 (EC 3.1.3.4) (Lipid phosphate phosphohydrolase 3) (PAP2-beta) (Phosphatidate phosphohydrolase type 2b) (Phosphatidic acid phosphatase 2b) (PAP-2b) (PAP2b)	0.564	0.05
SWM	4-(2-Aminophenyl)-2,4-dioxobutanoic acid	unknown	0.564	0.04
SWM	5-Hydroxyindoleacetic acid	HAUS augmin-like complex subunit 3	0.564	0
SWM	D-Lactaldehyde	unknown	0.564	0.02
SWM	Unknown	unknown	0.564	0.04
SWM	Unknown	unknown	0.564	0.05
SWM	Unknown	unknown	0.564	0.02
SWM	Unknown	HAUS augmin-like complex subunit 3	0.564	0
SWM	Unknown	HAUS augmin-like complex subunit 3	0.564	0.02
SWM	Unknown	unknown	0.564	0.02
SWM	Unknown	Small nuclear ribonucleoprotein Sm D2 (Sm-D2) (snRNP core protein D2)	0.564	0.05
SWM	Unknown	Mannose-binding protein A (MBP-A) (Mannan-binding protein) (Ra-reactive factor polysaccharide-binding component p28B) (RaRF p28B)	0.565	0.03
SWM	Unknown	unknown	0.565	0.03
SWM	Unknown	unknown	0.565	0.05
SWM	Unknown	NADH dehydrogenase [ubiquinone] iron-sulfur protein 8, mitochondrial (EC 1.6.5.3) (EC 1.6.99.3) (Complex I-23kD) (CI-23kD) (NADH-ubiquinone oxidoreductase 23 kDa subunit)	0.565	0.05
SWM	Unknown	Spermatogenesis-associated protein 5 (Spermatogenesis-associated factor protein)	0.565	0.01
SWM	Unknown	Iodothyronine deiodinase	0.565	0.05
SWM	Unknown	HAUS augmin-like complex subunit 3	0.565	0.03
SWM	Unknown	RNA exonuclease 5 short isoform (Fragment)	0.565	0.01
SWM	1-Pyrroline-5-carboxylic acid	T-box transcription factor TBX3 (T-box protein 3)	0.566	0.04
SWM	2-Methyl-3-hydroxybutyric acid	60S ribosomal protein L31	0.566	0.02
SWM	Lipoamide	HAUS augmin-like complex subunit 3	0.566	0.04
SWM	Unknown	60S ribosomal protein L31	0.566	0.05
SWM	Unknown	Oxygen-dependent coproporphyrinogen-III oxidase, mitochondrial (COX) (Coprogen oxidase) (Coproporphyrinogenase) (EC 1.3.3.3)	0.566	0.05
SWM	Erucic acid	Proteasome subunit beta type-1 (EC 3.4.25.1) (Macropain subunit C5) (Multicatalytic endopeptidase complex subunit C5) (Proteasome component C5) (Proteasome gamma chain)	0.567	0.04
SWM	Unknown	Proteasome subunit alpha type-7 (EC 3.4.25.1) (Proteasome subunit RC6-1)	0.567	0.05
SWM	Unknown	G1/S-specific cyclin-D2 (Fragment)	0.567	0.02
SWM	Unknown	Palmitoyltransferase ZDHHC2 (EC 2.3.1.225) (Zinc finger DHHC domain-containing protein 2) (DHHC-2)	0.567	0.02
SWM	1-Pyrroline-5-carboxylic acid	unknown	0.568	0.02
SWM	2-Hydroxyadipic acid	unknown	0.568	0.05
SWM	4-(2-Aminophenyl)-2,4-dioxobutanoic acid	Proteasome subunit beta type-1 (EC 3.4.25.1) (Macropain subunit C5) (Multicatalytic endopeptidase complex subunit C5) (Proteasome component C5) (Proteasome gamma chain)	0.568	0.05
SWM	alpha-Tocopherol acetate	Beta-crystallin B3 (Fragment)	0.568	0.04
SWM	Unknown	CD5 antigen-like (Apoptosis inhibitor expressed by macrophages) (mAIM) (Apoptosis inhibitory 6) (SP-alpha)	0.568	0.05
SWM	2-Methyl-3-hydroxybutyric acid	unknown	0.569	0.04
SWM	D-Lactaldehyde	Ankyrin repeat domain-containing protein 37	0.569	0.01
SWM	Unknown	Sr104 protein (Fragment)	0.569	0.05
SWM	Unknown	Spermatogenesis-associated protein 5 (Spermatogenesis-associated factor protein)	0.569	0.05
SWM	Unknown	Major urinary protein 15	0.569	0.02
SWM	Unknown	T-box transcription factor TBX3 (T-box protein 3)	0.569	0.05
SWM	Unknown	T-box transcription factor TBX3 (T-box protein 3)	0.569	0.03
SWM	Unknown	T-box transcription factor TBX3 (T-box protein 3)	0.569	0.01
SWM	Unknown	Cytochrome c oxidase subunit 7A2, mitochondrial (Cytochrome c oxidase subunit VIIa-liver/heart) (Cytochrome c oxidase subunit VIIa-L)	0.569	0.03
SWM	4-(2-Aminophenyl)-2,4-dioxobutanoic acid	unknown	0.57	0.05
SWM	6-Dimethylaminopurine	Integrator complex subunit 2 (Int2)	0.57	0.02
SWM	Homoanserine	GREB1-like protein	0.57	0
SWM	L-Acetylcarnitine	Transcription factor MafB (Maf-B) (Kreisler) (Segmentation protein Kr) (Transcription factor Maf-1) (V-maf musculoaponeurotic fibrosarcoma oncogene homolog B)	0.57	0.03
SWM	Unknown	unknown	0.57	0.05
SWM	Unknown	unknown	0.57	0.04
SWM	Unknown	unknown	0.57	0.03
SWM	Unknown	unknown	0.57	0.05
SWM	Unknown	Epsin-2	0.57	0.02
SWM	1-Pyrroline-5-carboxylic acid	unknown	0.571	0.02
SWM	Unknown	DNA repair protein XRCC3 (X-ray repair cross-complementing protein 3)	0.571	0.02
SWM	Unknown	unknown	0.571	0.03
SWM	Unknown	T-box transcription factor TBX3 (T-box protein 3)	0.571	0.03
SWM	Unknown	Brain mitochondrial carrier protein 1	0.571	0.01
SWM	2-Octenedioic acid	Ankyrin repeat domain-containing protein 37	0.572	0.03
SWM	Unknown	unknown	0.572	0
SWM	Unknown	HAUS augmin-like complex subunit 3	0.572	0.03
SWM	3-Hexanone	unknown	0.573	0.03
SWM	Unknown	unknown	0.573	0.03
SWM	Unknown	Proteasome subunit beta type-1 (EC 3.4.25.1) (Macropain subunit C5) (Multicatalytic endopeptidase complex subunit C5) (Proteasome component C5) (Proteasome gamma chain)	0.573	0.05
SWM	Unknown	Ankyrin repeat domain-containing protein 37	0.573	0
SWM	2-Indolecarboxylic acid	T-box transcription factor TBX3 (T-box protein 3)	0.574	0
SWM	Futalosine	RNA exonuclease 5 short isoform (Fragment)	0.574	0
SWM	Micropine	Vesicle-associated membrane protein 8	0.574	0.05
SWM	Unknown	40S ribosomal protein S15	0.574	0.03
SWM	Unknown	unknown	0.574	0.05
SWM	Unknown	GREB1-like protein	0.574	0.01
SWM	Unknown	Integrin alpha 9 protein	0.574	0.03
SWM	6-Dimethylaminopurine	PH and SEC7 domain-containing protein 4 (Exchange factor for ADP-ribosylation factor guanine nucleotide factor 6 B) (Exchange factor for ARF6 B) (Pleckstrin homology and SEC7 domain-containing protein 4)	0.575	0.02
SWM	Unknown	unknown	0.575	0.05
SWM	Unknown	Proteasome subunit beta type-1 (EC 3.4.25.1) (Macropain subunit C5) (Multicatalytic endopeptidase complex subunit C5) (Proteasome component C5) (Proteasome gamma chain)	0.575	0.04
SWM	Unknown	40S ribosomal protein S17	0.575	0.05
SWM	Unknown	MCG116671	0.576	0.04
SWM	D-Lactaldehyde	Testis development-related protein	0.577	0.01
SWM	Mevalonic acid	RNA exonuclease 5 short isoform (Fragment)	0.577	0
SWM	Unknown	unknown	0.577	0.04
SWM	Unknown	T-box transcription factor TBX3 (T-box protein 3)	0.577	0.01
SWM	Unknown	unknown	0.577	0.02
SWM	Unknown	unknown	0.577	0.05
SWM	3-Carboxy-cis,cis-muconate	DNA repair protein XRCC3 (X-ray repair cross-complementing protein 3)	0.578	0.01
SWM	Futalosine	3-hydroxyacyl-CoA dehydrogenase type-2 (EC 1.1.1.35) (17-beta-hydroxysteroid dehydrogenase 10) (17-beta-HSD 10) (EC 1.1.1.51) (3-hydroxy-2-methylbutyryl-CoA dehydrogenase) (EC 1.1.1.178) (3-hydroxyacyl-CoA dehydrogenase type II) (Endoplasmic reticulum-associated amyloid beta-peptide-binding protein) (Mitochondrial ribonuclease P protein 2) (Mitochondrial RNase P protein 2) (Type II HADH)	0.578	0.05
SWM	Unknown	unknown	0.578	0.02
SWM	Unknown	Proteasome subunit beta type-6 (EC 3.4.25.1) (Low molecular mass protein 19) (Macropain delta chain) (Multicatalytic endopeptidase complex delta chain) (Proteasome delta chain) (Proteasome subunit Y)	0.578	0.04
SWM	Unknown	Epsin-2	0.578	0
SWM	Unknown	Zfp217 protein (Fragment)	0.578	0.05
SWM	Unknown	40S ribosomal protein S25	0.578	0.05
SWM	Unknown	Brain mitochondrial carrier protein 1	0.578	0
SWM	4-Oxo-4-(3-pyridyl)-butanamide	unknown	0.579	0.01
SWM	Unknown	unknown	0.579	0.05
SWM	4-(2-Aminophenyl)-2,4-dioxobutanoic acid	unknown	0.58	0.05
SWM	4-Oxo-4-(3-pyridyl)-butanamide	HAUS augmin-like complex subunit 3	0.58	0.01
SWM	5-Hydroxyindoleacetic acid	T-box transcription factor TBX3 (T-box protein 3)	0.58	0.02
SWM	Mevalonic acid	Tetratricopeptide repeat protein 8 (Fragment)	0.58	0
SWM	Unknown	Transcription factor MafB (Maf-B) (Kreisler) (Segmentation protein Kr) (Transcription factor Maf-1) (V-maf musculoaponeurotic fibrosarcoma oncogene homolog B)	0.58	0.03
SWM	Mevalonic acid	unknown	0.581	0.01
SWM	Unknown	Transmembrane protein 256	0.581	0.05
SWM	Unknown	Guanylate kinase	0.581	0.04
SWM	Unknown	unknown	0.581	0.03
SWM	N-butanoyl-lhomoserine lactone	unknown	0.582	0.02
SWM	L-Acetylcarnitine	C-type lectin domain family 4 member G	0.582	0.05
SWM	Unknown	Integrator complex subunit 2 (Int2)	0.582	0.01
SWM	Unknown	unknown	0.582	0.04
SWM	Unknown	Eukaryotic translation initiation factor 3 subunit K	0.582	0.05
SWM	Unknown	Fucose mutarotase (Fragment)	0.582	0.05
SWM	L-Acetylcarnitine	Annexin	0.583	0.03
SWM	Unknown	Uncharacterized protein	0.583	0.05
SWM	Unknown	RNA exonuclease 5 short isoform (Fragment)	0.583	0
SWM	L-Acetylcarnitine	40S ribosomal protein S25	0.584	0.03
SWM	Lipoamide	Cytochrome c oxidase subunit 7A2, mitochondrial (Cytochrome c oxidase subunit VIIa-liver/heart) (Cytochrome c oxidase subunit VIIa-L)	0.584	0.05
SWM	Mevalonic acid	Ankyrin repeat domain-containing protein 37	0.584	0.02
SWM	Unknown	unknown	0.584	0.02
SWM	Unknown	Spermatogenesis-associated protein 5 (Spermatogenesis-associated factor protein)	0.584	0.02
SWM	Unknown	HAUS augmin-like complex subunit 3	0.584	0.02
SWM	Unknown	Protein phosphatase 1 regulatory subunit 3B (Hepatic glycogen-targeting protein phosphatase 1 regulatory subunit GL) (Protein phosphatase 1 regulatory subunit 4) (PP1 subunit R4) (Protein phosphatase 1 subunit GL) (PTG)	0.584	0.04
SWM	Unknown	Brain mitochondrial carrier protein 1	0.584	0
SWM	2-Indolecarboxylic acid	unknown	0.585	0
SWM	Isopropanol	Zfp217 protein (Fragment)	0.585	0
SWM	Unknown	DNA repair protein XRCC3 (X-ray repair cross-complementing protein 3)	0.585	0.02
SWM	Unknown	Uncharacterized protein	0.585	0.04
SWM	Unknown	MCG116671	0.586	0.05
SWM	Unknown	Transforming acidic coiled-coil-containing protein 3 (ARNT-interacting protein)	0.586	0
SWM	Unknown	Class E basic helix-loop-helix protein 40	0.586	0.05
SWM	Unknown	Methionine aminopeptidase 1D, mitochondrial (MAP 1D) (MetAP 1D) (EC 3.4.11.18) (Methionyl aminopeptidase type 1D, mitochondrial) (Peptidase M 1D)	0.587	0.02
SWM	Unknown	60S ribosomal protein L32	0.587	0.05
SWM	Unknown	Integrin alpha 9 protein	0.587	0.05
SWM	2,6-Diamino-4-hydroxy-5-N-methylformamidopyrimidine	unknown	0.588	0.01
SWM	Unknown	unknown	0.588	0.03
SWM	Unknown	Mrpl20 protein	0.588	0.05
SWM	Tyramine	unknown	0.589	0.02
SWM	Unknown	ATP synthase subunit gamma	0.589	0.05
SWM	2-Indolecarboxylic acid	Transmembrane protein 256	0.59	0.04
SWM	Ecgonine methyl ester	Proteasome subunit beta type-1 (EC 3.4.25.1) (Macropain subunit C5) (Multicatalytic endopeptidase complex subunit C5) (Proteasome component C5) (Proteasome gamma chain)	0.59	0.05
SWM	Tropinone	C-type lectin domain family 4 member G	0.59	0.03
SWM	Tyramine	Testis development-related protein	0.59	0.01
SWM	Unknown	Major urinary protein 1	0.59	0.04
SWM	Unknown	Major urinary protein 15	0.59	0.05
SWM	Unknown	60S ribosomal protein L32	0.59	0.05
SWM	Unknown	Brain mitochondrial carrier protein 1	0.59	0
SWM	Micropine	unknown	0.591	0
SWM	N-Phenylacetylphenylalanine	unknown	0.591	0.04
SWM	Simvastatin	Centromere protein X	0.591	0.04
SWM	Succinylacetoacetate	G1/S-specific cyclin-D2 (Fragment)	0.591	0
SWM	Unknown	unknown	0.591	0.03
SWM	Unknown	unknown	0.591	0.02
SWM	Unknown	T-box transcription factor TBX3 (T-box protein 3)	0.591	0.01
SWM	Unknown	40S ribosomal protein S16	0.591	0.04
SWM	5-Hydroxyindoleacetic acid	MCG116671	0.592	0.04
SWM	D-Lactaldehyde	Tetratricopeptide repeat protein 8 (Fragment)	0.592	0
SWM	Succinylacetoacetate	unknown	0.592	0
SWM	Unknown	unknown	0.592	0
SWM	Unknown	Cytochrome c oxidase subunit 7A2, mitochondrial (Cytochrome c oxidase subunit VIIa-liver/heart) (Cytochrome c oxidase subunit VIIa-L)	0.592	0.03
SWM	N-butanoyl-lhomoserine lactone	60S ribosomal protein L32	0.593	0.05
SWM	Unknown	DNA repair protein XRCC3 (X-ray repair cross-complementing protein 3)	0.593	0.01
SWM	Unknown	Proteasome subunit beta type-1 (EC 3.4.25.1) (Macropain subunit C5) (Multicatalytic endopeptidase complex subunit C5) (Proteasome component C5) (Proteasome gamma chain)	0.593	0.03
SWM	Unknown	Attractin	0.593	0
SWM	Unknown	unknown	0.593	0.01
SWM	3-Carboxy-cis,cis-muconate	60S ribosomal protein L32	0.594	0.05
SWM	4-Oxo-4-(3-pyridyl)-butanamide	40S ribosomal protein S25	0.594	0.04
SWM	Micropine	ATP synthase subunit gamma	0.594	0.04
SWM	Unknown	unknown	0.594	0.05
SWM	Unknown	unknown	0.594	0.03
SWM	Unknown	Transforming acidic coiled-coil-containing protein 3 (ARNT-interacting protein)	0.594	0
SWM	2-Indolecarboxylic acid	40S ribosomal protein S10	0.595	0.05
SWM	4-Hydroxybenzoic acid	Zfp217 protein (Fragment)	0.595	0
SWM	5-Hydroxyindoleacetic acid	RNA exonuclease 5 short isoform (Fragment)	0.595	0
SWM	Succinylacetoacetate	Histone acetyltransferase KAT2B (EC 2.3.1.48) (Histone acetyltransferase PCAF) (Histone acetylase PCAF) (Lysine acetyltransferase 2B) (P300/CBP-associated factor) (P/CAF)	0.595	0.01
SWM	Unknown	MCG116671	0.595	0.04
SWM	2,6-Diamino-4-hydroxy-5-N-methylformamidopyrimidine	ATP synthase subunit gamma	0.596	0.05
SWM	4-Hydroxybenzoic acid	Acetoacetyl-CoA synthetase (EC 6.2.1.16)	0.596	0.04
SWM	Unknown	unknown	0.596	0.01
SWM	Unknown	Protein RFT1 homolog	0.596	0.03
SWM	Unknown	Sr104 protein (Fragment)	0.596	0.03
SWM	Unknown	T-box transcription factor TBX3 (T-box protein 3)	0.596	0.01
SWM	Unknown	Uncharacterized aarF domain-containing protein kinase 2 (EC 2.7.11.-)	0.596	0.03
SWM	L-Acetylcarnitine	unknown	0.597	0.03
SWM	Succinylacetoacetate	Epsin-2	0.597	0.01
SWM	Unknown	60S ribosomal protein L23a	0.597	0.05
SWM	Unknown	Oxygen-dependent coproporphyrinogen-III oxidase, mitochondrial (COX) (Coprogen oxidase) (Coproporphyrinogenase) (EC 1.3.3.3)	0.597	0.01
SWM	Unknown	60S ribosomal protein L36	0.597	0.05
SWM	Unknown	T-box transcription factor TBX3 (T-box protein 3)	0.597	0.02
SWM	Unknown	3-hydroxyacyl-CoA dehydrogenase type-2 (EC 1.1.1.35) (17-beta-hydroxysteroid dehydrogenase 10) (17-beta-HSD 10) (EC 1.1.1.51) (3-hydroxy-2-methylbutyryl-CoA dehydrogenase) (EC 1.1.1.178) (3-hydroxyacyl-CoA dehydrogenase type II) (Endoplasmic reticulum-associated amyloid beta-peptide-binding protein) (Mitochondrial ribonuclease P protein 2) (Mitochondrial RNase P protein 2) (Type II HADH)	0.597	0.05
SWM	4-Hydroxybenzoic acid	Spermatogenesis-associated protein 5 (Spermatogenesis-associated factor protein)	0.598	0.05
SWM	D-Lactaldehyde	unknown	0.598	0
SWM	Unknown	Integrator complex subunit 2 (Int2)	0.598	0
SWM	Unknown	60S ribosomal protein L32	0.598	0.03
SWM	Unknown	Retinol-binding protein 1 (Cellular retinol-binding protein) (CRBP) (Cellular retinol-binding protein I) (CRBP-I) (mCRBPI)	0.598	0.04
SWM	15(S)-Hydroxyeicosatrienoic acid	3-hydroxyacyl-CoA dehydrogenase type-2 (EC 1.1.1.35) (17-beta-hydroxysteroid dehydrogenase 10) (17-beta-HSD 10) (EC 1.1.1.51) (3-hydroxy-2-methylbutyryl-CoA dehydrogenase) (EC 1.1.1.178) (3-hydroxyacyl-CoA dehydrogenase type II) (Endoplasmic reticulum-associated amyloid beta-peptide-binding protein) (Mitochondrial ribonuclease P protein 2) (Mitochondrial RNase P protein 2) (Type II HADH)	0.599	0.04
SWM	2,6-Diamino-4-hydroxy-5-N-methylformamidopyrimidine	Proteasome subunit alpha type-7 (EC 3.4.25.1) (Proteasome subunit RC6-1)	0.599	0.04
SWM	4-Hydroxybenzoic acid	Cytochrome c oxidase subunit 7A2, mitochondrial (Cytochrome c oxidase subunit VIIa-liver/heart) (Cytochrome c oxidase subunit VIIa-L)	0.599	0.05
SWM	5-Hydroxyindoleacetic acid	39S ribosomal protein L23, mitochondrial	0.599	0.03
SWM	Aminoadipic acid	T-box transcription factor TBX3 (T-box protein 3)	0.599	0.03
SWM	D-Lactaldehyde	unknown	0.599	0.03
SWM	Lipoamide	Sr104 protein (Fragment)	0.599	0.02
SWM	Succinylacetoacetate	Integrin alpha 9 protein	0.599	0.04
SWM	Tyramine	PH and SEC7 domain-containing protein 4 (Exchange factor for ADP-ribosylation factor guanine nucleotide factor 6 B) (Exchange factor for ARF6 B) (Pleckstrin homology and SEC7 domain-containing protein 4)	0.599	0.05
SWM	Tyramine	G1/S-specific cyclin-D2 (Fragment)	0.599	0.01
SWM	Unknown	Epsin-2	0.599	0
SWM	Unknown	Ubiquitin-like protein FUBI (Monoclonal non-specific suppressor factor beta) (MNSF-beta)	0.599	0.05
SWM	Unknown	T-box transcription factor TBX3 (T-box protein 3)	0.599	0.04
SWM	5-Hydroxyindoleacetic acid	unknown	0.6	0.04
SWM	Unknown	unknown	0.6	0.01
SWM	Unknown	Phospholipid phosphatase 3 (EC 3.1.3.4) (Lipid phosphate phosphohydrolase 3) (PAP2-beta) (Phosphatidate phosphohydrolase type 2b) (Phosphatidic acid phosphatase 2b) (PAP-2b) (PAP2b)	0.6	0.05
SWM	Lipoamide	Transforming acidic coiled-coil-containing protein 3 (ARNT-interacting protein)	0.601	0
SWM	Mevalonic acid	Phospholipid phosphatase 3 (EC 3.1.3.4) (Lipid phosphate phosphohydrolase 3) (PAP2-beta) (Phosphatidate phosphohydrolase type 2b) (Phosphatidic acid phosphatase 2b) (PAP-2b) (PAP2b)	0.601	0.03
SWM	Micropine	T-box transcription factor TBX3 (T-box protein 3)	0.601	0.01
SWM	Succinylacetoacetate	PH and SEC7 domain-containing protein 4 (Exchange factor for ADP-ribosylation factor guanine nucleotide factor 6 B) (Exchange factor for ARF6 B) (Pleckstrin homology and SEC7 domain-containing protein 4)	0.601	0.04
SWM	Unknown	Sr104 protein (Fragment)	0.601	0.02
SWM	Unknown	ATP synthase subunit gamma	0.601	0.04
SWM	Unknown	Vesicle-associated membrane protein 8	0.601	0.03
SWM	3-Carboxy-cis,cis-muconate	RNA exonuclease 5 short isoform (Fragment)	0.602	0
SWM	4-Hydroxybenzoic acid	DNA repair protein XRCC3 (X-ray repair cross-complementing protein 3)	0.602	0
SWM	Unknown	60S ribosomal protein L31	0.602	0.05
SWM	Unknown	T-box transcription factor TBX3 (T-box protein 3)	0.602	0.03
SWM	Unknown	HAUS augmin-like complex subunit 3	0.602	0.04
SWM	15(S)-Hydroxyeicosatrienoic acid	ATP synthase subunit gamma	0.603	0.04
SWM	4-Hydroxybenzoic acid	Sr104 protein (Fragment)	0.603	0.04
SWM	4-Hydroxybenzoic acid	T-box transcription factor TBX3 (T-box protein 3)	0.603	0.01
SWM	Unknown	60S ribosomal protein L30	0.603	0.04
SWM	Unknown	Sr104 protein (Fragment)	0.603	0.04
SWM	Unknown	Zfp217 protein (Fragment)	0.603	0.01
SWM	Unknown	Zfp217 protein (Fragment)	0.603	0.01
SWM	Unknown	HAUS augmin-like complex subunit 3	0.603	0.01
SWM	15(S)-Hydroxyeicosatrienoic acid	DNA repair protein XRCC3 (X-ray repair cross-complementing protein 3)	0.604	0
SWM	D-Lactaldehyde	Oxygen-dependent coproporphyrinogen-III oxidase, mitochondrial (COX) (Coprogen oxidase) (Coproporphyrinogenase) (EC 1.3.3.3)	0.604	0.03
SWM	Hexatriacontapentaenoic acid	40S ribosomal protein S27	0.604	0.05
SWM	Lipoamide	T-box transcription factor TBX3 (T-box protein 3)	0.604	0.03
SWM	Unknown	unknown	0.604	0.04
SWM	Unknown	Proteasome subunit beta type-6 (EC 3.4.25.1) (Low molecular mass protein 19) (Macropain delta chain) (Multicatalytic endopeptidase complex delta chain) (Proteasome delta chain) (Proteasome subunit Y)	0.604	0.04
SWM	Unknown	Ubiquitin-like protein FUBI (Monoclonal non-specific suppressor factor beta) (MNSF-beta)	0.604	0.05
SWM	Unknown	Zfp217 protein (Fragment)	0.604	0
SWM	Unknown	60S ribosomal protein L32	0.604	0.05
SWM	N-butanoyl-lhomoserine lactone	RNA exonuclease 5 short isoform (Fragment)	0.605	0
SWM	4-Hydroxybenzoic acid	Oxygen-dependent coproporphyrinogen-III oxidase, mitochondrial (COX) (Coprogen oxidase) (Coproporphyrinogenase) (EC 1.3.3.3)	0.605	0.04
SWM	Aminoadipic acid	Epsin-2	0.605	0
SWM	Isopropanol	Epsin-2	0.605	0
SWM	Lipoamide	DNA repair protein XRCC3 (X-ray repair cross-complementing protein 3)	0.605	0
SWM	Mevalonic acid	40S ribosomal protein S10	0.605	0.04
SWM	Unknown	tRNA wybutosine-synthesizing protein 5 (EC 1.14.11.42) (tRNA(Phe) (7-(3-amino-3-carboxypropyl)wyosine(37)-C(2))-hydroxylase)	0.605	0.02
SWM	Unknown	Eukaryotic initiation factor 4A-II	0.605	0.02
SWM	Unknown	Ubiquinol-cytochrome-c reductase complex assembly factor 2	0.605	0.05
SWM	Unknown	Proteasome subunit beta type (EC 3.4.25.1)	0.605	0.01
SWM	Unknown	ATP synthase subunit gamma	0.605	0.05
SWM	Unknown	unknown	0.605	0.01
SWM	1-Pyrroline-5-carboxylic acid	40S ribosomal protein S17	0.606	0.05
SWM	2,6-Diamino-4-hydroxy-5-N-methylformamidopyrimidine	Zfp217 protein (Fragment)	0.606	0
SWM	6-Dimethylaminopurine	Acetoacetyl-CoA synthetase (EC 6.2.1.16)	0.606	0.04
SWM	Succinylacetoacetate	CD5 antigen-like (Apoptosis inhibitor expressed by macrophages) (mAIM) (Apoptosis inhibitory 6) (SP-alpha)	0.606	0.05
SWM	Tropinone	ATP synthase subunit gamma	0.606	0.02
SWM	Unknown	unknown	0.606	0.01
SWM	Unknown	Epsin-2	0.606	0
SWM	Unknown	Transcription factor MafB (Maf-B) (Kreisler) (Segmentation protein Kr) (Transcription factor Maf-1) (V-maf musculoaponeurotic fibrosarcoma oncogene homolog B)	0.606	0.02
SWM	Unknown	CD5 antigen-like (Apoptosis inhibitor expressed by macrophages) (mAIM) (Apoptosis inhibitory 6) (SP-alpha)	0.606	0.03
SWM	Unknown	Vesicle-associated membrane protein 8	0.606	0.05
SWM	Unknown	ATP synthase subunit g, mitochondrial (ATPase subunit g)	0.606	0.05
SWM	N-butanoyl-lhomoserine lactone	40S ribosomal protein S25	0.607	0.03
SWM	Isopropanol	RNA exonuclease 5 short isoform (Fragment)	0.607	0
SWM	Tyramine	Vesicle-associated membrane protein 8	0.607	0.05
SWM	Unknown	Mitochondrial import inner membrane translocase subunit Tim22	0.607	0.03
SWM	Unknown	Annexin	0.607	0.04
SWM	Unknown	40S ribosomal protein S10	0.607	0.04
SWM	Unknown	Sr104 protein (Fragment)	0.607	0.03
SWM	Unknown	Vesicle-associated membrane protein 8	0.607	0.05
SWM	Unknown	RNA exonuclease 5 short isoform (Fragment)	0.607	0
SWM	4-Oxo-4-(3-pyridyl)-butanamide	Proteasome subunit alpha type-7 (EC 3.4.25.1) (Proteasome subunit RC6-1)	0.608	0.05
SWM	Homoanserine	MCG7669, isoform CRA_b (Suppressor of Ty 4A)	0.608	0.04
SWM	Unknown	Epsin-2	0.608	0.03
SWM	Unknown	Sr104 protein (Fragment)	0.608	0.05
SWM	Unknown	Zfp217 protein (Fragment)	0.608	0
SWM	Unknown	unknown	0.608	0.01
SWM	Unknown	Spermatogenesis-associated protein 5 (Spermatogenesis-associated factor protein)	0.608	0.01
SWM	3-Carboxy-cis,cis-muconate	Epsin-2	0.609	0.02
SWM	2-Hydroxyadipic acid	T-box transcription factor TBX3 (T-box protein 3)	0.609	0.02
SWM	Micropine	PH and SEC7 domain-containing protein 4 (Exchange factor for ADP-ribosylation factor guanine nucleotide factor 6 B) (Exchange factor for ARF6 B) (Pleckstrin homology and SEC7 domain-containing protein 4)	0.609	0.02
SWM	Succinylacetoacetate	Integrator complex subunit 2 (Int2)	0.609	0.02
SWM	Tyramine	Brain mitochondrial carrier protein 1	0.609	0
SWM	Unknown	Epsin-2	0.609	0
SWM	Unknown	Zfp217 protein (Fragment)	0.609	0.01
SWM	Unknown	T-box transcription factor TBX3 (T-box protein 3)	0.609	0.03
SWM	Unknown	NADH dehydrogenase [ubiquinone] 1 beta subcomplex subunit 7 (Complex I-B18) (CI-B18) (NADH-ubiquinone oxidoreductase B18 subunit)	0.609	0.04
SWM	Unknown	Ankyrin repeat domain-containing protein 37	0.609	0
SWM	Unknown	Brain mitochondrial carrier protein 1	0.609	0
SWM	Unknown	Epsin-2	0.61	0
SWM	Unknown	PH and SEC7 domain-containing protein 4 (Exchange factor for ADP-ribosylation factor guanine nucleotide factor 6 B) (Exchange factor for ARF6 B) (Pleckstrin homology and SEC7 domain-containing protein 4)	0.61	0.01
SWM	Unknown	PH and SEC7 domain-containing protein 4 (Exchange factor for ADP-ribosylation factor guanine nucleotide factor 6 B) (Exchange factor for ARF6 B) (Pleckstrin homology and SEC7 domain-containing protein 4)	0.61	0.05
SWM	Unknown	Attractin	0.61	0
SWM	Unknown	RNA exonuclease 5 short isoform (Fragment)	0.61	0
SWM	Unknown	ATP synthase subunit g, mitochondrial (ATPase subunit g)	0.61	0.04
SWM	2,6-Diamino-4-hydroxy-5-N-methylformamidopyrimidine	PH and SEC7 domain-containing protein 4 (Exchange factor for ADP-ribosylation factor guanine nucleotide factor 6 B) (Exchange factor for ARF6 B) (Pleckstrin homology and SEC7 domain-containing protein 4)	0.611	0.01
SWM	2,6-Diamino-4-hydroxy-5-N-methylformamidopyrimidine	RNA exonuclease 5 short isoform (Fragment)	0.611	0
SWM	Mevalonic acid	Attractin	0.611	0
SWM	Succinylacetoacetate	Brain mitochondrial carrier protein 1	0.611	0
SWM	Unknown	unknown	0.611	0
SWM	Unknown	unknown	0.611	0.03
SWM	Unknown	Transcription factor MafB (Maf-B) (Kreisler) (Segmentation protein Kr) (Transcription factor Maf-1) (V-maf musculoaponeurotic fibrosarcoma oncogene homolog B)	0.611	0.02
SWM	Unknown	Zfp217 protein (Fragment)	0.611	0
SWM	3-Carboxy-cis,cis-muconate	HAUS augmin-like complex subunit 3	0.612	0.01
SWM	Tyramine	Integrator complex subunit 2 (Int2)	0.612	0.02
SWM	Unknown	Epsin-2	0.612	0
SWM	Unknown	Tetratricopeptide repeat protein 8 (Fragment)	0.612	0
SWM	Unknown	Zfp217 protein (Fragment)	0.612	0.01
SWM	Unknown	T-box transcription factor TBX3 (T-box protein 3)	0.612	0.03
SWM	Unknown	G1/S-specific cyclin-D2 (Fragment)	0.612	0
SWM	Unknown	G1/S-specific cyclin-D2 (Fragment)	0.612	0
SWM	Unknown	Mid1-interacting protein 1 (Gastrulation-specific G12-like protein) (Mid1-interacting G12-like protein) (Protein STRAIT11499 homolog) (Spot 14-related protein) (S14R) (Spot 14-R)	0.612	0.03
SWM	Diketospirilloxanthin/ 2,2'-Diketospirilloxanthin	17-beta-hydroxysteroid dehydrogenase type 6 (17-beta-HSD 6) (17-beta-HSD6) (EC 1.1.1.105) (EC 1.1.1.239) (EC 1.1.1.62) (17-beta-HSD9) (3-alpha->beta-hydroxysteroid epimerase) (3-alpha->beta-HSE) (Oxidative 3-alpha hydroxysteroid dehydrogenase)	0.613	0.04
SWM	L-Acetylcarnitine	Acetoacetyl-CoA synthetase (EC 6.2.1.16)	0.613	0.05
SWM	Lipoamide	Zfp217 protein (Fragment)	0.613	0.01
SWM	Lipoamide	3-hydroxyacyl-CoA dehydrogenase type-2 (EC 1.1.1.35) (17-beta-hydroxysteroid dehydrogenase 10) (17-beta-HSD 10) (EC 1.1.1.51) (3-hydroxy-2-methylbutyryl-CoA dehydrogenase) (EC 1.1.1.178) (3-hydroxyacyl-CoA dehydrogenase type II) (Endoplasmic reticulum-associated amyloid beta-peptide-binding protein) (Mitochondrial ribonuclease P protein 2) (Mitochondrial RNase P protein 2) (Type II HADH)	0.613	0.04
SWM	Mevalonic acid	Vesicle-associated membrane protein 8	0.613	0.05
SWM	Micropine	Transmembrane protein 256	0.613	0.05
SWM	Unknown	Integrator complex subunit 2 (Int2)	0.613	0
SWM	Unknown	Integrator complex subunit 2 (Int2)	0.613	0.01
SWM	Unknown	Sr104 protein (Fragment)	0.613	0.04
SWM	Unknown	CD5 antigen-like (Apoptosis inhibitor expressed by macrophages) (mAIM) (Apoptosis inhibitory 6) (SP-alpha)	0.613	0.04
SWM	Unknown	Vesicle-associated membrane protein 8	0.613	0.05
SWM	Unknown	RNA exonuclease 5 short isoform (Fragment)	0.613	0.01
SWM	Unknown	Brain mitochondrial carrier protein 1	0.613	0.01
SWM	4-Hydroxybenzoic acid	NADH dehydrogenase [ubiquinone] 1 beta subcomplex subunit 7 (Complex I-B18) (CI-B18) (NADH-ubiquinone oxidoreductase B18 subunit)	0.614	0.05
SWM	5-Hydroxyindoleacetic acid	unknown	0.614	0.02
SWM	D-Lactaldehyde	ATP synthase subunit g, mitochondrial (ATPase subunit g)	0.614	0.03
SWM	Indolylacryloylglycine	unknown	0.614	0.01
SWM	Tropinone	Uncharacterized protein (Fragment)	0.614	0.05
SWM	Unknown	unknown	0.614	0
SWM	Unknown	Integrator complex subunit 2 (Int2)	0.614	0
SWM	Unknown	DNA repair protein XRCC3 (X-ray repair cross-complementing protein 3)	0.614	0
SWM	Unknown	DNA repair protein XRCC3 (X-ray repair cross-complementing protein 3)	0.614	0
SWM	Unknown	Methionine aminopeptidase 1D, mitochondrial (MAP 1D) (MetAP 1D) (EC 3.4.11.18) (Methionyl aminopeptidase type 1D, mitochondrial) (Peptidase M 1D)	0.614	0.03
SWM	Unknown	dCTP pyrophosphatase 1 (EC 3.6.1.12) (Deoxycytidine-triphosphatase 1) (dCTPase 1) (RS21-C6)	0.614	0.03
SWM	Unknown	NADH dehydrogenase [ubiquinone] 1 beta subcomplex subunit 7 (Complex I-B18) (CI-B18) (NADH-ubiquinone oxidoreductase B18 subunit)	0.614	0.03
SWM	3-Carboxy-cis,cis-muconate	39S ribosomal protein L23, mitochondrial	0.615	0.02
SWM	2-Indolecarboxylic acid	ATP synthase subunit gamma	0.615	0.04
SWM	Aminoadipic acid	MCG116671	0.615	0.05
SWM	Homoanserine	Protein phosphatase 1 regulatory subunit 3B (Hepatic glycogen-targeting protein phosphatase 1 regulatory subunit GL) (Protein phosphatase 1 regulatory subunit 4) (PP1 subunit R4) (Protein phosphatase 1 subunit GL) (PTG)	0.615	0.04
SWM	Micropine	DNA repair protein XRCC3 (X-ray repair cross-complementing protein 3)	0.615	0
SWM	Unknown	60S ribosomal protein L31	0.615	0.05
SWM	Unknown	Transmembrane protein 256	0.615	0.04
SWM	Unknown	Proteasome subunit alpha type-7 (EC 3.4.25.1) (Proteasome subunit RC6-1)	0.615	0.04
SWM	Unknown	HAUS augmin-like complex subunit 3	0.615	0.02
SWM	Unknown	Vesicle-associated membrane protein 8	0.615	0.03
SWM	N-butanoyl-lhomoserine lactone	DNA repair protein XRCC3 (X-ray repair cross-complementing protein 3)	0.616	0.01
SWM	1-Pyrroline-5-carboxylic acid	Epsin-2	0.616	0.01
SWM	6-Dimethylaminopurine	Testis development-related protein	0.616	0.03
SWM	Hexatriacontapentaenoic acid	Mitochondrial import inner membrane translocase subunit Tim22	0.616	0.05
SWM	Isopropanol	Proteasome subunit alpha type-7 (EC 3.4.25.1) (Proteasome subunit RC6-1)	0.616	0.05
SWM	Isopropanol	Brain mitochondrial carrier protein 1	0.616	0
SWM	Tyramine	Eukaryotic initiation factor 4A-II	0.616	0.05
SWM	Unknown	Epsin-2	0.616	0
SWM	Unknown	Annexin	0.616	0.05
[truncated: 2,346 more rows]
